# Supplementary material for: Intermediary conformations linked to the directionality of the aminoacylation pathway of nonribosomal peptide synthetases
Source: RSC Chem Biol. 2021 Mar 4;2(3):843–54. doi: 10.1039/d0cb00220h (PMC8341999; doi:10.1039/d0cb00220h)
Supplement: CB-002-D0CB00220H-s002 [file CB-002-D0CB00220H-s002.xlsx]

## Sheet: Metadata
Overview of data obtained by hydrogen-deuterium exchange mass spectrometry (HDX-MS)
Dataset 1	GrsA (apo/ATP-Phe/ATP-Phe-PPi)
Conditions of H/D exchange	25 °C in 50 mM HEPES-Na, pH 7.0, 100 mM NaCl, 100 mM MgCl2 and 1 mM EDTA; final D2O = 90 %
Timecourse of H/D exchange	10/30/95/1000 s
Replicates	3, technical (separate H/D exchange reactions measured)
Number of Peptides	336
Sequence coverage [%]	95
Redundancy	2017-03-01
Significance criterium applied	95 % Confidence interval (1.58 Da for ATP-Phe versus apo, 1.50 Da for ATP-Phe-PPi verus ATP-Phe, 1.57 Da for ATP-Phe-PPi versus apo)

## Sheet: Dataset
Protein state	Start	End	Peptide sequence	Maximum Uptake [Da]	Peptide mass [Da]	Retention time [min]	Retention time SD [min]	HDX time [s]	Uptake [Da]	Uptake SD [Da]
ATP-Phe	-39	-20	DEKTTGWRGGHVVEGLAGEL	19	2110.04	8.83994	0.001911	0	0	0
ATP-Phe	-39	-20	DEKTTGWRGGHVVEGLAGEL	19	2110.04	8.87114	0.008289	10	9.18715	0.067193
ATP-Phe	-39	-20	DEKTTGWRGGHVVEGLAGEL	19	2110.04	8.86855	0.001075	30	9.28069	0.113645
ATP-Phe	-39	-20	DEKTTGWRGGHVVEGLAGEL	19	2110.04	8.8776	0.00366	95	9.06459	0.067119
ATP-Phe	-39	-20	DEKTTGWRGGHVVEGLAGEL	19	2110.04	8.88361	0.004107	1000	9.09448	0.091376
ATP-Phe-PPi	-39	-20	DEKTTGWRGGHVVEGLAGEL	19	2110.04	8.84677	0.00404	0	0	0
ATP-Phe-PPi	-39	-20	DEKTTGWRGGHVVEGLAGEL	19	2110.04	8.86648	0.004349	10	9.16285	0.018344
ATP-Phe-PPi	-39	-20	DEKTTGWRGGHVVEGLAGEL	19	2110.04	8.86901	0.006723	30	9.07891	0.020136
ATP-Phe-PPi	-39	-20	DEKTTGWRGGHVVEGLAGEL	19	2110.04	8.87166	0.001077	95	8.88798	0.035394
ATP-Phe-PPi	-39	-20	DEKTTGWRGGHVVEGLAGEL	19	2110.04	8.86599	0.004763	1000	8.85252	0.060061
apo	-39	-20	DEKTTGWRGGHVVEGLAGEL	19	2110.04	8.85713	0.003341	0	0	0
apo	-39	-20	DEKTTGWRGGHVVEGLAGEL	19	2110.04	8.87218	0.00537	10	9.4219	0.037276
apo	-39	-20	DEKTTGWRGGHVVEGLAGEL	19	2110.04	8.86487	0.002145	30	9.49366	0.14206
apo	-39	-20	DEKTTGWRGGHVVEGLAGEL	19	2110.04	8.8698	0.001774	95	9.28327	0.053039
apo	-39	-20	DEKTTGWRGGHVVEGLAGEL	19	2110.04	8.87789	0.003468	1000	9.37587	0.017456
ATP-Phe	-37	-20	KTTGWRGGHVVEGLAGEL	17	1865.97	8.62331	0.001265	0	0	0
ATP-Phe	-37	-20	KTTGWRGGHVVEGLAGEL	17	1865.97	8.67049	0.011788	10	8.86109	0.093357
ATP-Phe	-37	-20	KTTGWRGGHVVEGLAGEL	17	1865.97	8.66302	0.002316	30	9.07795	0.217368
ATP-Phe	-37	-20	KTTGWRGGHVVEGLAGEL	17	1865.97	8.67317	0.00459	95	8.77589	0.042958
ATP-Phe	-37	-20	KTTGWRGGHVVEGLAGEL	17	1865.97	8.68873	0.00621	1000	8.87428	0.080119
ATP-Phe-PPi	-37	-20	KTTGWRGGHVVEGLAGEL	17	1865.97	8.63171	0.004579	0	0	0
ATP-Phe-PPi	-37	-20	KTTGWRGGHVVEGLAGEL	17	1865.97	8.6649	0.004525	10	8.87371	0.074906
ATP-Phe-PPi	-37	-20	KTTGWRGGHVVEGLAGEL	17	1865.97	8.6697	0.007723	30	8.93107	0.013185
ATP-Phe-PPi	-37	-20	KTTGWRGGHVVEGLAGEL	17	1865.97	8.67553	0.00811	95	8.62669	0.01881
ATP-Phe-PPi	-37	-20	KTTGWRGGHVVEGLAGEL	17	1865.97	8.67569	0.009175	1000	8.73765	0.155244
apo	-37	-20	KTTGWRGGHVVEGLAGEL	17	1865.97	8.63179	0.002573	0	0	0
apo	-37	-20	KTTGWRGGHVVEGLAGEL	17	1865.97	8.6574	0.000953	10	9.11897	0.02816
apo	-37	-20	KTTGWRGGHVVEGLAGEL	17	1865.97	8.65977	0.002441	30	9.20456	0.159435
apo	-37	-20	KTTGWRGGHVVEGLAGEL	17	1865.97	8.65755	0.005533	95	9.05236	0.043893
apo	-37	-20	KTTGWRGGHVVEGLAGEL	17	1865.97	8.67473	0.005802	1000	9.12162	0.054779
ATP-Phe	-16	0	RARLEHHPQGQREPGAS	14	1924.97	5.85993	0.041677	0	0	0
ATP-Phe	-16	0	RARLEHHPQGQREPGAS	14	1924.97	5.98217	0.067687	10	5.06363	0.086797
ATP-Phe	-16	0	RARLEHHPQGQREPGAS	14	1924.97	5.97551	0.028928	30	5.01164	0.052501
ATP-Phe	-16	0	RARLEHHPQGQREPGAS	14	1924.97	5.96761	0.00622	95	4.87424	0.099181
ATP-Phe	-16	0	RARLEHHPQGQREPGAS	14	1924.97	5.9083	0.052898	1000	4.78167	0.12319
ATP-Phe-PPi	-16	0	RARLEHHPQGQREPGAS	14	1924.97	5.73032	0.043774	0	0	0
ATP-Phe-PPi	-16	0	RARLEHHPQGQREPGAS	14	1924.97	5.75084	0.113881	10	5.11798	0.047374
ATP-Phe-PPi	-16	0	RARLEHHPQGQREPGAS	14	1924.97	5.66405	0.022346	30	5.09505	0.055891
ATP-Phe-PPi	-16	0	RARLEHHPQGQREPGAS	14	1924.97	5.65054	0.013817	95	4.86526	0.095573
ATP-Phe-PPi	-16	0	RARLEHHPQGQREPGAS	14	1924.97	5.69312	0.05891	1000	4.78176	0.170341
apo	-16	0	RARLEHHPQGQREPGAS	14	1924.97	5.96396	0.034171	0	0	0
apo	-16	0	RARLEHHPQGQREPGAS	14	1924.97	5.98026	0.021814	10	5.23589	0.101739
apo	-16	0	RARLEHHPQGQREPGAS	14	1924.97	5.94044	0.031356	30	5.16189	0.116999
apo	-16	0	RARLEHHPQGQREPGAS	14	1924.97	5.96296	0.007722	95	5.08505	0.091665
apo	-16	0	RARLEHHPQGQREPGAS	14	1924.97	5.98975	0.015808	1000	5.15407	0.107566
ATP-Phe	-12	2	EHHPQGQREPGASML	12	1672.77	7.29545	0.006331	0	0	0
ATP-Phe	-12	2	EHHPQGQREPGASML	12	1672.77	7.3679	0.005528	10	5.60021	0.109247
ATP-Phe	-12	2	EHHPQGQREPGASML	12	1672.77	7.36976	0.006605	30	5.63231	0.135933
ATP-Phe	-12	2	EHHPQGQREPGASML	12	1672.77	7.36773	0.005497	95	5.42557	0.047729
ATP-Phe	-12	2	EHHPQGQREPGASML	12	1672.77	7.3713	0.004079	1000	5.41647	0.057035
ATP-Phe-PPi	-12	2	EHHPQGQREPGASML	12	1672.77	7.29103	0.0025	0	0	0
ATP-Phe-PPi	-12	2	EHHPQGQREPGASML	12	1672.77	7.35272	0.00768	10	5.58325	0.094714
ATP-Phe-PPi	-12	2	EHHPQGQREPGASML	12	1672.77	7.35644	0.01277	30	5.4837	0.068252
ATP-Phe-PPi	-12	2	EHHPQGQREPGASML	12	1672.77	7.35922	0.011733	95	5.33042	0.048424
ATP-Phe-PPi	-12	2	EHHPQGQREPGASML	12	1672.77	7.35712	0.013946	1000	5.2643	0.103527
apo	-12	2	EHHPQGQREPGASML	12	1672.77	7.28474	0.00206	0	0	0
apo	-12	2	EHHPQGQREPGASML	12	1672.77	7.35163	0.008318	10	5.72673	0.036767
apo	-12	2	EHHPQGQREPGASML	12	1672.77	7.33373	0.006357	30	5.69131	0.088407
apo	-12	2	EHHPQGQREPGASML	12	1672.77	7.34248	0.006777	95	5.58852	0.034789
apo	-12	2	EHHPQGQREPGASML	12	1672.77	7.35601	0.003029	1000	5.71625	0.04515
ATP-Phe	1	16	MLNSSKSILIHAQNKN	15	1796.96	6.65266	0.096671	0	0	0
ATP-Phe	1	16	MLNSSKSILIHAQNKN	15	1796.96	6.64944	0.013967	10	3.0397	0.111099
ATP-Phe	1	16	MLNSSKSILIHAQNKN	15	1796.96	6.6724	0.032121	30	2.91252	0.269725
ATP-Phe	1	16	MLNSSKSILIHAQNKN	15	1796.96	6.68895	0.037778	95	2.84775	0.244832
ATP-Phe	1	16	MLNSSKSILIHAQNKN	15	1796.96	6.74619	0.005147	1000	3.37291	0.12177
ATP-Phe-PPi	1	16	MLNSSKSILIHAQNKN	15	1796.96	6.69773	0.00306	0	0	0
ATP-Phe-PPi	1	16	MLNSSKSILIHAQNKN	15	1796.96	6.6477	0.015514	10	2.65321	0.169636
ATP-Phe-PPi	1	16	MLNSSKSILIHAQNKN	15	1796.96	6.66819	0.016815	30	2.61355	0.069344
ATP-Phe-PPi	1	16	MLNSSKSILIHAQNKN	15	1796.96	6.7121	0.018645	95	2.71711	0.069216
ATP-Phe-PPi	1	16	MLNSSKSILIHAQNKN	15	1796.96	6.71546	0.006183	1000	3.2344	0.049406
apo	1	16	MLNSSKSILIHAQNKN	15	1796.96	6.52485	0.001097	0	0	0
apo	1	16	MLNSSKSILIHAQNKN	15	1796.96	6.60537	0.036221	10	2.91396	0.0929
apo	1	16	MLNSSKSILIHAQNKN	15	1796.96	6.5983	0.04196	30	3.20506	0.043784
apo	1	16	MLNSSKSILIHAQNKN	15	1796.96	6.57988	0.047748	95	3.39799	0.120495
apo	1	16	MLNSSKSILIHAQNKN	15	1796.96	6.67019	0.020764	1000	3.20743	0.35941
ATP-Phe	2	9	LNSSKSIL	7	860.496	7.92048	0.003286	0	0	0
ATP-Phe	2	9	LNSSKSIL	7	860.496	7.99137	0.005974	10	3.44155	0.022271
ATP-Phe	2	9	LNSSKSIL	7	860.496	8.00152	0.012945	30	3.48252	0.043349
ATP-Phe	2	9	LNSSKSIL	7	860.496	8.00588	0.008573	95	3.39754	0.017406
ATP-Phe	2	9	LNSSKSIL	7	860.496	8.02095	0.004676	1000	3.39789	0.023815
ATP-Phe-PPi	2	9	LNSSKSIL	7	860.496	7.92562	0.004486	0	0	0
ATP-Phe-PPi	2	9	LNSSKSIL	7	860.496	7.97987	0.005369	10	3.45854	0.019072
ATP-Phe-PPi	2	9	LNSSKSIL	7	860.496	7.99255	0.011349	30	3.42821	0.021736
ATP-Phe-PPi	2	9	LNSSKSIL	7	860.496	8.01091	0.011728	95	3.35908	0.016628
ATP-Phe-PPi	2	9	LNSSKSIL	7	860.496	8.01069	0.012741	1000	3.36381	0.029776
apo	2	9	LNSSKSIL	7	860.496	7.9202	0.00265	0	0	0
apo	2	9	LNSSKSIL	7	860.496	7.98133	0.007789	10	3.49254	0.023399
apo	2	9	LNSSKSIL	7	860.496	7.97288	0.006506	30	3.53291	0.040877
apo	2	9	LNSSKSIL	7	860.496	7.98395	0.002368	95	3.4569	0.01645
apo	2	9	LNSSKSIL	7	860.496	7.99121	0.003328	1000	3.48198	0.03215
ATP-Phe	4	9	SSKSIL	5	633.369	7.62315	0.004834	0	0	0
ATP-Phe	4	9	SSKSIL	5	633.369	7.69923	0.004559	10	2.46181	0.049766
ATP-Phe	4	9	SSKSIL	5	633.369	7.71011	0.010073	30	2.53371	0.006497
ATP-Phe	4	9	SSKSIL	5	633.369	7.71282	0.006811	95	2.47608	0.009357
ATP-Phe	4	9	SSKSIL	5	633.369	7.72432	0.005178	1000	2.54786	0.083238
ATP-Phe-PPi	4	9	SSKSIL	5	633.369	7.62731	0.004758	0	0	0
ATP-Phe-PPi	4	9	SSKSIL	5	633.369	7.68712	0.004551	10	2.48417	0.025747
ATP-Phe-PPi	4	9	SSKSIL	5	633.369	7.70067	0.009305	30	2.47215	0.027736
ATP-Phe-PPi	4	9	SSKSIL	5	633.369	7.71518	0.010587	95	2.43818	0.014361
ATP-Phe-PPi	4	9	SSKSIL	5	633.369	7.72131	0.012674	1000	2.40656	0.043618
apo	4	9	SSKSIL	5	633.369	7.61848	0.002501	0	0	0
apo	4	9	SSKSIL	5	633.369	7.68842	0.004983	10	2.56238	0.023089
apo	4	9	SSKSIL	5	633.369	7.68266	0.00489	30	2.57397	0.028815
apo	4	9	SSKSIL	5	633.369	7.68863	0.001732	95	2.51882	0.023225
apo	4	9	SSKSIL	5	633.369	7.69719	0.002056	1000	2.50681	0.012852
ATP-Phe	5	9	SKSIL	4	546.337	7.61974	0.004886	0	0	0
ATP-Phe	5	9	SKSIL	4	546.337	7.6948	0.007147	10	2.15614	0.013754
ATP-Phe	5	9	SKSIL	4	546.337	7.70592	0.011161	30	2.21514	0.016467
ATP-Phe	5	9	SKSIL	4	546.337	7.70873	0.007329	95	2.11113	0.020984
ATP-Phe	5	9	SKSIL	4	546.337	7.72115	0.005151	1000	2.1027	0.053208
ATP-Phe-PPi	5	9	SKSIL	4	546.337	7.62035	0.004619	0	0	0
ATP-Phe-PPi	5	9	SKSIL	4	546.337	7.68379	0.004127	10	2.17574	0.013308
ATP-Phe-PPi	5	9	SKSIL	4	546.337	7.69564	0.009203	30	2.14184	0.019216
ATP-Phe-PPi	5	9	SKSIL	4	546.337	7.7101	0.010237	95	2.0673	0.039822
ATP-Phe-PPi	5	9	SKSIL	4	546.337	7.71687	0.01247	1000	2.03376	0.09644
apo	5	9	SKSIL	4	546.337	7.61561	0.003095	0	0	0
apo	5	9	SKSIL	4	546.337	7.68377	0.004652	10	2.1962	0.03601
apo	5	9	SKSIL	4	546.337	7.67841	0.004994	30	2.21487	0.046723
apo	5	9	SKSIL	4	546.337	7.68403	0.001618	95	2.21905	0.033635
apo	5	9	SKSIL	4	546.337	7.69338	0.001366	1000	2.1536	0.003509
ATP-Phe	8	25	ILIHAQNKNGTHEEEQYL	17	2136.06	7.75162	0.004781	0	0	0
ATP-Phe	8	25	ILIHAQNKNGTHEEEQYL	17	2136.06	7.81337	0.00392	10	6.15168	0.043627
ATP-Phe	8	25	ILIHAQNKNGTHEEEQYL	17	2136.06	7.81145	0.004438	30	6.37123	0.037784
ATP-Phe	8	25	ILIHAQNKNGTHEEEQYL	17	2136.06	7.81332	0.004204	95	6.35146	0.05019
ATP-Phe	8	25	ILIHAQNKNGTHEEEQYL	17	2136.06	7.81611	0.002042	1000	6.38438	0.029017
ATP-Phe-PPi	8	25	ILIHAQNKNGTHEEEQYL	17	2136.06	7.75511	0.003357	0	0	0
ATP-Phe-PPi	8	25	ILIHAQNKNGTHEEEQYL	17	2136.06	7.8084	0.004049	10	6.09355	0.026111
ATP-Phe-PPi	8	25	ILIHAQNKNGTHEEEQYL	17	2136.06	7.81971	0.008577	30	6.17112	0.025173
ATP-Phe-PPi	8	25	ILIHAQNKNGTHEEEQYL	17	2136.06	7.81627	0.007972	95	6.16189	0.078513
ATP-Phe-PPi	8	25	ILIHAQNKNGTHEEEQYL	17	2136.06	7.81055	0.005143	1000	6.20765	0.020099
apo	8	25	ILIHAQNKNGTHEEEQYL	17	2136.06	7.7425	0.002299	0	0	0
apo	8	25	ILIHAQNKNGTHEEEQYL	17	2136.06	7.79333	0.005169	10	6.28114	0.133682
apo	8	25	ILIHAQNKNGTHEEEQYL	17	2136.06	7.78345	0.001687	30	6.48985	0.063829
apo	8	25	ILIHAQNKNGTHEEEQYL	17	2136.06	7.79122	0.002425	95	6.44462	0.060837
apo	8	25	ILIHAQNKNGTHEEEQYL	17	2136.06	7.80298	0.002069	1000	6.47011	0.052433
ATP-Phe	10	20	IHAQNKNGTHE	10	1247.6	4.9866	0.010176	0	0	0
ATP-Phe	10	20	IHAQNKNGTHE	10	1247.6	5.00211	0.007833	10	3.10736	0.023088
ATP-Phe	10	20	IHAQNKNGTHE	10	1247.6	5.03715	0.011909	30	3.09497	0.02337
ATP-Phe	10	20	IHAQNKNGTHE	10	1247.6	5.02934	0.013601	95	3.01155	0.042202
ATP-Phe	10	20	IHAQNKNGTHE	10	1247.6	5.04302	0.038989	1000	2.96252	0.083073
ATP-Phe-PPi	10	20	IHAQNKNGTHE	10	1247.6	5.0262	0.025656	0	0	0
ATP-Phe-PPi	10	20	IHAQNKNGTHE	10	1247.6	5.01014	0.031379	10	3.06789	0.026101
ATP-Phe-PPi	10	20	IHAQNKNGTHE	10	1247.6	5.05091	0.019162	30	2.99488	0.04344
ATP-Phe-PPi	10	20	IHAQNKNGTHE	10	1247.6	5.06505	0.033835	95	2.88245	0.034185
ATP-Phe-PPi	10	20	IHAQNKNGTHE	10	1247.6	5.11367	0.053185	1000	2.87539	0.087678
apo	10	20	IHAQNKNGTHE	10	1247.6	4.93612	0.017405	0	0	0
apo	10	20	IHAQNKNGTHE	10	1247.6	4.96194	0.000596	10	3.02385	0.050461
apo	10	20	IHAQNKNGTHE	10	1247.6	4.93233	0.023443	30	3.03195	0.050351
apo	10	20	IHAQNKNGTHE	10	1247.6	4.96205	0.003601	95	2.93641	0.058982
apo	10	20	IHAQNKNGTHE	10	1247.6	4.96591	0.012029	1000	3.03752	0.039777
ATP-Phe	10	23	IHAQNKNGTHEEEQ	13	1633.74	4.98099	0.010671	0	0	0
ATP-Phe	10	23	IHAQNKNGTHEEEQ	13	1633.74	4.99789	0.008076	10	3.77051	0.019203
ATP-Phe	10	23	IHAQNKNGTHEEEQ	13	1633.74	5.03318	0.011774	30	3.78717	0.037523
ATP-Phe	10	23	IHAQNKNGTHEEEQ	13	1633.74	5.02646	0.01321	95	3.68503	0.030282
ATP-Phe	10	23	IHAQNKNGTHEEEQ	13	1633.74	5.03719	0.040434	1000	3.66003	0.101833
ATP-Phe-PPi	10	23	IHAQNKNGTHEEEQ	13	1633.74	5.02136	0.024808	0	0	0
ATP-Phe-PPi	10	23	IHAQNKNGTHEEEQ	13	1633.74	5.00413	0.031583	10	3.76701	0.015909
ATP-Phe-PPi	10	23	IHAQNKNGTHEEEQ	13	1633.74	5.04333	0.019695	30	3.83824	0.063412
ATP-Phe-PPi	10	23	IHAQNKNGTHEEEQ	13	1633.74	5.0588	0.034668	95	3.72177	0.039956
ATP-Phe-PPi	10	23	IHAQNKNGTHEEEQ	13	1633.74	5.11354	0.054119	1000	3.69595	0.108538
apo	10	23	IHAQNKNGTHEEEQ	13	1633.74	4.93256	0.018715	0	0	0
apo	10	23	IHAQNKNGTHEEEQ	13	1633.74	4.95929	0.002045	10	3.631	0.042989
apo	10	23	IHAQNKNGTHEEEQ	13	1633.74	4.93047	0.024103	30	3.68014	0.052488
apo	10	23	IHAQNKNGTHEEEQ	13	1633.74	4.95769	0.004579	95	3.6131	0.050949
apo	10	23	IHAQNKNGTHEEEQ	13	1633.74	4.95992	0.01147	1000	3.67393	0.041602
ATP-Phe	21	25	EEQYL	4	680.301	8.59254	0.002037	0	0	0
ATP-Phe	21	25	EEQYL	4	680.301	8.6309	0.011512	10	1.81334	0.016467
ATP-Phe	21	25	EEQYL	4	680.301	8.63946	0.006712	30	1.97613	0.013934
ATP-Phe	21	25	EEQYL	4	680.301	8.64798	0.003055	95	2.00885	0.024284
ATP-Phe	21	25	EEQYL	4	680.301	8.65543	0.002771	1000	2.02136	0.022173
ATP-Phe-PPi	21	25	EEQYL	4	680.301	8.60107	0.003118	0	0	0
ATP-Phe-PPi	21	25	EEQYL	4	680.301	8.61986	0.003181	10	1.87389	0.03402
ATP-Phe-PPi	21	25	EEQYL	4	680.301	8.6332	0.011392	30	2.01104	0.014518
ATP-Phe-PPi	21	25	EEQYL	4	680.301	8.64411	0.007417	95	1.98465	0.013888
ATP-Phe-PPi	21	25	EEQYL	4	680.301	8.64311	0.008327	1000	1.98699	0.0147
apo	21	25	EEQYL	4	680.301	8.59422	0.00422	0	0	0
apo	21	25	EEQYL	4	680.301	8.62093	0.005715	10	1.94727	0.022041
apo	21	25	EEQYL	4	680.301	8.61507	0.002152	30	2.03372	0.016771
apo	21	25	EEQYL	4	680.301	8.62225	0.001962	95	2.06392	0.017245
apo	21	25	EEQYL	4	680.301	8.63701	0.006064	1000	2.08563	0.017302
ATP-Phe	26	29	FAVN	3	449.227	6.53442	0.008353	0	0	0
ATP-Phe	26	29	FAVN	3	449.227	6.58471	0.007397	10	0.025638	0.012586
ATP-Phe	26	29	FAVN	3	449.227	6.59113	0.005393	30	0.052135	0.019252
ATP-Phe	26	29	FAVN	3	449.227	6.5872	0.006863	95	0.092785	0.012629
ATP-Phe	26	29	FAVN	3	449.227	6.58255	0.005039	1000	0.351525	0.024459
ATP-Phe-PPi	26	29	FAVN	3	449.227	6.55272	0.149863	0	0	0
ATP-Phe-PPi	26	29	FAVN	3	449.227	6.5592	0.007375	10	0.036579	0.020323
ATP-Phe-PPi	26	29	FAVN	3	449.227	6.57596	0.013456	30	0.057704	0.026874
ATP-Phe-PPi	26	29	FAVN	3	449.227	6.58666	0.01585	95	0.099976	0.023096
ATP-Phe-PPi	26	29	FAVN	3	449.227	6.58249	0.020768	1000	0.412273	0.02192
apo	26	29	FAVN	3	449.227	6.52075	0	0	0	0
apo	26	29	FAVN	3	449.227	6.5741	0.005706	10	0.060046	0.001794
apo	26	29	FAVN	3	449.227	6.55629	0.013881	30	0.101799	0.006537
apo	26	29	FAVN	3	449.227	6.5719	0.001539	95	0.207104	0.01076
apo	26	29	FAVN	3	449.227	6.58157	0.000987	1000	0.550601	0.001766
ATP-Phe	26	44	FAVNNTKAEYPRDKTIHQL	17	2244.16	7.3416	0.006393	0	0	0
ATP-Phe	26	44	FAVNNTKAEYPRDKTIHQL	17	2244.16	7.40849	0.005168	10	2.79317	0.034749
ATP-Phe	26	44	FAVNNTKAEYPRDKTIHQL	17	2244.16	7.41057	0.003907	30	3.40092	0.108078
ATP-Phe	26	44	FAVNNTKAEYPRDKTIHQL	17	2244.16	7.40916	0.003884	95	4.31803	0.093902
ATP-Phe	26	44	FAVNNTKAEYPRDKTIHQL	17	2244.16	7.40849	0.003408	1000	5.32395	0.101049
ATP-Phe-PPi	26	44	FAVNNTKAEYPRDKTIHQL	17	2244.16	7.34828	0.003525	0	0	0
ATP-Phe-PPi	26	44	FAVNNTKAEYPRDKTIHQL	17	2244.16	7.40128	0.001685	10	3.12593	0.056529
ATP-Phe-PPi	26	44	FAVNNTKAEYPRDKTIHQL	17	2244.16	7.40638	0.006734	30	3.76361	0.087721
ATP-Phe-PPi	26	44	FAVNNTKAEYPRDKTIHQL	17	2244.16	7.40547	0.006952	95	4.59021	0.035851
ATP-Phe-PPi	26	44	FAVNNTKAEYPRDKTIHQL	17	2244.16	7.40392	0.003729	1000	5.32503	0.093888
apo	26	44	FAVNNTKAEYPRDKTIHQL	17	2244.16	7.33634	0.00194	0	0	0
apo	26	44	FAVNNTKAEYPRDKTIHQL	17	2244.16	7.39546	0.005072	10	3.80498	0.084023
apo	26	44	FAVNNTKAEYPRDKTIHQL	17	2244.16	7.38754	0.004216	30	4.32094	0.137864
apo	26	44	FAVNNTKAEYPRDKTIHQL	17	2244.16	7.39349	0.002635	95	5.08738	0.049725
apo	26	44	FAVNNTKAEYPRDKTIHQL	17	2244.16	7.40046	0.00139	1000	5.63356	0.063423
ATP-Phe	26	45	FAVNNTKAEYPRDKTIHQLF	18	2391.23	8.21676	0.002802	0	0	0
ATP-Phe	26	45	FAVNNTKAEYPRDKTIHQLF	18	2391.23	8.28739	0.00691	10	3.11457	0.053105
ATP-Phe	26	45	FAVNNTKAEYPRDKTIHQLF	18	2391.23	8.29174	0.005715	30	3.65565	0.072372
ATP-Phe	26	45	FAVNNTKAEYPRDKTIHQLF	18	2391.23	8.29785	0.003598	95	4.59517	0.075148
ATP-Phe	26	45	FAVNNTKAEYPRDKTIHQLF	18	2391.23	8.30295	0.001866	1000	5.63608	0.039577
ATP-Phe-PPi	26	45	FAVNNTKAEYPRDKTIHQLF	18	2391.23	8.22524	0.003257	0	0	0
ATP-Phe-PPi	26	45	FAVNNTKAEYPRDKTIHQLF	18	2391.23	8.28245	0.003956	10	3.35635	0.082796
ATP-Phe-PPi	26	45	FAVNNTKAEYPRDKTIHQLF	18	2391.23	8.28869	0.007715	30	3.98339	0.033449
ATP-Phe-PPi	26	45	FAVNNTKAEYPRDKTIHQLF	18	2391.23	8.294	0.005555	95	4.80592	0.015989
ATP-Phe-PPi	26	45	FAVNNTKAEYPRDKTIHQLF	18	2391.23	8.29092	0.005666	1000	5.61334	0.02981
apo	26	45	FAVNNTKAEYPRDKTIHQLF	18	2391.23	8.2206	0.003332	0	0	0
apo	26	45	FAVNNTKAEYPRDKTIHQLF	18	2391.23	8.27942	0.005214	10	3.97351	0.070408
apo	26	45	FAVNNTKAEYPRDKTIHQLF	18	2391.23	8.27413	0.002075	30	4.5697	0.108472
apo	26	45	FAVNNTKAEYPRDKTIHQLF	18	2391.23	8.27948	0.000801	95	5.28163	0.038508
apo	26	45	FAVNNTKAEYPRDKTIHQLF	18	2391.23	8.28773	0.003419	1000	5.88773	0.036604
ATP-Phe	28	44	VNNTKAEYPRDKTIHQL	15	2026.06	7.33476	0.003115	0	0	0
ATP-Phe	28	44	VNNTKAEYPRDKTIHQL	15	2026.06	7.39801	0.005528	10	2.99092	0.052507
ATP-Phe	28	44	VNNTKAEYPRDKTIHQL	15	2026.06	7.40099	0.003762	30	3.52288	0.056547
ATP-Phe	28	44	VNNTKAEYPRDKTIHQL	15	2026.06	7.37943	0.028521	95	4.32146	0.130963
ATP-Phe	28	44	VNNTKAEYPRDKTIHQL	15	2026.06	7.40027	0.002286	1000	5.24945	0.033853
ATP-Phe-PPi	28	44	VNNTKAEYPRDKTIHQL	15	2026.06	7.33911	0.005031	0	0	0
ATP-Phe-PPi	28	44	VNNTKAEYPRDKTIHQL	15	2026.06	7.393	0.002147	10	3.20913	0.077441
ATP-Phe-PPi	28	44	VNNTKAEYPRDKTIHQL	15	2026.06	7.39572	0.007905	30	3.84185	0.029862
ATP-Phe-PPi	28	44	VNNTKAEYPRDKTIHQL	15	2026.06	7.3957	0.00641	95	4.63497	0.072872
ATP-Phe-PPi	28	44	VNNTKAEYPRDKTIHQL	15	2026.06	7.39002	0.004435	1000	5.28947	0.06122
apo	28	44	VNNTKAEYPRDKTIHQL	15	2026.06	7.32801	0.002138	0	0	0
apo	28	44	VNNTKAEYPRDKTIHQL	15	2026.06	7.38532	0.007103	10	3.84822	0.078134
apo	28	44	VNNTKAEYPRDKTIHQL	15	2026.06	7.35472	0.029379	30	4.32309	0.039095
apo	28	44	VNNTKAEYPRDKTIHQL	15	2026.06	7.38188	0.00161	95	4.94726	0.02027
apo	28	44	VNNTKAEYPRDKTIHQL	15	2026.06	7.38964	0.003559	1000	5.49623	0.006972
ATP-Phe	45	55	FEEQVSKRPNN	9	1346.66	6.20004	0.004597	0	0	0
ATP-Phe	45	55	FEEQVSKRPNN	9	1346.66	6.23332	0.005487	10	0.249261	0.022658
ATP-Phe	45	55	FEEQVSKRPNN	9	1346.66	6.23647	0.005069	30	0.287748	0.027889
ATP-Phe	45	55	FEEQVSKRPNN	9	1346.66	6.23323	0.007815	95	0.487658	0.021392
ATP-Phe	45	55	FEEQVSKRPNN	9	1346.66	6.22824	0.00636	1000	0.601822	0.028808
ATP-Phe-PPi	45	55	FEEQVSKRPNN	9	1346.66	6.19339	0.011615	0	0	0
ATP-Phe-PPi	45	55	FEEQVSKRPNN	9	1346.66	6.2131	0.004446	10	0.256173	0.021221
ATP-Phe-PPi	45	55	FEEQVSKRPNN	9	1346.66	6.23097	0.013217	30	0.372556	0.035686
ATP-Phe-PPi	45	55	FEEQVSKRPNN	9	1346.66	6.24228	0.014287	95	0.511186	0.010581
ATP-Phe-PPi	45	55	FEEQVSKRPNN	9	1346.66	6.23557	0.019933	1000	0.599779	0.024884
apo	45	55	FEEQVSKRPNN	9	1346.66	6.19302	0.00328	0	0	0
apo	45	55	FEEQVSKRPNN	9	1346.66	6.22921	0.005352	10	0.272925	0.01006
apo	45	55	FEEQVSKRPNN	9	1346.66	6.21573	0.008319	30	0.336069	0.018969
apo	45	55	FEEQVSKRPNN	9	1346.66	6.22795	0.001863	95	0.540349	0.012673
apo	45	55	FEEQVSKRPNN	9	1346.66	6.23561	0.001331	1000	0.686524	0.021904
ATP-Phe	46	55	EEQVSKRPNN	8	1199.59	4.9803	0.011316	0	0	0
ATP-Phe	46	55	EEQVSKRPNN	8	1199.59	5.00336	0.008407	10	0.288535	0.021869
ATP-Phe	46	55	EEQVSKRPNN	8	1199.59	5.03668	0.012184	30	0.393605	0.035066
ATP-Phe	46	55	EEQVSKRPNN	8	1199.59	5.03022	0.013057	95	0.570975	0.024695
ATP-Phe	46	55	EEQVSKRPNN	8	1199.59	5.04166	0.040308	1000	0.703826	0.028324
ATP-Phe-PPi	46	55	EEQVSKRPNN	8	1199.59	5.02002	0.024234	0	0	0
ATP-Phe-PPi	46	55	EEQVSKRPNN	8	1199.59	5.01029	0.030883	10	0.332861	0.02194
ATP-Phe-PPi	46	55	EEQVSKRPNN	8	1199.59	5.05184	0.019735	30	0.446797	0.018695
ATP-Phe-PPi	46	55	EEQVSKRPNN	8	1199.59	5.05918	0.03463	95	0.627689	0.021591
ATP-Phe-PPi	46	55	EEQVSKRPNN	8	1199.59	5.10716	0.0522	1000	0.726088	0.026834
apo	46	55	EEQVSKRPNN	8	1199.59	4.9361	0.020909	0	0	0
apo	46	55	EEQVSKRPNN	8	1199.59	4.95953	0.001307	10	0.357089	0.019425
apo	46	55	EEQVSKRPNN	8	1199.59	4.93031	0.024428	30	0.437373	0.041649
apo	46	55	EEQVSKRPNN	8	1199.59	4.95872	0.004099	95	0.655582	0.01636
apo	46	55	EEQVSKRPNN	8	1199.59	4.96607	0.013055	1000	0.820828	0.016485
ATP-Phe	47	55	EQVSKRPNN	7	1070.55	4.97921	0.010906	0	0	0
ATP-Phe	47	55	EQVSKRPNN	7	1070.55	4.99875	0.008435	10	0.334888	0.029617
ATP-Phe	47	55	EQVSKRPNN	7	1070.55	5.03238	0.012319	30	0.449167	0.05257
ATP-Phe	47	55	EQVSKRPNN	7	1070.55	5.02524	0.013919	95	0.586519	0.037087
ATP-Phe	47	55	EQVSKRPNN	7	1070.55	5.0368	0.03925	1000	0.676408	0.02353
ATP-Phe-PPi	47	55	EQVSKRPNN	7	1070.55	5.01858	0.026127	0	0	0
ATP-Phe-PPi	47	55	EQVSKRPNN	7	1070.55	5.0072	0.031784	10	0.343374	0.025495
ATP-Phe-PPi	47	55	EQVSKRPNN	7	1070.55	5.04697	0.018873	30	0.46312	0.031899
ATP-Phe-PPi	47	55	EQVSKRPNN	7	1070.55	5.05925	0.034366	95	0.672221	0.025463
ATP-Phe-PPi	47	55	EQVSKRPNN	7	1070.55	5.11323	0.054469	1000	0.773306	0.025914
apo	47	55	EQVSKRPNN	7	1070.55	4.93137	0.019527	0	0	0
apo	47	55	EQVSKRPNN	7	1070.55	4.95668	0.001027	10	0.352366	0.017087
apo	47	55	EQVSKRPNN	7	1070.55	4.93018	0.022558	30	0.466121	0.02082
apo	47	55	EQVSKRPNN	7	1070.55	4.95681	0.003889	95	0.73362	0.035366
apo	47	55	EQVSKRPNN	7	1070.55	4.96134	0.011712	1000	0.800648	0.043927
ATP-Phe	47	57	EQVSKRPNNVA	9	1240.65	5.6659	0.011461	0	0	0
ATP-Phe	47	57	EQVSKRPNNVA	9	1240.65	5.72491	0.019486	10	0.318023	0.027032
ATP-Phe	47	57	EQVSKRPNNVA	9	1240.65	5.73996	0.006428	30	0.383802	0.027755
ATP-Phe	47	57	EQVSKRPNNVA	9	1240.65	5.72986	0.010394	95	0.652191	0.020077
ATP-Phe	47	57	EQVSKRPNNVA	9	1240.65	5.72005	0.008053	1000	1.31995	0.038567
ATP-Phe-PPi	47	57	EQVSKRPNNVA	9	1240.65	5.61807	0.077389	0	0	0
ATP-Phe-PPi	47	57	EQVSKRPNNVA	9	1240.65	5.67908	0.040101	10	0.350329	0.080154
ATP-Phe-PPi	47	57	EQVSKRPNNVA	9	1240.65	5.66686	0.028414	30	0.481552	0.080351
ATP-Phe-PPi	47	57	EQVSKRPNNVA	9	1240.65	5.71089	0.033874	95	0.813083	0.074073
ATP-Phe-PPi	47	57	EQVSKRPNNVA	9	1240.65	5.74495	0.051472	1000	1.42134	0.082954
apo	47	57	EQVSKRPNNVA	9	1240.65	5.69595	0.027762	0	0	0
apo	47	57	EQVSKRPNNVA	9	1240.65	5.7551	0.033706	10	0.392608	0.055087
apo	47	57	EQVSKRPNNVA	9	1240.65	5.72129	0.025782	30	0.450759	0.053483
apo	47	57	EQVSKRPNNVA	9	1240.65	5.73799	0.007538	95	0.831621	0.047074
apo	47	57	EQVSKRPNNVA	9	1240.65	5.73658	0.008546	1000	1.49596	0.05433
ATP-Phe	48	57	QVSKRPNNVA	8	1111.61	5.41584	0.012183	0	0	0
ATP-Phe	48	57	QVSKRPNNVA	8	1111.61	5.47892	0.015574	10	0.336767	0.016171
ATP-Phe	48	57	QVSKRPNNVA	8	1111.61	5.48047	0.003165	30	0.439787	0.03518
ATP-Phe	48	57	QVSKRPNNVA	8	1111.61	5.46907	0.011843	95	0.749721	0.02102
ATP-Phe	48	57	QVSKRPNNVA	8	1111.61	5.43495	0.016046	1000	1.38424	0.061836
ATP-Phe-PPi	48	57	QVSKRPNNVA	8	1111.61	5.02351	0.024412	0	0	0
ATP-Phe-PPi	48	57	QVSKRPNNVA	8	1111.61	5.00922	0.030438	10	0.402748	0.020035
ATP-Phe-PPi	48	57	QVSKRPNNVA	8	1111.61	5.05087	0.019411	30	0.525667	0.021403
ATP-Phe-PPi	48	57	QVSKRPNNVA	8	1111.61	5.06383	0.033485	95	0.836343	0.017405
ATP-Phe-PPi	48	57	QVSKRPNNVA	8	1111.61	5.2969	0.226558	1000	1.49114	0.027659
apo	48	57	QVSKRPNNVA	8	1111.61	5.42825	0.014466	0	0	0
apo	48	57	QVSKRPNNVA	8	1111.61	5.48636	0.01165	10	0.315067	0.020452
apo	48	57	QVSKRPNNVA	8	1111.61	5.4704	0.016324	30	0.468988	0.049443
apo	48	57	QVSKRPNNVA	8	1111.61	5.47959	0.002247	95	0.81643	0.027426
apo	48	57	QVSKRPNNVA	8	1111.61	5.48288	0.012305	1000	1.52987	0.027452
ATP-Phe	49	57	VSKRPNNVA	7	983.551	4.98646	0.010903	0	0	0
ATP-Phe	49	57	VSKRPNNVA	7	983.551	5.00719	0.007553	10	0.318928	0.018236
ATP-Phe	49	57	VSKRPNNVA	7	983.551	5.04171	0.01161	30	0.442553	0.01395
ATP-Phe	49	57	VSKRPNNVA	7	983.551	5.03493	0.012449	95	0.746801	0.03055
ATP-Phe	49	57	VSKRPNNVA	7	983.551	5.05106	0.039635	1000	1.38052	0.030375
ATP-Phe-PPi	49	57	VSKRPNNVA	7	983.551	5.02585	0.027747	0	0	0
ATP-Phe-PPi	49	57	VSKRPNNVA	7	983.551	5.02037	0.032691	10	0.324634	0.02304
ATP-Phe-PPi	49	57	VSKRPNNVA	7	983.551	5.05596	0.01938	30	0.491315	0.017416
ATP-Phe-PPi	49	57	VSKRPNNVA	7	983.551	5.06716	0.033097	95	0.781903	0.017728
ATP-Phe-PPi	49	57	VSKRPNNVA	7	983.551	5.15311	0.116485	1000	1.39758	0.040347
apo	49	57	VSKRPNNVA	7	983.551	4.937	0.018867	0	0	0
apo	49	57	VSKRPNNVA	7	983.551	4.96504	0.001134	10	0.376834	0.014168
apo	49	57	VSKRPNNVA	7	983.551	4.93554	0.022092	30	0.526274	0.040466
apo	49	57	VSKRPNNVA	7	983.551	4.96527	0.00379	95	0.876314	0.008969
apo	49	57	VSKRPNNVA	7	983.551	4.96944	0.01251	1000	1.54259	0.011782
ATP-Phe	58	77	IVCENEQLTYHELNVKANQL	19	2357.17	8.69012	0.003364	0	0	0
ATP-Phe	58	77	IVCENEQLTYHELNVKANQL	19	2357.17	8.74525	0.005163	10	0.791783	0.033929
ATP-Phe	58	77	IVCENEQLTYHELNVKANQL	19	2357.17	8.74359	0.0007	30	0.854411	0.017434
ATP-Phe	58	77	IVCENEQLTYHELNVKANQL	19	2357.17	8.74988	0.001766	95	1.02119	0.041661
ATP-Phe	58	77	IVCENEQLTYHELNVKANQL	19	2357.17	8.75449	0.003315	1000	1.78936	0.047031
ATP-Phe-PPi	58	77	IVCENEQLTYHELNVKANQL	19	2357.17	8.69716	0.004056	0	0	0
ATP-Phe-PPi	58	77	IVCENEQLTYHELNVKANQL	19	2357.17	8.73695	0.004092	10	0.822852	0.01941
ATP-Phe-PPi	58	77	IVCENEQLTYHELNVKANQL	19	2357.17	8.73917	0.005081	30	0.886101	0.023105
ATP-Phe-PPi	58	77	IVCENEQLTYHELNVKANQL	19	2357.17	8.74062	0.001417	95	1.0957	0.024334
ATP-Phe-PPi	58	77	IVCENEQLTYHELNVKANQL	19	2357.17	8.73676	0.002941	1000	1.89358	0.029684
apo	58	77	IVCENEQLTYHELNVKANQL	19	2357.17	8.70183	0.003955	0	0	0
apo	58	77	IVCENEQLTYHELNVKANQL	19	2357.17	8.74156	0.004169	10	0.861965	0.012018
apo	58	77	IVCENEQLTYHELNVKANQL	19	2357.17	8.73744	0.000998	30	0.929073	0.034575
apo	58	77	IVCENEQLTYHELNVKANQL	19	2357.17	8.74026	0.001198	95	1.2507	0.020875
apo	58	77	IVCENEQLTYHELNVKANQL	19	2357.17	8.74625	0.002053	1000	2.07638	0.027756
ATP-Phe	61	77	ENEQLTYHELNVKANQL	16	2042.01	8.37447	0.001479	0	0	0
ATP-Phe	61	77	ENEQLTYHELNVKANQL	16	2042.01	8.42312	0.00948	10	0.164432	0.026697
ATP-Phe	61	77	ENEQLTYHELNVKANQL	16	2042.01	8.42655	0.006564	30	0.206168	0.024013
ATP-Phe	61	77	ENEQLTYHELNVKANQL	16	2042.01	8.43242	0.004671	95	0.358828	0.015267
ATP-Phe	61	77	ENEQLTYHELNVKANQL	16	2042.01	8.43534	0.000625	1000	1.02255	0.070147
ATP-Phe-PPi	61	77	ENEQLTYHELNVKANQL	16	2042.01	8.38291	0.002328	0	0	0
ATP-Phe-PPi	61	77	ENEQLTYHELNVKANQL	16	2042.01	8.42083	0.003532	10	0.136811	0.024268
ATP-Phe-PPi	61	77	ENEQLTYHELNVKANQL	16	2042.01	8.42727	0.007646	30	0.245025	0.027507
ATP-Phe-PPi	61	77	ENEQLTYHELNVKANQL	16	2042.01	8.43187	0.004405	95	0.421216	0.025267
ATP-Phe-PPi	61	77	ENEQLTYHELNVKANQL	16	2042.01	8.42513	0.003743	1000	1.09373	0.038193
apo	61	77	ENEQLTYHELNVKANQL	16	2042.01	8.37896	0.006254	0	0	0
apo	61	77	ENEQLTYHELNVKANQL	16	2042.01	8.41995	0.00651	10	0.176774	0.025296
apo	61	77	ENEQLTYHELNVKANQL	16	2042.01	8.41743	0.001937	30	0.171807	0.038892
apo	61	77	ENEQLTYHELNVKANQL	16	2042.01	8.42066	0.003248	95	0.459856	0.041398
apo	61	77	ENEQLTYHELNVKANQL	16	2042.01	8.42766	0.00654	1000	1.10983	0.011259
ATP-Phe	62	77	NEQLTYHELNVKANQL	15	1912.96	8.33055	0.003232	0	0	0
ATP-Phe	62	77	NEQLTYHELNVKANQL	15	1912.96	8.38345	0.006292	10	0.055806	0.015673
ATP-Phe	62	77	NEQLTYHELNVKANQL	15	1912.96	8.385	0.003464	30	0.081786	0.023687
ATP-Phe	62	77	NEQLTYHELNVKANQL	15	1912.96	8.3903	0.002899	95	0.199169	0.022461
ATP-Phe	62	77	NEQLTYHELNVKANQL	15	1912.96	8.39624	0.000357	1000	0.574254	0.021655
ATP-Phe-PPi	62	77	NEQLTYHELNVKANQL	15	1912.96	8.3399	0.002734	0	0	0
ATP-Phe-PPi	62	77	NEQLTYHELNVKANQL	15	1912.96	8.37811	0.003687	10	0.083817	0.017863
ATP-Phe-PPi	62	77	NEQLTYHELNVKANQL	15	1912.96	8.38547	0.007242	30	0.138598	0.028348
ATP-Phe-PPi	62	77	NEQLTYHELNVKANQL	15	1912.96	8.38882	0.00367	95	0.249573	0.021508
ATP-Phe-PPi	62	77	NEQLTYHELNVKANQL	15	1912.96	8.38507	0.003754	1000	0.607466	0.019295
apo	62	77	NEQLTYHELNVKANQL	15	1912.96	8.33919	0.004109	0	0	0
apo	62	77	NEQLTYHELNVKANQL	15	1912.96	8.38039	0.002985	10	0.106791	0.020225
apo	62	77	NEQLTYHELNVKANQL	15	1912.96	8.37554	0.002093	30	0.154564	0.020349
apo	62	77	NEQLTYHELNVKANQL	15	1912.96	8.38014	0.001111	95	0.289905	0.011627
apo	62	77	NEQLTYHELNVKANQL	15	1912.96	8.38727	0.003337	1000	0.658423	0.02141
ATP-Phe	71	77	NVKANQL	6	785.439	6.80718	0.004658	0	0	0
ATP-Phe	71	77	NVKANQL	6	785.439	6.87687	0.006497	10	-0.104504	0.05772
ATP-Phe	71	77	NVKANQL	6	785.439	6.88607	0.008547	30	-0.069061	0.018616
ATP-Phe	71	77	NVKANQL	6	785.439	6.88579	0.007731	95	-0.058275	0.020187
ATP-Phe	71	77	NVKANQL	6	785.439	6.89113	0.006314	1000	-0.083557	0.017889
ATP-Phe-PPi	71	77	NVKANQL	6	785.439	6.80409	0.006887	0	0	0
ATP-Phe-PPi	71	77	NVKANQL	6	785.439	6.85936	0.005359	10	-0.027608	0.019771
ATP-Phe-PPi	71	77	NVKANQL	6	785.439	6.87581	0.010574	30	-0.026377	0.01973
ATP-Phe-PPi	71	77	NVKANQL	6	785.439	6.88917	0.013502	95	-0.022312	0.018228
ATP-Phe-PPi	71	77	NVKANQL	6	785.439	6.89013	0.014601	1000	-0.053695	0.022239
apo	71	77	NVKANQL	6	785.439	6.80053	0.003928	0	0	0
apo	71	77	NVKANQL	6	785.439	6.8662	0.004784	10	-0.033631	0.01473
apo	71	77	NVKANQL	6	785.439	6.85753	0.005845	30	-0.046758	0.012898
apo	71	77	NVKANQL	6	785.439	6.86643	0.001003	95	-0.041535	0.014848
apo	71	77	NVKANQL	6	785.439	6.87434	0.001536	1000	-0.032563	0.016797
ATP-Phe	71	78	NVKANQLA	7	856.476	7.6565	0.002588	0	0	0
ATP-Phe	71	78	NVKANQLA	7	856.476	7.71571	0.004876	10	0.031931	0.024465
ATP-Phe	71	78	NVKANQLA	7	856.476	7.72163	0.006491	30	0.030914	0.030373
ATP-Phe	71	78	NVKANQLA	7	856.476	7.72469	0.004318	95	0.034768	0.027285
ATP-Phe	71	78	NVKANQLA	7	856.476	7.73019	0.004276	1000	0.106684	0.028111
ATP-Phe-PPi	71	78	NVKANQLA	7	856.476	7.66211	0.003748	0	0	0
ATP-Phe-PPi	71	78	NVKANQLA	7	856.476	7.70614	0.002784	10	0.068618	0.045886
ATP-Phe-PPi	71	78	NVKANQLA	7	856.476	7.71889	0.009553	30	0.104751	0.045055
ATP-Phe-PPi	71	78	NVKANQLA	7	856.476	7.72506	0.008041	95	0.106937	0.036064
ATP-Phe-PPi	71	78	NVKANQLA	7	856.476	7.72741	0.007528	1000	0.154477	0.040246
apo	71	78	NVKANQLA	7	856.476	7.64991	0.003292	0	0	0
apo	71	78	NVKANQLA	7	856.476	7.70416	0.004258	10	0.026527	0.035268
apo	71	78	NVKANQLA	7	856.476	7.69777	0.002763	30	0.032371	0.040074
apo	71	78	NVKANQLA	7	856.476	7.70471	0.001064	95	0.048299	0.026023
apo	71	78	NVKANQLA	7	856.476	7.71373	0.000712	1000	0.168842	0.021129
ATP-Phe	73	77	KANQL	4	572.328	6.19343	0.018786	0	0	0
ATP-Phe	73	77	KANQL	4	572.328	6.2755	0.020356	10	-0.067968	0.009386
ATP-Phe	73	77	KANQL	4	572.328	6.28986	0.008204	30	-0.070728	0.010541
ATP-Phe	73	77	KANQL	4	572.328	6.28985	0.011259	95	-0.085708	0.018539
ATP-Phe	73	77	KANQL	4	572.328	6.28022	0.009659	1000	-0.077198	0.014001
ATP-Phe-PPi	73	77	KANQL	4	572.328	6.17833	0.029631	0	0	0
ATP-Phe-PPi	73	77	KANQL	4	572.328	6.22304	0.032903	10	0.002004	0.01536
ATP-Phe-PPi	73	77	KANQL	4	572.328	6.24275	0.024451	30	0.007807	0.019395
ATP-Phe-PPi	73	77	KANQL	4	572.328	6.27835	0.029856	95	-0.018839	0.017827
ATP-Phe-PPi	73	77	KANQL	4	572.328	6.29082	0.045212	1000	-0.018435	0.034427
apo	73	77	KANQL	4	572.328	6.23211	0.023596	0	0	0
apo	73	77	KANQL	4	572.328	6.29706	0.008054	10	-0.054641	0.016224
apo	73	77	KANQL	4	572.328	6.27297	0.019501	30	-0.074547	0.018169
apo	73	77	KANQL	4	572.328	6.2915	0.002646	95	-0.052214	0.019669
apo	73	77	KANQL	4	572.328	6.30293	0.00502	1000	-0.023409	0.013898
ATP-Phe	78	81	ARIF	3	505.301	8.08553	0.002276	0	0	0
ATP-Phe	78	81	ARIF	3	505.301	8.16091	0.005113	10	0.051004	0.018534
ATP-Phe	78	81	ARIF	3	505.301	8.16848	0.007281	30	0.047299	0.022172
ATP-Phe	78	81	ARIF	3	505.301	8.17145	0.004751	95	0.045565	0.020032
ATP-Phe	78	81	ARIF	3	505.301	8.18491	0.003804	1000	0.025876	0.016185
ATP-Phe-PPi	78	81	ARIF	3	505.301	8.08897	0.003173	0	0	0
ATP-Phe-PPi	78	81	ARIF	3	505.301	8.14923	0.004882	10	0.03588	0.010041
ATP-Phe-PPi	78	81	ARIF	3	505.301	8.16206	0.008333	30	0.025638	0.008788
ATP-Phe-PPi	78	81	ARIF	3	505.301	8.17364	0.008375	95	0.024439	0.008102
ATP-Phe-PPi	78	81	ARIF	3	505.301	8.1767	0.009503	1000	0.011365	0.011335
apo	78	81	ARIF	3	505.301	8.08576	0.002459	0	0	0
apo	78	81	ARIF	3	505.301	8.14846	0.004469	10	0.001613	0.021785
apo	78	81	ARIF	3	505.301	8.14393	0.00398	30	-0.012998	0.014472
apo	78	81	ARIF	3	505.301	8.14988	0.000394	95	0.007165	0.019423
apo	78	81	ARIF	3	505.301	8.16	0.002892	1000	-0.009331	0.006618
ATP-Phe	78	91	ARIFIEKGIGKDTL	13	1559.9	8.10156	0.001886	0	0	0
ATP-Phe	78	91	ARIFIEKGIGKDTL	13	1559.9	8.16384	0.006041	10	0.467834	0.01554
ATP-Phe	78	91	ARIFIEKGIGKDTL	13	1559.9	8.16728	0.004659	30	0.593642	0.023464
ATP-Phe	78	91	ARIFIEKGIGKDTL	13	1559.9	8.17039	0.003445	95	0.932676	0.047026
ATP-Phe	78	91	ARIFIEKGIGKDTL	13	1559.9	8.17444	0.000247	1000	1.95762	0.099979
ATP-Phe-PPi	78	91	ARIFIEKGIGKDTL	13	1559.9	8.11373	0.005131	0	0	0
ATP-Phe-PPi	78	91	ARIFIEKGIGKDTL	13	1559.9	8.16238	0.003705	10	0.511991	0.01238
ATP-Phe-PPi	78	91	ARIFIEKGIGKDTL	13	1559.9	8.17109	0.009068	30	0.687216	0.019806
ATP-Phe-PPi	78	91	ARIFIEKGIGKDTL	13	1559.9	8.1718	0.006007	95	1.05383	0.038114
ATP-Phe-PPi	78	91	ARIFIEKGIGKDTL	13	1559.9	8.16369	0.003603	1000	2.38692	0.066659
apo	78	91	ARIFIEKGIGKDTL	13	1559.9	8.0999	0.001534	0	0	0
apo	78	91	ARIFIEKGIGKDTL	13	1559.9	8.15189	0.004372	10	0.461248	0.026503
apo	78	91	ARIFIEKGIGKDTL	13	1559.9	8.14592	0.000404	30	0.591741	0.041862
apo	78	91	ARIFIEKGIGKDTL	13	1559.9	8.15101	0.000701	95	0.998619	0.023559
apo	78	91	ARIFIEKGIGKDTL	13	1559.9	8.15796	0.004041	1000	2.25183	0.05563
ATP-Phe	81	91	FIEKGIGKDTL	10	1219.68	7.84535	0.004157	0	0	0
ATP-Phe	81	91	FIEKGIGKDTL	10	1219.68	7.90688	0.005524	10	0.497451	0.039698
ATP-Phe	81	91	FIEKGIGKDTL	10	1219.68	7.91333	0.006539	30	0.632373	0.062422
ATP-Phe	81	91	FIEKGIGKDTL	10	1219.68	7.91564	0.003643	95	0.95815	0.030491
ATP-Phe	81	91	FIEKGIGKDTL	10	1219.68	7.91929	0.003171	1000	2.10652	0.185701
ATP-Phe-PPi	81	91	FIEKGIGKDTL	10	1219.68	7.8504	0.00377	0	0	0
ATP-Phe-PPi	81	91	FIEKGIGKDTL	10	1219.68	7.90045	0.003062	10	0.612854	0.021931
ATP-Phe-PPi	81	91	FIEKGIGKDTL	10	1219.68	7.91031	0.008305	30	0.810997	0.011702
ATP-Phe-PPi	81	91	FIEKGIGKDTL	10	1219.68	7.91702	0.006409	95	1.15978	0.022885
ATP-Phe-PPi	81	91	FIEKGIGKDTL	10	1219.68	7.91398	0.006465	1000	2.34671	0.083138
apo	81	91	FIEKGIGKDTL	10	1219.68	7.84507	0.003319	0	0	0
apo	81	91	FIEKGIGKDTL	10	1219.68	7.89719	0.005471	10	0.558103	0.012551
apo	81	91	FIEKGIGKDTL	10	1219.68	7.89566	0.002439	30	0.696838	0.049217
apo	81	91	FIEKGIGKDTL	10	1219.68	7.89901	0.000285	95	1.03561	0.007354
apo	81	91	FIEKGIGKDTL	10	1219.68	7.90519	0.001831	1000	2.27433	0.092759
ATP-Phe	81	93	FIEKGIGKDTLVG	12	1375.77	7.9495	0.004546	0	0	0
ATP-Phe	81	93	FIEKGIGKDTLVG	12	1375.77	8.02281	0.006635	10	0.483511	0.035597
ATP-Phe	81	93	FIEKGIGKDTLVG	12	1375.77	8.02826	0.005428	30	0.626894	0.029913
ATP-Phe	81	93	FIEKGIGKDTLVG	12	1375.77	8.03078	0.003363	95	0.963161	0.039312
ATP-Phe	81	93	FIEKGIGKDTLVG	12	1375.77	8.03702	0.001031	1000	2.0346	0.107474
ATP-Phe-PPi	81	93	FIEKGIGKDTLVG	12	1375.77	7.95721	0.00408	0	0	0
ATP-Phe-PPi	81	93	FIEKGIGKDTLVG	12	1375.77	8.01417	0.006106	10	0.551115	0.03852
ATP-Phe-PPi	81	93	FIEKGIGKDTLVG	12	1375.77	8.02817	0.007353	30	0.741611	0.031983
ATP-Phe-PPi	81	93	FIEKGIGKDTLVG	12	1375.77	8.03257	0.005116	95	1.12248	0.027721
ATP-Phe-PPi	81	93	FIEKGIGKDTLVG	12	1375.77	8.02888	0.004132	1000	2.46404	0.08876
apo	81	93	FIEKGIGKDTLVG	12	1375.77	7.95152	0.001957	0	0	0
apo	81	93	FIEKGIGKDTLVG	12	1375.77	8.01328	0.005519	10	0.556083	0.023722
apo	81	93	FIEKGIGKDTLVG	12	1375.77	8.00518	0.002929	30	0.715351	0.028029
apo	81	93	FIEKGIGKDTLVG	12	1375.77	8.01513	0.002425	95	1.07587	0.032873
apo	81	93	FIEKGIGKDTLVG	12	1375.77	8.0246	0.002609	1000	2.34578	0.072577
ATP-Phe	82	93	IEKGIGKDTLVG	11	1228.7	7.39564	0.003377	0	0	0
ATP-Phe	82	93	IEKGIGKDTLVG	11	1228.7	7.45834	0.006336	10	0.452006	0.013805
ATP-Phe	82	93	IEKGIGKDTLVG	11	1228.7	7.46628	0.007544	30	0.595903	0.035904
ATP-Phe	82	93	IEKGIGKDTLVG	11	1228.7	7.46505	0.004753	95	0.910384	0.03388
ATP-Phe	82	93	IEKGIGKDTLVG	11	1228.7	7.47077	0.003792	1000	1.96395	0.08236
ATP-Phe-PPi	82	93	IEKGIGKDTLVG	11	1228.7	7.40135	0.004563	0	0	0
ATP-Phe-PPi	82	93	IEKGIGKDTLVG	11	1228.7	7.44969	0.004129	10	0.514151	0.016941
ATP-Phe-PPi	82	93	IEKGIGKDTLVG	11	1228.7	7.46092	0.010136	30	0.684433	0.016652
ATP-Phe-PPi	82	93	IEKGIGKDTLVG	11	1228.7	7.46606	0.008954	95	1.05061	0.016463
ATP-Phe-PPi	82	93	IEKGIGKDTLVG	11	1228.7	7.46638	0.007248	1000	2.319	0.086085
apo	82	93	IEKGIGKDTLVG	11	1228.7	7.3899	0.001779	0	0	0
apo	82	93	IEKGIGKDTLVG	11	1228.7	7.44775	0.004548	10	0.476089	0.026556
apo	82	93	IEKGIGKDTLVG	11	1228.7	7.44128	0.00381	30	0.648714	0.049128
apo	82	93	IEKGIGKDTLVG	11	1228.7	7.44699	0.000626	95	0.984785	0.037596
apo	82	93	IEKGIGKDTLVG	11	1228.7	7.45145	0.002412	1000	2.19905	0.036825
ATP-Phe	92	95	VGIM	3	418.225	8.50698	0.002083	0	0	0
ATP-Phe	92	95	VGIM	3	418.225	8.56646	0.00743	10	-0.003084	0.020361
ATP-Phe	92	95	VGIM	3	418.225	8.57265	0.005527	30	0.003023	0.022242
ATP-Phe	92	95	VGIM	3	418.225	8.57786	0.001952	95	-0.008287	0.020242
ATP-Phe	92	95	VGIM	3	418.225	8.58839	0.002778	1000	-0.030932	0.015246
ATP-Phe-PPi	92	95	VGIM	3	418.225	8.51667	0.004375	0	0	0
ATP-Phe-PPi	92	95	VGIM	3	418.225	8.55854	0.002905	10	0.003298	0.019093
ATP-Phe-PPi	92	95	VGIM	3	418.225	8.56928	0.006534	30	-0.010537	0.020428
ATP-Phe-PPi	92	95	VGIM	3	418.225	8.57989	0.00623	95	-0.014724	0.028928
ATP-Phe-PPi	92	95	VGIM	3	418.225	8.58147	0.008078	1000	-0.050794	0.023564
apo	92	95	VGIM	3	418.225	8.51814	0.008015	0	0	0
apo	92	95	VGIM	3	418.225	8.55832	0.004958	10	-0.006093	0.017733
apo	92	95	VGIM	3	418.225	8.55606	0.003636	30	-0.011201	0.017091
apo	92	95	VGIM	3	418.225	8.56275	0.000491	95	-0.017419	0.019032
apo	92	95	VGIM	3	418.225	8.56865	0.00304	1000	-0.021108	0.025293
ATP-Phe	92	96	VGIMM	4	549.265	9.4674	0.00226	0	0	0
ATP-Phe	92	96	VGIMM	4	549.265	9.52008	0.009684	10	-0.028754	0.016007
ATP-Phe	92	96	VGIMM	4	549.265	9.52025	0.000359	30	-0.017229	0.019082
ATP-Phe	92	96	VGIMM	4	549.265	9.52846	0.00222	95	-0.020382	0.011164
ATP-Phe	92	96	VGIMM	4	549.265	9.53665	0.003294	1000	-0.014882	0.013292
ATP-Phe-PPi	92	96	VGIMM	4	549.265	9.47711	0.004259	0	0	0
ATP-Phe-PPi	92	96	VGIMM	4	549.265	9.51885	0.003998	10	-0.015737	0.033339
ATP-Phe-PPi	92	96	VGIMM	4	549.265	9.51789	0.005142	30	-0.018532	0.033663
ATP-Phe-PPi	92	96	VGIMM	4	549.265	9.52205	0.002205	95	-0.021998	0.032767
ATP-Phe-PPi	92	96	VGIMM	4	549.265	9.51792	0.006427	1000	-0.030631	0.034763
apo	92	96	VGIMM	4	549.265	9.4885	0.005208	0	0	0
apo	92	96	VGIMM	4	549.265	9.52371	0.005438	10	0.003474	0.017255
apo	92	96	VGIMM	4	549.265	9.52271	0.001437	30	0.008865	0.014398
apo	92	96	VGIMM	4	549.265	9.52413	0.001952	95	0.001881	0.015773
apo	92	96	VGIMM	4	549.265	9.53115	0.0058	1000	-0.001418	0.016249
ATP-Phe	94	97	IMME	3	522.218	8.06343	0.003173	0	0	0
ATP-Phe	94	97	IMME	3	522.218	8.10772	0.005376	10	0.011031	0.009585
ATP-Phe	94	97	IMME	3	522.218	8.1158	0.005292	30	-0.001869	0.010116
ATP-Phe	94	97	IMME	3	522.218	8.11809	0.003564	95	0.004025	0.008556
ATP-Phe	94	97	IMME	3	522.218	8.12963	0.004153	1000	0.008272	0.010269
ATP-Phe-PPi	94	97	IMME	3	522.218	8.06711	0.00289	0	0	0
ATP-Phe-PPi	94	97	IMME	3	522.218	8.09567	0.004589	10	0.015439	0.017967
ATP-Phe-PPi	94	97	IMME	3	522.218	8.11177	0.009111	30	0.016256	0.016206
ATP-Phe-PPi	94	97	IMME	3	522.218	8.12222	0.008273	95	0.017791	0.019652
ATP-Phe-PPi	94	97	IMME	3	522.218	8.12555	0.008657	1000	0.083683	0.036316
apo	94	97	IMME	3	522.218	8.05882	0.003315	0	0	0
apo	94	97	IMME	3	522.218	8.09493	0.002707	10	0.012063	0.011154
apo	94	97	IMME	3	522.218	8.08911	0.003798	30	0.001479	0.012956
apo	94	97	IMME	3	522.218	8.09681	0.001003	95	0.025721	0.020778
apo	94	97	IMME	3	522.218	8.10751	0.00257	1000	0.08571	0.015623
ATP-Phe	96	101	MEKSID	5	721.331	6.25193	0.006139	0	0	0
ATP-Phe	96	101	MEKSID	5	721.331	6.29573	0.008542	10	0.535923	0.039232
ATP-Phe	96	101	MEKSID	5	721.331	6.30119	0.004098	30	0.694328	0.047554
ATP-Phe	96	101	MEKSID	5	721.331	6.29874	0.00718	95	1.10502	0.027583
ATP-Phe	96	101	MEKSID	5	721.331	6.2899	0.005036	1000	1.66146	0.066309
ATP-Phe-PPi	96	101	MEKSID	5	721.331	6.24141	0.014684	0	0	0
ATP-Phe-PPi	96	101	MEKSID	5	721.331	6.26849	0.008794	10	0.505718	0.054453
ATP-Phe-PPi	96	101	MEKSID	5	721.331	6.28983	0.013813	30	0.696146	0.049246
ATP-Phe-PPi	96	101	MEKSID	5	721.331	6.30109	0.019816	95	1.13774	0.029029
ATP-Phe-PPi	96	101	MEKSID	5	721.331	6.29598	0.027413	1000	1.69161	0.023209
apo	96	101	MEKSID	5	721.331	6.2501	0.008707	0	0	0
apo	96	101	MEKSID	5	721.331	6.29735	0.005583	10	0.652896	0.065459
apo	96	101	MEKSID	5	721.331	6.28218	0.012568	30	0.851782	0.066994
apo	96	101	MEKSID	5	721.331	6.29571	0.001392	95	1.17559	0.027146
apo	96	101	MEKSID	5	721.331	6.30547	0.00161	1000	1.73908	0.041137
ATP-Phe	98	102	KSIDL	4	574.332	7.70192	0.004672	0	0	0
ATP-Phe	98	102	KSIDL	4	574.332	7.77264	0.006725	10	0.125875	0.021137
ATP-Phe	98	102	KSIDL	4	574.332	7.78206	0.0079	30	0.188717	0.017448
ATP-Phe	98	102	KSIDL	4	574.332	7.78382	0.005248	95	0.433557	0.025882
ATP-Phe	98	102	KSIDL	4	574.332	7.79207	0.003104	1000	0.9962	0.018248
ATP-Phe-PPi	98	102	KSIDL	4	574.332	7.70762	0.004888	0	0	0
ATP-Phe-PPi	98	102	KSIDL	4	574.332	7.76234	0.004224	10	0.155095	0.013599
ATP-Phe-PPi	98	102	KSIDL	4	574.332	7.7763	0.008298	30	0.2519	0.021189
ATP-Phe-PPi	98	102	KSIDL	4	574.332	7.78622	0.00986	95	0.48772	0.0204
ATP-Phe-PPi	98	102	KSIDL	4	574.332	7.7862	0.008911	1000	1.02262	0.030875
apo	98	102	KSIDL	4	574.332	7.69583	0.002067	0	0	0
apo	98	102	KSIDL	4	574.332	7.75956	0.003954	10	0.18422	0.007963
apo	98	102	KSIDL	4	574.332	7.75308	0.003323	30	0.274838	0.026007
apo	98	102	KSIDL	4	574.332	7.76053	0.000241	95	0.533374	0.033011
apo	98	102	KSIDL	4	574.332	7.77004	0.002012	1000	1.09545	0.007804
ATP-Phe	102	107	LFIGIL	5	674.436	11.101	0.010817	0	0	0
ATP-Phe	102	107	LFIGIL	5	674.436	11.1005	0.0126	10	-0.014504	0.017786
ATP-Phe	102	107	LFIGIL	5	674.436	11.121	0.008019	30	-0.005507	0.018494
ATP-Phe	102	107	LFIGIL	5	674.436	11.1156	0.006285	95	-0.009955	0.020164
ATP-Phe	102	107	LFIGIL	5	674.436	11.1458	0.012696	1000	-0.028103	0.018619
ATP-Phe-PPi	102	107	LFIGIL	5	674.436	11.16	0.004769	0	0	0
ATP-Phe-PPi	102	107	LFIGIL	5	674.436	11.1373	0.00833	10	-0.035574	0.008958
ATP-Phe-PPi	102	107	LFIGIL	5	674.436	11.139	0.002219	30	-0.036722	0.008211
ATP-Phe-PPi	102	107	LFIGIL	5	674.436	11.1274	0.016009	95	-0.02734	0.021756
ATP-Phe-PPi	102	107	LFIGIL	5	674.436	11.151	0.010412	1000	-0.041327	0.007003
apo	102	107	LFIGIL	5	674.436	11.1084	0.012257	0	0	0
apo	102	107	LFIGIL	5	674.436	11.1122	0.011765	10	-0.009576	0.015078
apo	102	107	LFIGIL	5	674.436	11.1058	0.004424	30	-0.024925	0.012001
apo	102	107	LFIGIL	5	674.436	11.1236	0.011862	95	-0.006143	0.018538
apo	102	107	LFIGIL	5	674.436	11.0992	0.004467	1000	-0.01949	0.010508
ATP-Phe	103	108	FIGILA	5	632.389	10.3066	0.004225	0	0	0
ATP-Phe	103	108	FIGILA	5	632.389	10.3545	0.012368	10	0.00828	0.013595
ATP-Phe	103	108	FIGILA	5	632.389	10.3475	0.005776	30	0.014142	0.01607
ATP-Phe	103	108	FIGILA	5	632.389	10.3551	0.003876	95	0.013469	0.013945
ATP-Phe	103	108	FIGILA	5	632.389	10.3615	0.009249	1000	0.007682	0.01337
ATP-Phe-PPi	103	108	FIGILA	5	632.389	10.323	0.002652	0	0	0
ATP-Phe-PPi	103	108	FIGILA	5	632.389	10.3565	0.004578	10	0.002354	0.010571
ATP-Phe-PPi	103	108	FIGILA	5	632.389	10.3494	0.00478	30	-0.009326	0.009508
ATP-Phe-PPi	103	108	FIGILA	5	632.389	10.3402	0.007092	95	0.005704	0.007271
ATP-Phe-PPi	103	108	FIGILA	5	632.389	10.3385	0.007457	1000	-0.00672	0.009841
apo	103	108	FIGILA	5	632.389	10.3472	0.008571	0	0	0
apo	103	108	FIGILA	5	632.389	10.3691	0.0035	10	-0.004695	0.005565
apo	103	108	FIGILA	5	632.389	10.3724	0.0056	30	-0.01073	0.006953
apo	103	108	FIGILA	5	632.389	10.3645	0.003631	95	0.000837	0.012426
apo	103	108	FIGILA	5	632.389	10.3674	0.006683	1000	-0.002847	0.011035
ATP-Phe	108	120	AVLKAGGAYVPID	11	1272.71	8.30346	0.001859	0	0	0
ATP-Phe	108	120	AVLKAGGAYVPID	11	1272.71	8.35528	0.006508	10	-0.038763	0.017237
ATP-Phe	108	120	AVLKAGGAYVPID	11	1272.71	8.35949	0.004737	30	-0.052662	0.017223
ATP-Phe	108	120	AVLKAGGAYVPID	11	1272.71	8.36325	0.002364	95	-0.011603	0.018876
ATP-Phe	108	120	AVLKAGGAYVPID	11	1272.71	8.36692	0.001343	1000	0.213161	0.041356
ATP-Phe-PPi	108	120	AVLKAGGAYVPID	11	1272.71	8.30993	0.002746	0	0	0
ATP-Phe-PPi	108	120	AVLKAGGAYVPID	11	1272.71	8.34863	0.002982	10	-0.019452	0.016754
ATP-Phe-PPi	108	120	AVLKAGGAYVPID	11	1272.71	8.35759	0.007377	30	-0.007664	0.018369
ATP-Phe-PPi	108	120	AVLKAGGAYVPID	11	1272.71	8.36455	0.004808	95	0.016148	0.014323
ATP-Phe-PPi	108	120	AVLKAGGAYVPID	11	1272.71	8.35866	0.006655	1000	0.266291	0.021549
apo	108	120	AVLKAGGAYVPID	11	1272.71	8.31248	0.004116	0	0	0
apo	108	120	AVLKAGGAYVPID	11	1272.71	8.35226	0.003042	10	0.045681	0.021805
apo	108	120	AVLKAGGAYVPID	11	1272.71	8.34803	0.003067	30	0.053618	0.014181
apo	108	120	AVLKAGGAYVPID	11	1272.71	8.35233	0.000899	95	0.08151	0.030074
apo	108	120	AVLKAGGAYVPID	11	1272.71	8.3584	0.004185	1000	0.344918	0.017438
ATP-Phe	108	132	AVLKAGGAYVPIDIEYPKERIQYIL	22	2818.56	9.58744	0.00438	0	0	0
ATP-Phe	108	132	AVLKAGGAYVPIDIEYPKERIQYIL	22	2818.56	9.64144	0.0082	10	1.08401	0.028825
ATP-Phe	108	132	AVLKAGGAYVPIDIEYPKERIQYIL	22	2818.56	9.63507	0.003656	30	1.18781	0.042602
ATP-Phe	108	132	AVLKAGGAYVPIDIEYPKERIQYIL	22	2818.56	9.64409	0.005209	95	1.34336	0.046065
ATP-Phe	108	132	AVLKAGGAYVPIDIEYPKERIQYIL	22	2818.56	9.64785	0.009688	1000	1.73942	0.037553
ATP-Phe-PPi	108	132	AVLKAGGAYVPIDIEYPKERIQYIL	22	2818.56	9.60041	0.004117	0	0	0
ATP-Phe-PPi	108	132	AVLKAGGAYVPIDIEYPKERIQYIL	22	2818.56	9.64527	0.007155	10	1.20786	0.023708
ATP-Phe-PPi	108	132	AVLKAGGAYVPIDIEYPKERIQYIL	22	2818.56	9.6333	0.00389	30	1.26803	0.027583
ATP-Phe-PPi	108	132	AVLKAGGAYVPIDIEYPKERIQYIL	22	2818.56	9.62648	0.005629	95	1.3681	0.034965
ATP-Phe-PPi	108	132	AVLKAGGAYVPIDIEYPKERIQYIL	22	2818.56	9.62074	0.003791	1000	1.82788	0.056294
apo	108	132	AVLKAGGAYVPIDIEYPKERIQYIL	22	2818.56	9.61665	0.006258	0	0	0
apo	108	132	AVLKAGGAYVPIDIEYPKERIQYIL	22	2818.56	9.64936	0.005549	10	1.17388	0.046894
apo	108	132	AVLKAGGAYVPIDIEYPKERIQYIL	22	2818.56	9.65117	0.003884	30	1.34055	0.037363
apo	108	132	AVLKAGGAYVPIDIEYPKERIQYIL	22	2818.56	9.64708	0.002118	95	1.3837	0.063882
apo	108	132	AVLKAGGAYVPIDIEYPKERIQYIL	22	2818.56	9.65157	0.004652	1000	2.05649	0.032013
ATP-Phe	109	113	VLKAG	4	486.316	6.52501	0.007801	0	0	0
ATP-Phe	109	113	VLKAG	4	486.316	6.57646	0.006331	10	0.107622	0.009199
ATP-Phe	109	113	VLKAG	4	486.316	6.58407	0.00558	30	0.092514	0.036902
ATP-Phe	109	113	VLKAG	4	486.316	6.58062	0.006937	95	0.112123	0.045702
ATP-Phe	109	113	VLKAG	4	486.316	6.57727	0.00551	1000	0.451465	0.026954
ATP-Phe-PPi	109	113	VLKAG	4	486.316	6.51394	0.01037	0	0	0
ATP-Phe-PPi	109	113	VLKAG	4	486.316	6.55559	0.006428	10	0.108234	0.01033
ATP-Phe-PPi	109	113	VLKAG	4	486.316	6.5719	0.012517	30	0.11608	0.020238
ATP-Phe-PPi	109	113	VLKAG	4	486.316	6.58302	0.01539	95	0.099432	0.043499
ATP-Phe-PPi	109	113	VLKAG	4	486.316	6.57709	0.019855	1000	0.537907	0.037536
apo	109	113	VLKAG	4	486.316	6.51332	0.005989	0	0	0
apo	109	113	VLKAG	4	486.316	6.57011	0.00628	10	0.109282	0.00836
apo	109	113	VLKAG	4	486.316	6.55507	0.009399	30	0.1148	0.015749
apo	109	113	VLKAG	4	486.316	6.56802	0.000568	95	0.170755	0.008373
apo	109	113	VLKAG	4	486.316	6.57667	0.001223	1000	0.656984	0.008908
ATP-Phe	111	120	KAGGAYVPID	8	989.518	7.6631	0.002564	0	0	0
ATP-Phe	111	120	KAGGAYVPID	8	989.518	7.71765	0.003976	10	-0.074587	0.057047
ATP-Phe	111	120	KAGGAYVPID	8	989.518	7.72436	0.005565	30	-0.124812	0.061506
ATP-Phe	111	120	KAGGAYVPID	8	989.518	7.72802	0.004658	95	-0.093947	0.076601
ATP-Phe	111	120	KAGGAYVPID	8	989.518	7.73267	0.004619	1000	-0.072184	0.052277
ATP-Phe-PPi	111	120	KAGGAYVPID	8	989.518	7.66503	0.004471	0	0	0
ATP-Phe-PPi	111	120	KAGGAYVPID	8	989.518	7.70801	0.006026	10	0.020347	0.079782
ATP-Phe-PPi	111	120	KAGGAYVPID	8	989.518	7.72156	0.008848	30	-0.035034	0.065014
ATP-Phe-PPi	111	120	KAGGAYVPID	8	989.518	7.72883	0.008193	95	-0.069232	0.061268
ATP-Phe-PPi	111	120	KAGGAYVPID	8	989.518	7.73028	0.007314	1000	0.007568	0.068479
apo	111	120	KAGGAYVPID	8	989.518	7.66246	0.004552	0	0	0
apo	111	120	KAGGAYVPID	8	989.518	7.70839	0.004373	10	0.0279	0.048796
apo	111	120	KAGGAYVPID	8	989.518	7.70199	0.002171	30	-0.004294	0.04981
apo	111	120	KAGGAYVPID	8	989.518	7.70871	0.000203	95	0.015712	0.060925
apo	111	120	KAGGAYVPID	8	989.518	7.71634	0.001228	1000	0.150962	0.053855
ATP-Phe	111	132	KAGGAYVPIDIEYPKERIQYIL	19	2535.37	9.4512	0.001656	0	0	0
ATP-Phe	111	132	KAGGAYVPIDIEYPKERIQYIL	19	2535.37	9.5077	0.009994	10	1.11942	0.019722
ATP-Phe	111	132	KAGGAYVPIDIEYPKERIQYIL	19	2535.37	9.50555	0.002733	30	1.22165	0.035154
ATP-Phe	111	132	KAGGAYVPIDIEYPKERIQYIL	19	2535.37	9.51346	0.003412	95	1.37278	0.0136
ATP-Phe	111	132	KAGGAYVPIDIEYPKERIQYIL	19	2535.37	9.51571	0.006718	1000	1.77985	0.039371
ATP-Phe-PPi	111	132	KAGGAYVPIDIEYPKERIQYIL	19	2535.37	9.46094	0.001923	0	0	0
ATP-Phe-PPi	111	132	KAGGAYVPIDIEYPKERIQYIL	19	2535.37	9.51045	0.007762	10	1.17222	0.022512
ATP-Phe-PPi	111	132	KAGGAYVPIDIEYPKERIQYIL	19	2535.37	9.50604	0.006603	30	1.29116	0.018712
ATP-Phe-PPi	111	132	KAGGAYVPIDIEYPKERIQYIL	19	2535.37	9.49911	0.004691	95	1.34471	0.030093
ATP-Phe-PPi	111	132	KAGGAYVPIDIEYPKERIQYIL	19	2535.37	9.49273	0.007339	1000	1.85453	0.077249
apo	111	132	KAGGAYVPIDIEYPKERIQYIL	19	2535.37	9.4726	0.005973	0	0	0
apo	111	132	KAGGAYVPIDIEYPKERIQYIL	19	2535.37	9.51402	0.001769	10	1.27038	0.036765
apo	111	132	KAGGAYVPIDIEYPKERIQYIL	19	2535.37	9.51671	0.004351	30	1.37021	0.037202
apo	111	132	KAGGAYVPIDIEYPKERIQYIL	19	2535.37	9.51312	0.001708	95	1.49621	0.039339
apo	111	132	KAGGAYVPIDIEYPKERIQYIL	19	2535.37	9.52272	0.004496	1000	2.1873	0.05183
ATP-Phe	121	130	IEYPKERIQY	8	1337.7	7.80599	0.003774	0	0	0
ATP-Phe	121	130	IEYPKERIQY	8	1337.7	7.86741	0.004336	10	1.12116	0.027595
ATP-Phe	121	130	IEYPKERIQY	8	1337.7	7.87576	0.008483	30	1.24018	0.040848
ATP-Phe	121	130	IEYPKERIQY	8	1337.7	7.87858	0.005834	95	1.4149	0.01071
ATP-Phe	121	130	IEYPKERIQY	8	1337.7	7.88985	0.002137	1000	1.68851	0.047877
ATP-Phe-PPi	121	130	IEYPKERIQY	8	1337.7	7.8124	0.007599	0	0	0
ATP-Phe-PPi	121	130	IEYPKERIQY	8	1337.7	7.85999	0.003721	10	1.20628	0.049352
ATP-Phe-PPi	121	130	IEYPKERIQY	8	1337.7	7.87178	0.007774	30	1.33835	0.026264
ATP-Phe-PPi	121	130	IEYPKERIQY	8	1337.7	7.87886	0.006088	95	1.4498	0.023131
ATP-Phe-PPi	121	130	IEYPKERIQY	8	1337.7	7.88081	0.008583	1000	1.73428	0.066848
apo	121	130	IEYPKERIQY	8	1337.7	7.80394	0.004478	0	0	0
apo	121	130	IEYPKERIQY	8	1337.7	7.86017	0.004457	10	1.17149	0.03717
apo	121	130	IEYPKERIQY	8	1337.7	7.85592	0.003081	30	1.29518	0.04318
apo	121	130	IEYPKERIQY	8	1337.7	7.86161	0.001043	95	1.49283	0.042776
apo	121	130	IEYPKERIQY	8	1337.7	7.87271	0.003204	1000	1.90149	0.031224
ATP-Phe	124	132	PKERIQYIL	7	1158.68	8.71441	0.001889	0	0	0
ATP-Phe	124	132	PKERIQYIL	7	1158.68	8.79536	0.00967	10	0.381298	0.017151
ATP-Phe	124	132	PKERIQYIL	7	1158.68	8.79893	0.006322	30	0.47831	0.039137
ATP-Phe	124	132	PKERIQYIL	7	1158.68	8.80607	0.00357	95	0.582172	0.021651
ATP-Phe	124	132	PKERIQYIL	7	1158.68	8.81939	0.002644	1000	0.749796	0.025671
ATP-Phe-PPi	124	132	PKERIQYIL	7	1158.68	8.7206	0.004032	0	0	0
ATP-Phe-PPi	124	132	PKERIQYIL	7	1158.68	8.78675	0.00406	10	0.523486	0.084268
ATP-Phe-PPi	124	132	PKERIQYIL	7	1158.68	8.78998	0.007053	30	0.628438	0.071846
ATP-Phe-PPi	124	132	PKERIQYIL	7	1158.68	8.79903	0.002853	95	0.696592	0.073801
ATP-Phe-PPi	124	132	PKERIQYIL	7	1158.68	8.80069	0.008344	1000	0.927396	0.084855
apo	124	132	PKERIQYIL	7	1158.68	8.72928	0.004763	0	0	0
apo	124	132	PKERIQYIL	7	1158.68	8.78892	0.007042	10	0.454599	0.036685
apo	124	132	PKERIQYIL	7	1158.68	8.7887	0.006876	30	0.568542	0.011641
apo	124	132	PKERIQYIL	7	1158.68	8.79273	0.00378	95	0.615643	0.022609
apo	124	132	PKERIQYIL	7	1158.68	8.79749	0.003501	1000	0.963311	0.041848
ATP-Phe	127	132	RIQYIL	5	804.485	9.27434	0.003614	0	0	0
ATP-Phe	127	132	RIQYIL	5	804.485	9.35512	0.008526	10	-0.01366	0.022645
ATP-Phe	127	132	RIQYIL	5	804.485	9.35604	0.001878	30	-0.015951	0.010475
ATP-Phe	127	132	RIQYIL	5	804.485	9.36158	0.002158	95	-0.010505	0.020053
ATP-Phe	127	132	RIQYIL	5	804.485	9.36882	0.003459	1000	-0.012676	0.013682
ATP-Phe-PPi	127	132	RIQYIL	5	804.485	9.28313	0.003288	0	0	0
ATP-Phe-PPi	127	132	RIQYIL	5	804.485	9.34983	0.004505	10	0.006508	0.015593
ATP-Phe-PPi	127	132	RIQYIL	5	804.485	9.35153	0.004191	30	0.010912	0.008247
ATP-Phe-PPi	127	132	RIQYIL	5	804.485	9.35424	0.00095	95	0.001119	0.019105
ATP-Phe-PPi	127	132	RIQYIL	5	804.485	9.35011	0.005012	1000	-0.00105	0.011532
apo	127	132	RIQYIL	5	804.485	9.30143	0.005167	0	0	0
apo	127	132	RIQYIL	5	804.485	9.35866	0.005789	10	-0.005739	0.00246
apo	127	132	RIQYIL	5	804.485	9.3598	0.002722	30	-0.006322	0.005216
apo	127	132	RIQYIL	5	804.485	9.35964	0.001402	95	-0.006502	0.012668
apo	127	132	RIQYIL	5	804.485	9.36537	0.003638	1000	0.010542	0.009527
ATP-Phe	131	139	ILDDSQARM	8	1047.5	7.65198	0.00342	0	0	0
ATP-Phe	131	139	ILDDSQARM	8	1047.5	7.70429	0.005189	10	0.197631	0.015646
ATP-Phe	131	139	ILDDSQARM	8	1047.5	7.70924	0.006178	30	0.305324	0.023341
ATP-Phe	131	139	ILDDSQARM	8	1047.5	7.71043	0.004802	95	0.516147	0.015206
ATP-Phe	131	139	ILDDSQARM	8	1047.5	7.71758	0.00323	1000	0.818645	0.010992
ATP-Phe-PPi	131	139	ILDDSQARM	8	1047.5	7.65476	0.003154	0	0	0
ATP-Phe-PPi	131	139	ILDDSQARM	8	1047.5	7.69454	0.003343	10	0.291809	0.016422
ATP-Phe-PPi	131	139	ILDDSQARM	8	1047.5	7.70603	0.008813	30	0.416588	0.015647
ATP-Phe-PPi	131	139	ILDDSQARM	8	1047.5	7.71239	0.007475	95	0.698693	0.01417
ATP-Phe-PPi	131	139	ILDDSQARM	8	1047.5	7.71372	0.00671	1000	0.81148	0.029633
apo	131	139	ILDDSQARM	8	1047.5	7.64273	0.002383	0	0	0
apo	131	139	ILDDSQARM	8	1047.5	7.69107	0.004045	10	0.209942	0.01628
apo	131	139	ILDDSQARM	8	1047.5	7.68495	0.003599	30	0.319842	0.01875
apo	131	139	ILDDSQARM	8	1047.5	7.69146	0.000846	95	0.551867	0.021178
apo	131	139	ILDDSQARM	8	1047.5	7.69919	0.000963	1000	0.843916	0.01712
ATP-Phe	133	139	DDSQARM	6	821.333	6.34448	0.006046	0	0	0
ATP-Phe	133	139	DDSQARM	6	821.333	6.38477	0.006818	10	0.181904	0.017308
ATP-Phe	133	139	DDSQARM	6	821.333	6.39012	0.005064	30	0.253446	0.018198
ATP-Phe	133	139	DDSQARM	6	821.333	6.38629	0.00737	95	0.441766	0.024346
ATP-Phe	133	139	DDSQARM	6	821.333	6.38257	0.005268	1000	0.746631	0.023662
ATP-Phe-PPi	133	139	DDSQARM	6	821.333	6.33598	0.011696	0	0	0
ATP-Phe-PPi	133	139	DDSQARM	6	821.333	6.35966	0.009544	10	0.242429	0.014671
ATP-Phe-PPi	133	139	DDSQARM	6	821.333	6.37953	0.012232	30	0.347712	0.015352
ATP-Phe-PPi	133	139	DDSQARM	6	821.333	6.39009	0.017237	95	0.571692	0.029299
ATP-Phe-PPi	133	139	DDSQARM	6	821.333	6.38838	0.025057	1000	0.7181	0.03367
apo	133	139	DDSQARM	6	821.333	6.33752	0.01049	0	0	0
apo	133	139	DDSQARM	6	821.333	6.37713	0.004727	10	0.164914	0.016341
apo	133	139	DDSQARM	6	821.333	6.36117	0.012377	30	0.213058	0.025099
apo	133	139	DDSQARM	6	821.333	6.37662	0.001198	95	0.434412	0.013524
apo	133	139	DDSQARM	6	821.333	6.38765	0.002783	1000	0.764434	0.014599
ATP-Phe	134	139	DSQARM	5	706.306	6.11324	0.003206	0	0	0
ATP-Phe	134	139	DSQARM	5	706.306	6.12988	0.002321	10	0.172539	0.012708
ATP-Phe	134	139	DSQARM	5	706.306	6.13481	0.004054	30	0.221411	0.013854
ATP-Phe	134	139	DSQARM	5	706.306	6.13139	0.005871	95	0.416151	0.032952
ATP-Phe	134	139	DSQARM	5	706.306	6.12557	0.000523	1000	0.669963	0.021458
ATP-Phe-PPi	134	139	DSQARM	5	706.306	6.03998	0.080883	0	0	0
ATP-Phe-PPi	134	139	DSQARM	5	706.306	6.06369	0.033782	10	0.129471	0.068745
ATP-Phe-PPi	134	139	DSQARM	5	706.306	6.1019	0.029647	30	0.231193	0.068532
ATP-Phe-PPi	134	139	DSQARM	5	706.306	6.11908	0.021819	95	0.457083	0.0667
ATP-Phe-PPi	134	139	DSQARM	5	706.306	6.1468	0.039129	1000	0.577772	0.069181
apo	134	139	DSQARM	5	706.306	6.08872	0.010102	0	0	0
apo	134	139	DSQARM	5	706.306	6.116	0.006991	10	0.22558	0.025206
apo	134	139	DSQARM	5	706.306	6.09989	0.017254	30	0.278118	0.040717
apo	134	139	DSQARM	5	706.306	6.1127	0.002131	95	0.4942	0.023408
apo	134	139	DSQARM	5	706.306	6.12139	0.003386	1000	0.75065	0.023129
ATP-Phe	140	149	LLTQKHLVHL	9	1200.73	7.53097	0.001901	0	0	0
ATP-Phe	140	149	LLTQKHLVHL	9	1200.73	7.59145	0.005091	10	0.606593	0.028502
ATP-Phe	140	149	LLTQKHLVHL	9	1200.73	7.5937	0.006331	30	0.721379	0.027347
ATP-Phe	140	149	LLTQKHLVHL	9	1200.73	7.59318	0.004183	95	0.970511	0.029811
ATP-Phe	140	149	LLTQKHLVHL	9	1200.73	7.59686	0.002139	1000	1.67693	0.061477
ATP-Phe-PPi	140	149	LLTQKHLVHL	9	1200.73	7.53613	0.004762	0	0	0
ATP-Phe-PPi	140	149	LLTQKHLVHL	9	1200.73	7.58705	0.002951	10	0.621383	0.030413
ATP-Phe-PPi	140	149	LLTQKHLVHL	9	1200.73	7.59439	0.011035	30	0.749429	0.017349
ATP-Phe-PPi	140	149	LLTQKHLVHL	9	1200.73	7.59006	0.00785	95	1.01324	0.022498
ATP-Phe-PPi	140	149	LLTQKHLVHL	9	1200.73	7.58536	0.005938	1000	1.79252	0.0257
apo	140	149	LLTQKHLVHL	9	1200.73	7.50975	0.003123	0	0	0
apo	140	149	LLTQKHLVHL	9	1200.73	7.56952	0.005157	10	0.577492	0.033032
apo	140	149	LLTQKHLVHL	9	1200.73	7.56087	0.003895	30	0.678462	0.019571
apo	140	149	LLTQKHLVHL	9	1200.73	7.56733	0.001476	95	0.870633	0.02093
apo	140	149	LLTQKHLVHL	9	1200.73	7.57502	0.00203	1000	1.60232	0.044892
ATP-Phe	140	155	LLTQKHLVHLIHNIQF	15	1953.13	8.96019	0.014439	0	0	0
ATP-Phe	140	155	LLTQKHLVHLIHNIQF	15	1953.13	8.99877	0.002131	10	1.76954	0.055659
ATP-Phe	140	155	LLTQKHLVHLIHNIQF	15	1953.13	8.99812	0.003852	30	1.98171	0.041833
ATP-Phe	140	155	LLTQKHLVHLIHNIQF	15	1953.13	9.00486	0.003497	95	2.3845	0.05473
ATP-Phe	140	155	LLTQKHLVHLIHNIQF	15	1953.13	8.99648	0.005322	1000	3.59706	0.096076
ATP-Phe-PPi	140	155	LLTQKHLVHLIHNIQF	15	1953.13	8.97079	0.007061	0	0	0
ATP-Phe-PPi	140	155	LLTQKHLVHLIHNIQF	15	1953.13	9.02223	0.013368	10	1.97744	0.073344
ATP-Phe-PPi	140	155	LLTQKHLVHLIHNIQF	15	1953.13	9.02686	0.004937	30	2.21421	0.061912
ATP-Phe-PPi	140	155	LLTQKHLVHLIHNIQF	15	1953.13	9.01574	0.001762	95	2.62181	0.056357
ATP-Phe-PPi	140	155	LLTQKHLVHLIHNIQF	15	1953.13	8.98812	0.01159	1000	3.97952	0.067585
apo	140	155	LLTQKHLVHLIHNIQF	15	1953.13	8.90678	0.004443	0	0	0
apo	140	155	LLTQKHLVHLIHNIQF	15	1953.13	8.95403	0.007576	10	1.7689	0.042362
apo	140	155	LLTQKHLVHLIHNIQF	15	1953.13	8.94379	0.006313	30	2.043	0.069907
apo	140	155	LLTQKHLVHLIHNIQF	15	1953.13	8.95364	0.007943	95	2.33717	0.03193
apo	140	155	LLTQKHLVHLIHNIQF	15	1953.13	8.95424	0.002224	1000	3.66843	0.050918
ATP-Phe	140	161	LLTQKHLVHLIHNIQFNGQVEI	21	2593.45	9.10501	0.001092	0	0	0
ATP-Phe	140	161	LLTQKHLVHLIHNIQFNGQVEI	21	2593.45	9.14495	0.005682	10	2.93905	0.047327
ATP-Phe	140	161	LLTQKHLVHLIHNIQFNGQVEI	21	2593.45	9.13867	0.00266	30	3.47051	0.058153
ATP-Phe	140	161	LLTQKHLVHLIHNIQFNGQVEI	21	2593.45	9.14716	0.001901	95	4.27771	0.030081
ATP-Phe	140	161	LLTQKHLVHLIHNIQFNGQVEI	21	2593.45	9.1381	0.006143	1000	6.45228	0.119751
ATP-Phe-PPi	140	161	LLTQKHLVHLIHNIQFNGQVEI	21	2593.45	9.13115	0.006543	0	0	0
ATP-Phe-PPi	140	161	LLTQKHLVHLIHNIQFNGQVEI	21	2593.45	9.15867	0.007977	10	3.11975	0.074936
ATP-Phe-PPi	140	161	LLTQKHLVHLIHNIQFNGQVEI	21	2593.45	9.15882	0.005345	30	3.63299	0.063473
ATP-Phe-PPi	140	161	LLTQKHLVHLIHNIQFNGQVEI	21	2593.45	9.15021	0.000826	95	4.44948	0.082776
ATP-Phe-PPi	140	161	LLTQKHLVHLIHNIQFNGQVEI	21	2593.45	9.12814	0.006938	1000	6.68866	0.080938
apo	140	161	LLTQKHLVHLIHNIQFNGQVEI	21	2593.45	9.0904	0.002068	0	0	0
apo	140	161	LLTQKHLVHLIHNIQFNGQVEI	21	2593.45	9.11192	0.004258	10	3.02425	0.105562
apo	140	161	LLTQKHLVHLIHNIQFNGQVEI	21	2593.45	9.10842	0.001667	30	3.56482	0.129872
apo	140	161	LLTQKHLVHLIHNIQFNGQVEI	21	2593.45	9.1093	0.00641	95	4.3445	0.070131
apo	140	161	LLTQKHLVHLIHNIQFNGQVEI	21	2593.45	9.11259	0.004578	1000	6.6223	0.048967
ATP-Phe	156	162	NGQVEIF	6	805.397	9.58887	0.003014	0	0	0
ATP-Phe	156	162	NGQVEIF	6	805.397	9.62434	0.009969	10	0.293672	0.013595
ATP-Phe	156	162	NGQVEIF	6	805.397	9.62173	0.001546	30	0.40668	0.024011
ATP-Phe	156	162	NGQVEIF	6	805.397	9.62925	0.002122	95	0.735209	0.022046
ATP-Phe	156	162	NGQVEIF	6	805.397	9.63466	0.005346	1000	1.31765	0.03618
ATP-Phe-PPi	156	162	NGQVEIF	6	805.397	9.59914	0.004499	0	0	0
ATP-Phe-PPi	156	162	NGQVEIF	6	805.397	9.62287	0.004343	10	0.283181	0.017387
ATP-Phe-PPi	156	162	NGQVEIF	6	805.397	9.62	0.00493	30	0.461916	0.007586
ATP-Phe-PPi	156	162	NGQVEIF	6	805.397	9.6193	0.003254	95	0.754989	0.005157
ATP-Phe-PPi	156	162	NGQVEIF	6	805.397	9.61632	0.007619	1000	1.4545	0.028491
apo	156	162	NGQVEIF	6	805.397	9.61035	0.004364	0	0	0
apo	156	162	NGQVEIF	6	805.397	9.63132	0.004593	10	0.323102	0.016037
apo	156	162	NGQVEIF	6	805.397	9.6324	0.002496	30	0.465709	0.034968
apo	156	162	NGQVEIF	6	805.397	9.63219	0.002186	95	0.780676	0.016103
apo	156	162	NGQVEIF	6	805.397	9.63641	0.004528	1000	1.46895	0.019155
ATP-Phe	159	162	VEIF	3	506.274	9.69763	0.004121	0	0	0
ATP-Phe	159	162	VEIF	3	506.274	9.74897	0.009296	10	0.06584	0.01001
ATP-Phe	159	162	VEIF	3	506.274	9.74723	0.002074	30	0.108194	0.012961
ATP-Phe	159	162	VEIF	3	506.274	9.75315	0.002048	95	0.185052	0.01355
ATP-Phe	159	162	VEIF	3	506.274	9.75843	0.004913	1000	0.42895	0.023348
ATP-Phe-PPi	159	162	VEIF	3	506.274	9.70982	0.004257	0	0	0
ATP-Phe-PPi	159	162	VEIF	3	506.274	9.74289	0.005156	10	0.106538	0.016325
ATP-Phe-PPi	159	162	VEIF	3	506.274	9.74501	0.004495	30	0.139782	0.014097
ATP-Phe-PPi	159	162	VEIF	3	506.274	9.74555	0.003716	95	0.180188	0.01704
ATP-Phe-PPi	159	162	VEIF	3	506.274	9.73772	0.006421	1000	0.497792	0.015138
apo	159	162	VEIF	3	506.274	9.72258	0.007299	0	0	0
apo	159	162	VEIF	3	506.274	9.75346	0.003668	10	0.118981	0.009619
apo	159	162	VEIF	3	506.274	9.75385	0.002991	30	0.13493	0.024039
apo	159	162	VEIF	3	506.274	9.75482	0.001101	95	0.189761	0.007499
apo	159	162	VEIF	3	506.274	9.75722	0.00557	1000	0.525153	0.005062
ATP-Phe	162	165	FEED	3	538.191	6.6975	0.006176	0	0	0
ATP-Phe	162	165	FEED	3	538.191	6.74295	0.004906	10	0.817865	0.011782
ATP-Phe	162	165	FEED	3	538.191	6.74969	0.005993	30	0.843106	0.009082
ATP-Phe	162	165	FEED	3	538.191	6.75034	0.005924	95	0.823275	0.014647
ATP-Phe	162	165	FEED	3	538.191	6.75218	0.00681	1000	0.833977	0.015833
ATP-Phe-PPi	162	165	FEED	3	538.191	6.69461	0.009593	0	0	0
ATP-Phe-PPi	162	165	FEED	3	538.191	6.72776	0.005485	10	0.820814	0.018703
ATP-Phe-PPi	162	165	FEED	3	538.191	6.74434	0.010227	30	0.820375	0.016699
ATP-Phe-PPi	162	165	FEED	3	538.191	6.75616	0.01356	95	0.79982	0.01684
ATP-Phe-PPi	162	165	FEED	3	538.191	6.75779	0.017766	1000	0.821544	0.016634
apo	162	165	FEED	3	538.191	6.68047	0.006754	0	0	0
apo	162	165	FEED	3	538.191	6.72855	0.003255	10	0.844958	0.022185
apo	162	165	FEED	3	538.191	6.7176	0.006547	30	0.844348	0.00695
apo	162	165	FEED	3	538.191	6.72945	0.00099	95	0.832756	0.008419
apo	162	165	FEED	3	538.191	6.73903	0.002155	1000	0.852738	0.015301
ATP-Phe	162	183	FEEDTIKIREGTNLHVPSKSTD	20	2515.25	7.59911	0.001898	0	0	0
ATP-Phe	162	183	FEEDTIKIREGTNLHVPSKSTD	20	2515.25	7.64126	0.005408	10	3.87279	0.041401
ATP-Phe	162	183	FEEDTIKIREGTNLHVPSKSTD	20	2515.25	7.64292	0.004759	30	4.58153	0.047479
ATP-Phe	162	183	FEEDTIKIREGTNLHVPSKSTD	20	2515.25	7.64404	0.003434	95	5.8833	0.050737
ATP-Phe	162	183	FEEDTIKIREGTNLHVPSKSTD	20	2515.25	7.64657	0.000243	1000	8.41902	0.068533
ATP-Phe-PPi	162	183	FEEDTIKIREGTNLHVPSKSTD	20	2515.25	7.60322	0.003115	0	0	0
ATP-Phe-PPi	162	183	FEEDTIKIREGTNLHVPSKSTD	20	2515.25	7.63623	0.002532	10	3.90462	0.06925
ATP-Phe-PPi	162	183	FEEDTIKIREGTNLHVPSKSTD	20	2515.25	7.64508	0.009021	30	4.69863	0.036752
ATP-Phe-PPi	162	183	FEEDTIKIREGTNLHVPSKSTD	20	2515.25	7.64537	0.006988	95	5.99768	0.05342
ATP-Phe-PPi	162	183	FEEDTIKIREGTNLHVPSKSTD	20	2515.25	7.64276	0.004941	1000	8.46155	0.074754
apo	162	183	FEEDTIKIREGTNLHVPSKSTD	20	2515.25	7.59405	0.000951	0	0	0
apo	162	183	FEEDTIKIREGTNLHVPSKSTD	20	2515.25	7.63171	0.003139	10	4.07924	0.095241
apo	162	183	FEEDTIKIREGTNLHVPSKSTD	20	2515.25	7.62519	0.00268	30	4.84673	0.115898
apo	162	183	FEEDTIKIREGTNLHVPSKSTD	20	2515.25	7.63066	0.001969	95	6.2362	0.044622
apo	162	183	FEEDTIKIREGTNLHVPSKSTD	20	2515.25	7.63778	0.001279	1000	8.74801	0.040816
ATP-Phe	163	174	EEDTIKIREGTN	11	1403.69	6.89903	0.003737	0	0	0
ATP-Phe	163	174	EEDTIKIREGTN	11	1403.69	6.95112	0.005984	10	2.56672	0.057564
ATP-Phe	163	174	EEDTIKIREGTN	11	1403.69	6.95991	0.00612	30	3.08851	0.066405
ATP-Phe	163	174	EEDTIKIREGTN	11	1403.69	6.95836	0.004904	95	3.97851	0.084203
ATP-Phe	163	174	EEDTIKIREGTN	11	1403.69	6.95959	0.005702	1000	5.47132	0.12338
ATP-Phe-PPi	163	174	EEDTIKIREGTN	11	1403.69	6.90427	0.003124	0	0	0
ATP-Phe-PPi	163	174	EEDTIKIREGTN	11	1403.69	6.94172	0.005407	10	2.55186	0.053387
ATP-Phe-PPi	163	174	EEDTIKIREGTN	11	1403.69	6.95455	0.009648	30	3.17335	0.03511
ATP-Phe-PPi	163	174	EEDTIKIREGTN	11	1403.69	6.9614	0.009925	95	4.12168	0.028471
ATP-Phe-PPi	163	174	EEDTIKIREGTN	11	1403.69	6.96063	0.008683	1000	5.48656	0.149886
apo	163	174	EEDTIKIREGTN	11	1403.69	6.88778	0.003733	0	0	0
apo	163	174	EEDTIKIREGTN	11	1403.69	6.93835	0.003705	10	2.70865	0.053174
apo	163	174	EEDTIKIREGTN	11	1403.69	6.93096	0.003719	30	3.2676	0.056851
apo	163	174	EEDTIKIREGTN	11	1403.69	6.94101	0.002341	95	4.28688	0.059064
apo	163	174	EEDTIKIREGTN	11	1403.69	6.94493	0.002289	1000	5.75671	0.025063
ATP-Phe	163	183	EEDTIKIREGTNLHVPSKSTD	19	2368.19	7.25496	0.004056	0	0	0
ATP-Phe	163	183	EEDTIKIREGTNLHVPSKSTD	19	2368.19	7.2863	0.004072	10	3.59603	0.04193
ATP-Phe	163	183	EEDTIKIREGTNLHVPSKSTD	19	2368.19	7.28956	0.003362	30	4.3281	0.040982
ATP-Phe	163	183	EEDTIKIREGTNLHVPSKSTD	19	2368.19	7.28844	0.003785	95	5.62073	0.067332
ATP-Phe	163	183	EEDTIKIREGTNLHVPSKSTD	19	2368.19	7.28743	0.003932	1000	8.09599	0.1059
ATP-Phe-PPi	163	183	EEDTIKIREGTNLHVPSKSTD	19	2368.19	7.25954	0.003201	0	0	0
ATP-Phe-PPi	163	183	EEDTIKIREGTNLHVPSKSTD	19	2368.19	7.28026	0.003129	10	3.6936	0.068779
ATP-Phe-PPi	163	183	EEDTIKIREGTNLHVPSKSTD	19	2368.19	7.28551	0.00898	30	4.42469	0.025948
ATP-Phe-PPi	163	183	EEDTIKIREGTNLHVPSKSTD	19	2368.19	7.28425	0.007849	95	5.62072	0.155613
ATP-Phe-PPi	163	183	EEDTIKIREGTNLHVPSKSTD	19	2368.19	7.28104	0.003954	1000	8.11186	0.022479
apo	163	183	EEDTIKIREGTNLHVPSKSTD	19	2368.19	7.24294	0.001244	0	0	0
apo	163	183	EEDTIKIREGTNLHVPSKSTD	19	2368.19	7.2719	0.00492	10	3.83101	0.101203
apo	163	183	EEDTIKIREGTNLHVPSKSTD	19	2368.19	7.26395	0.004193	30	4.47413	0.073865
apo	163	183	EEDTIKIREGTNLHVPSKSTD	19	2368.19	7.27107	0.00237	95	5.92564	0.024115
apo	163	183	EEDTIKIREGTNLHVPSKSTD	19	2368.19	7.27637	0.001977	1000	8.62776	0.09082
ATP-Phe	163	185	EEDTIKIREGTNLHVPSKSTDLA	21	2552.31	7.6234	0.003546	0	0	0
ATP-Phe	163	185	EEDTIKIREGTNLHVPSKSTDLA	21	2552.31	7.66621	0.005541	10	3.49254	0.037265
ATP-Phe	163	185	EEDTIKIREGTNLHVPSKSTDLA	21	2552.31	7.66917	0.005366	30	4.12906	0.066617
ATP-Phe	163	185	EEDTIKIREGTNLHVPSKSTDLA	21	2552.31	7.67034	0.00408	95	5.5527	0.075789
ATP-Phe	163	185	EEDTIKIREGTNLHVPSKSTDLA	21	2552.31	7.67413	0.002251	1000	8.16885	0.108961
ATP-Phe-PPi	163	185	EEDTIKIREGTNLHVPSKSTDLA	21	2552.31	7.6277	0.003269	0	0	0
ATP-Phe-PPi	163	185	EEDTIKIREGTNLHVPSKSTDLA	21	2552.31	7.66222	0.003223	10	3.57166	0.041746
ATP-Phe-PPi	163	185	EEDTIKIREGTNLHVPSKSTDLA	21	2552.31	7.67273	0.009007	30	4.26702	0.064204
ATP-Phe-PPi	163	185	EEDTIKIREGTNLHVPSKSTDLA	21	2552.31	7.67436	0.006237	95	5.65775	0.017323
ATP-Phe-PPi	163	185	EEDTIKIREGTNLHVPSKSTDLA	21	2552.31	7.67094	0.003298	1000	8.06139	0.010822
apo	163	185	EEDTIKIREGTNLHVPSKSTDLA	21	2552.31	7.62065	0.001305	0	0	0
apo	163	185	EEDTIKIREGTNLHVPSKSTDLA	21	2552.31	7.65817	0.003459	10	3.70482	0.051208
apo	163	185	EEDTIKIREGTNLHVPSKSTDLA	21	2552.31	7.6521	0.000324	30	4.39739	0.082983
apo	163	185	EEDTIKIREGTNLHVPSKSTDLA	21	2552.31	7.65868	0.001568	95	5.82892	0.069993
apo	163	185	EEDTIKIREGTNLHVPSKSTDLA	21	2552.31	7.66483	0.001357	1000	8.36526	0.02876
ATP-Phe	166	174	TIKIREGTN	8	1030.58	6.36287	0.006806	0	0	0
ATP-Phe	166	174	TIKIREGTN	8	1030.58	6.39656	0.005814	10	2.0756	0.037412
ATP-Phe	166	174	TIKIREGTN	8	1030.58	6.39782	0.00259	30	2.52402	0.043974
ATP-Phe	166	174	TIKIREGTN	8	1030.58	6.39231	0.004699	95	3.25515	0.08334
ATP-Phe	166	174	TIKIREGTN	8	1030.58	6.38358	0.006029	1000	4.20538	0.060045
ATP-Phe-PPi	166	174	TIKIREGTN	8	1030.58	6.35403	0.007053	0	0	0
ATP-Phe-PPi	166	174	TIKIREGTN	8	1030.58	6.37908	0.002362	10	2.10935	0.036536
ATP-Phe-PPi	166	174	TIKIREGTN	8	1030.58	6.39564	0.01177	30	2.60446	0.024677
ATP-Phe-PPi	166	174	TIKIREGTN	8	1030.58	6.39462	0.010117	95	3.316	0.020058
ATP-Phe-PPi	166	174	TIKIREGTN	8	1030.58	6.37922	0.010617	1000	4.17138	0.075359
apo	166	174	TIKIREGTN	8	1030.58	6.35669	0.003094	0	0	0
apo	166	174	TIKIREGTN	8	1030.58	6.39279	0.00511	10	2.19314	0.029509
apo	166	174	TIKIREGTN	8	1030.58	6.37855	0.009169	30	2.60807	0.054675
apo	166	174	TIKIREGTN	8	1030.58	6.39065	0.001783	95	3.39372	0.025053
apo	166	174	TIKIREGTN	8	1030.58	6.39917	0.000212	1000	4.36853	0.046658
ATP-Phe	166	175	TIKIREGTNL	9	1143.66	7.40617	0.003307	0	0	0
ATP-Phe	166	175	TIKIREGTNL	9	1143.66	7.46741	0.007917	10	2.17268	0.092349
ATP-Phe	166	175	TIKIREGTNL	9	1143.66	7.47572	0.007894	30	2.55209	0.130209
ATP-Phe	166	175	TIKIREGTNL	9	1143.66	7.47487	0.005398	95	3.41926	0.120247
ATP-Phe	166	175	TIKIREGTNL	9	1143.66	7.48181	0.003836	1000	4.85619	0.193246
ATP-Phe-PPi	166	175	TIKIREGTNL	9	1143.66	7.41039	0.005801	0	0	0
ATP-Phe-PPi	166	175	TIKIREGTNL	9	1143.66	7.46263	0.004096	10	2.12778	0.034257
ATP-Phe-PPi	166	175	TIKIREGTNL	9	1143.66	7.471	0.009805	30	2.66214	0.02563
ATP-Phe-PPi	166	175	TIKIREGTNL	9	1143.66	7.47424	0.007797	95	3.49314	0.063947
ATP-Phe-PPi	166	175	TIKIREGTNL	9	1143.66	7.47286	0.006005	1000	4.76639	0.134253
apo	166	175	TIKIREGTNL	9	1143.66	7.39798	0.001175	0	0	0
apo	166	175	TIKIREGTNL	9	1143.66	7.45856	0.005156	10	2.32454	0.112322
apo	166	175	TIKIREGTNL	9	1143.66	7.45014	0.003718	30	2.85628	0.123835
apo	166	175	TIKIREGTNL	9	1143.66	7.45745	0.001353	95	3.66944	0.101021
apo	166	175	TIKIREGTNL	9	1143.66	7.4626	0.003519	1000	5.11652	0.108086
ATP-Phe	166	185	TIKIREGTNLHVPSKSTDLA	18	2179.2	7.37811	0.004175	0	0	0
ATP-Phe	166	185	TIKIREGTNLHVPSKSTDLA	18	2179.2	7.42732	0.00586	10	2.84751	0.055132
ATP-Phe	166	185	TIKIREGTNLHVPSKSTDLA	18	2179.2	7.42955	0.003649	30	3.39628	0.052809
ATP-Phe	166	185	TIKIREGTNLHVPSKSTDLA	18	2179.2	7.4271	0.003687	95	4.49922	0.070129
ATP-Phe	166	185	TIKIREGTNLHVPSKSTDLA	18	2179.2	7.42706	0.003779	1000	6.51614	0.11254
ATP-Phe-PPi	166	185	TIKIREGTNLHVPSKSTDLA	18	2179.2	7.38595	0.005022	0	0	0
ATP-Phe-PPi	166	185	TIKIREGTNLHVPSKSTDLA	18	2179.2	7.4241	0.002836	10	2.9024	0.070242
ATP-Phe-PPi	166	185	TIKIREGTNLHVPSKSTDLA	18	2179.2	7.43064	0.009156	30	3.52712	0.058922
ATP-Phe-PPi	166	185	TIKIREGTNLHVPSKSTDLA	18	2179.2	7.42692	0.007084	95	4.62205	0.044472
ATP-Phe-PPi	166	185	TIKIREGTNLHVPSKSTDLA	18	2179.2	7.42169	0.003328	1000	6.49433	0.058844
apo	166	185	TIKIREGTNLHVPSKSTDLA	18	2179.2	7.37031	0.000436	0	0	0
apo	166	185	TIKIREGTNLHVPSKSTDLA	18	2179.2	7.41615	0.004692	10	3.03379	0.091901
apo	166	185	TIKIREGTNLHVPSKSTDLA	18	2179.2	7.40814	0.00362	30	3.57639	0.047989
apo	166	185	TIKIREGTNLHVPSKSTDLA	18	2179.2	7.41327	0.001613	95	4.7766	0.034731
apo	166	185	TIKIREGTNLHVPSKSTDLA	18	2179.2	7.4173	0.001799	1000	6.84545	0.047651
ATP-Phe	166	186	TIKIREGTNLHVPSKSTDLAY	19	2342.26	7.70194	0.003018	0	0	0
ATP-Phe	166	186	TIKIREGTNLHVPSKSTDLAY	19	2342.26	7.75102	0.005108	10	2.6586	0.033631
ATP-Phe	166	186	TIKIREGTNLHVPSKSTDLAY	19	2342.26	7.75059	0.001691	30	3.19564	0.05089
ATP-Phe	166	186	TIKIREGTNLHVPSKSTDLAY	19	2342.26	7.75486	0.002167	95	4.26637	0.066488
ATP-Phe	166	186	TIKIREGTNLHVPSKSTDLAY	19	2342.26	7.74923	0.003558	1000	6.1674	0.098005
ATP-Phe-PPi	166	186	TIKIREGTNLHVPSKSTDLAY	19	2342.26	7.71272	0.003093	0	0	0
ATP-Phe-PPi	166	186	TIKIREGTNLHVPSKSTDLAY	19	2342.26	7.74771	0.003217	10	2.73978	0.055231
ATP-Phe-PPi	166	186	TIKIREGTNLHVPSKSTDLAY	19	2342.26	7.75694	0.007886	30	3.36955	0.05405
ATP-Phe-PPi	166	186	TIKIREGTNLHVPSKSTDLAY	19	2342.26	7.75312	0.006564	95	4.42563	0.074783
ATP-Phe-PPi	166	186	TIKIREGTNLHVPSKSTDLAY	19	2342.26	7.74212	0.001858	1000	6.08469	0.056979
apo	166	186	TIKIREGTNLHVPSKSTDLAY	19	2342.26	7.69406	0.003537	0	0	0
apo	166	186	TIKIREGTNLHVPSKSTDLAY	19	2342.26	7.73625	0.005529	10	2.92996	0.052922
apo	166	186	TIKIREGTNLHVPSKSTDLAY	19	2342.26	7.7248	0.004542	30	3.52605	0.07131
apo	166	186	TIKIREGTNLHVPSKSTDLAY	19	2342.26	7.73352	0.003942	95	4.64257	0.021842
apo	166	186	TIKIREGTNLHVPSKSTDLAY	19	2342.26	7.74557	0.002612	1000	6.55548	0.055885
ATP-Phe	175	185	LHVPSKSTDLA	9	1166.63	7.14833	0.003825	0	0	0
ATP-Phe	175	185	LHVPSKSTDLA	9	1166.63	7.19532	0.005945	10	0.782029	0.01733
ATP-Phe	175	185	LHVPSKSTDLA	9	1166.63	7.19896	0.005945	30	0.922514	0.033162
ATP-Phe	175	185	LHVPSKSTDLA	9	1166.63	7.19576	0.004257	95	1.21043	0.033702
ATP-Phe	175	185	LHVPSKSTDLA	9	1166.63	7.19871	0.004257	1000	1.71914	0.048457
ATP-Phe-PPi	175	185	LHVPSKSTDLA	9	1166.63	7.15052	0.004885	0	0	0
ATP-Phe-PPi	175	185	LHVPSKSTDLA	9	1166.63	7.18589	0.00376	10	0.800556	0.012769
ATP-Phe-PPi	175	185	LHVPSKSTDLA	9	1166.63	7.19552	0.008652	30	0.954568	0.02021
ATP-Phe-PPi	175	185	LHVPSKSTDLA	9	1166.63	7.19881	0.009115	95	1.18653	0.01692
ATP-Phe-PPi	175	185	LHVPSKSTDLA	9	1166.63	7.1974	0.006909	1000	1.6837	0.039983
apo	175	185	LHVPSKSTDLA	9	1166.63	7.13767	0.002444	0	0	0
apo	175	185	LHVPSKSTDLA	9	1166.63	7.18347	0.005407	10	0.835292	0.031945
apo	175	185	LHVPSKSTDLA	9	1166.63	7.1732	0.004548	30	0.979248	0.046396
apo	175	185	LHVPSKSTDLA	9	1166.63	7.18203	0.002825	95	1.3236	0.101292
apo	175	185	LHVPSKSTDLA	9	1166.63	7.18612	0.001561	1000	1.88386	0.069043
ATP-Phe	176	185	HVPSKSTDLA	8	1053.54	6.25552	0.006091	0	0	0
ATP-Phe	176	185	HVPSKSTDLA	8	1053.54	6.28241	0.007199	10	0.571215	0.021448
ATP-Phe	176	185	HVPSKSTDLA	8	1053.54	6.28361	0.003852	30	0.688745	0.01657
ATP-Phe	176	185	HVPSKSTDLA	8	1053.54	6.27911	0.007254	95	0.762206	0.016222
ATP-Phe	176	185	HVPSKSTDLA	8	1053.54	6.26732	0.007528	1000	1.00635	0.033526
ATP-Phe-PPi	176	185	HVPSKSTDLA	8	1053.54	6.23968	0.01152	0	0	0
ATP-Phe-PPi	176	185	HVPSKSTDLA	8	1053.54	6.25556	0.005442	10	0.621893	0.017599
ATP-Phe-PPi	176	185	HVPSKSTDLA	8	1053.54	6.27341	0.014766	30	0.718431	0.022975
ATP-Phe-PPi	176	185	HVPSKSTDLA	8	1053.54	6.28161	0.019077	95	0.768721	0.020141
ATP-Phe-PPi	176	185	HVPSKSTDLA	8	1053.54	6.26856	0.022968	1000	0.986431	0.048549
apo	176	185	HVPSKSTDLA	8	1053.54	6.24662	0.006819	0	0	0
apo	176	185	HVPSKSTDLA	8	1053.54	6.2849	0.008292	10	0.625517	0.02127
apo	176	185	HVPSKSTDLA	8	1053.54	6.26592	0.011559	30	0.749628	0.026273
apo	176	185	HVPSKSTDLA	8	1053.54	6.28095	0.003089	95	0.806588	0.021137
apo	176	185	HVPSKSTDLA	8	1053.54	6.28846	0.002036	1000	1.12107	0.027287
ATP-Phe	186	201	YVIYTSGTTGNPKGTM	14	1688.81	8.02193	0.003634	0	0	0
ATP-Phe	186	201	YVIYTSGTTGNPKGTM	14	1688.81	8.07377	0.00336	10	3.72454	0.049909
ATP-Phe	186	201	YVIYTSGTTGNPKGTM	14	1688.81	8.07716	0.005738	30	3.90591	0.036698
ATP-Phe	186	201	YVIYTSGTTGNPKGTM	14	1688.81	8.08134	0.004042	95	4.08458	0.038648
ATP-Phe	186	201	YVIYTSGTTGNPKGTM	14	1688.81	8.08902	0.001117	1000	5.27269	0.07704
ATP-Phe-PPi	186	201	YVIYTSGTTGNPKGTM	14	1688.81	8.02726	0.003863	0	0	0
ATP-Phe-PPi	186	201	YVIYTSGTTGNPKGTM	14	1688.81	8.06514	0.003861	10	3.71806	0.032788
ATP-Phe-PPi	186	201	YVIYTSGTTGNPKGTM	14	1688.81	8.07555	0.008109	30	3.92642	0.02775
ATP-Phe-PPi	186	201	YVIYTSGTTGNPKGTM	14	1688.81	8.081	0.005081	95	4.23734	0.044123
ATP-Phe-PPi	186	201	YVIYTSGTTGNPKGTM	14	1688.81	8.07915	0.004379	1000	5.24031	0.06735
apo	186	201	YVIYTSGTTGNPKGTM	14	1688.81	8.02471	0.004799	0	0	0
apo	186	201	YVIYTSGTTGNPKGTM	14	1688.81	8.06412	0.002612	10	4.38465	0.037489
apo	186	201	YVIYTSGTTGNPKGTM	14	1688.81	8.06104	0.002504	30	4.67305	0.035799
apo	186	201	YVIYTSGTTGNPKGTM	14	1688.81	8.06493	0.002368	95	5.00153	0.020756
apo	186	201	YVIYTSGTTGNPKGTM	14	1688.81	8.07317	0.003145	1000	5.72224	0.019256
ATP-Phe	187	201	VIYTSGTTGNPKGTM	13	1525.74	7.2958	0.006277	0	0	0
ATP-Phe	187	201	VIYTSGTTGNPKGTM	13	1525.74	7.36289	0.003192	10	3.73114	0.047022
ATP-Phe	187	201	VIYTSGTTGNPKGTM	13	1525.74	7.37024	0.006829	30	3.91457	0.033466
ATP-Phe	187	201	VIYTSGTTGNPKGTM	13	1525.74	7.3707	0.005356	95	4.16964	0.057982
ATP-Phe	187	201	VIYTSGTTGNPKGTM	13	1525.74	7.37515	0.003675	1000	5.25772	0.035244
ATP-Phe-PPi	187	201	VIYTSGTTGNPKGTM	13	1525.74	7.30071	0.00308	0	0	0
ATP-Phe-PPi	187	201	VIYTSGTTGNPKGTM	13	1525.74	7.34905	0.00832	10	3.77718	0.057792
ATP-Phe-PPi	187	201	VIYTSGTTGNPKGTM	13	1525.74	7.36243	0.006961	30	3.95568	0.04227
ATP-Phe-PPi	187	201	VIYTSGTTGNPKGTM	13	1525.74	7.36961	0.008286	95	4.30284	0.046623
ATP-Phe-PPi	187	201	VIYTSGTTGNPKGTM	13	1525.74	7.37299	0.007565	1000	5.23189	0.0719
apo	187	201	VIYTSGTTGNPKGTM	13	1525.74	7.28925	0.004206	0	0	0
apo	187	201	VIYTSGTTGNPKGTM	13	1525.74	7.34114	0.005142	10	4.45355	0.099106
apo	187	201	VIYTSGTTGNPKGTM	13	1525.74	7.33373	0.003388	30	4.78876	0.026074
apo	187	201	VIYTSGTTGNPKGTM	13	1525.74	7.34251	0.002968	95	5.09363	0.025353
apo	187	201	VIYTSGTTGNPKGTM	13	1525.74	7.35696	0.003078	1000	5.85838	0.045221
ATP-Phe	187	202	VIYTSGTTGNPKGTML	14	1638.83	8.21894	0.004847	0	0	0
ATP-Phe	187	202	VIYTSGTTGNPKGTML	14	1638.83	8.27885	0.008465	10	3.62691	0.116715
ATP-Phe	187	202	VIYTSGTTGNPKGTML	14	1638.83	8.28437	0.007269	30	3.71601	0.073121
ATP-Phe	187	202	VIYTSGTTGNPKGTML	14	1638.83	8.29129	0.005517	95	4.06671	0.03315
ATP-Phe	187	202	VIYTSGTTGNPKGTML	14	1638.83	8.29735	0.002645	1000	5.18909	0.05206
ATP-Phe-PPi	187	202	VIYTSGTTGNPKGTML	14	1638.83	8.22602	0.004285	0	0	0
ATP-Phe-PPi	187	202	VIYTSGTTGNPKGTML	14	1638.83	8.27132	0.003763	10	3.57987	0.05117
ATP-Phe-PPi	187	202	VIYTSGTTGNPKGTML	14	1638.83	8.28009	0.008331	30	3.72457	0.047761
ATP-Phe-PPi	187	202	VIYTSGTTGNPKGTML	14	1638.83	8.29019	0.006172	95	4.14723	0.060156
ATP-Phe-PPi	187	202	VIYTSGTTGNPKGTML	14	1638.83	8.28571	0.006969	1000	5.06234	0.059557
apo	187	202	VIYTSGTTGNPKGTML	14	1638.83	8.22637	0.005157	0	0	0
apo	187	202	VIYTSGTTGNPKGTML	14	1638.83	8.27258	0.005533	10	4.23193	0.068879
apo	187	202	VIYTSGTTGNPKGTML	14	1638.83	8.26889	0.001966	30	4.53366	0.083188
apo	187	202	VIYTSGTTGNPKGTML	14	1638.83	8.27329	0.003652	95	4.85	0.086995
apo	187	202	VIYTSGTTGNPKGTML	14	1638.83	8.28183	0.005136	1000	5.6175	0.040037
ATP-Phe	187	210	VIYTSGTTGNPKGTMLEHKGISNL	22	2517.29	7.90638	0.003467	0	0	0
ATP-Phe	187	210	VIYTSGTTGNPKGTMLEHKGISNL	22	2517.29	7.95594	0.00581	10	2.71129	0.0581
ATP-Phe	187	210	VIYTSGTTGNPKGTMLEHKGISNL	22	2517.29	7.9636	0.009594	30	2.89399	0.041542
ATP-Phe	187	210	VIYTSGTTGNPKGTMLEHKGISNL	22	2517.29	7.9679	0.006111	95	3.14792	0.057951
ATP-Phe	187	210	VIYTSGTTGNPKGTMLEHKGISNL	22	2517.29	7.97837	0.002963	1000	4.10974	0.092367
ATP-Phe-PPi	187	210	VIYTSGTTGNPKGTMLEHKGISNL	22	2517.29	7.91081	0.005803	0	0	0
ATP-Phe-PPi	187	210	VIYTSGTTGNPKGTMLEHKGISNL	22	2517.29	7.94886	0.002054	10	2.81814	0.058838
ATP-Phe-PPi	187	210	VIYTSGTTGNPKGTMLEHKGISNL	22	2517.29	7.965	0.009491	30	2.96949	0.042089
ATP-Phe-PPi	187	210	VIYTSGTTGNPKGTMLEHKGISNL	22	2517.29	7.97203	0.008654	95	3.24263	0.04461
ATP-Phe-PPi	187	210	VIYTSGTTGNPKGTMLEHKGISNL	22	2517.29	7.9661	0.007928	1000	4.13506	0.086069
apo	187	210	VIYTSGTTGNPKGTMLEHKGISNL	22	2517.29	7.90865	0.004704	0	0	0
apo	187	210	VIYTSGTTGNPKGTMLEHKGISNL	22	2517.29	7.9517	0.006931	10	3.39802	0.088246
apo	187	210	VIYTSGTTGNPKGTMLEHKGISNL	22	2517.29	7.9487	0.001622	30	3.61354	0.043399
apo	187	210	VIYTSGTTGNPKGTMLEHKGISNL	22	2517.29	7.95343	0.001303	95	3.96251	0.056632
apo	187	210	VIYTSGTTGNPKGTMLEHKGISNL	22	2517.29	7.96017	0.004599	1000	4.78243	0.042601
ATP-Phe	202	210	LEHKGISNL	8	1009.56	7.20601	0.001841	0	0	0
ATP-Phe	202	210	LEHKGISNL	8	1009.56	7.27432	0.004968	10	0.081245	0.015007
ATP-Phe	202	210	LEHKGISNL	8	1009.56	7.28096	0.007257	30	0.102538	0.022508
ATP-Phe	202	210	LEHKGISNL	8	1009.56	7.27935	0.005136	95	0.116058	0.021512
ATP-Phe	202	210	LEHKGISNL	8	1009.56	7.28365	0.003677	1000	0.126908	0.021416
ATP-Phe-PPi	202	210	LEHKGISNL	8	1009.56	7.20695	0.006463	0	0	0
ATP-Phe-PPi	202	210	LEHKGISNL	8	1009.56	7.26385	0.003482	10	0.133019	0.018456
ATP-Phe-PPi	202	210	LEHKGISNL	8	1009.56	7.27386	0.008431	30	0.188071	0.03372
ATP-Phe-PPi	202	210	LEHKGISNL	8	1009.56	7.27611	0.010075	95	0.180225	0.033157
ATP-Phe-PPi	202	210	LEHKGISNL	8	1009.56	7.28036	0.00874	1000	0.116494	0.027701
apo	202	210	LEHKGISNL	8	1009.56	7.19881	0.001795	0	0	0
apo	202	210	LEHKGISNL	8	1009.56	7.2638	0.004772	10	0.220451	0.03291
apo	202	210	LEHKGISNL	8	1009.56	7.25602	0.004574	30	0.180326	0.011632
apo	202	210	LEHKGISNL	8	1009.56	7.26265	0.001539	95	0.256458	0.057751
apo	202	210	LEHKGISNL	8	1009.56	7.27001	0.001633	1000	0.307545	0.102319
ATP-Phe	211	218	KVFFENSL	7	982.512	9.26335	0.003661	0	0	0
ATP-Phe	211	218	KVFFENSL	7	982.512	9.32757	0.011822	10	0.09756	0.033698
ATP-Phe	211	218	KVFFENSL	7	982.512	9.32466	0.000463	30	0.136144	0.031306
ATP-Phe	211	218	KVFFENSL	7	982.512	9.33695	0.003362	95	0.276016	0.037251
ATP-Phe	211	218	KVFFENSL	7	982.512	9.34425	0.007256	1000	0.414977	0.032628
ATP-Phe-PPi	211	218	KVFFENSL	7	982.512	9.27326	0.002286	0	0	0
ATP-Phe-PPi	211	218	KVFFENSL	7	982.512	9.32075	0.007823	10	0.123707	0.02405
ATP-Phe-PPi	211	218	KVFFENSL	7	982.512	9.32093	0.005192	30	0.208153	0.022829
ATP-Phe-PPi	211	218	KVFFENSL	7	982.512	9.32109	0.003211	95	0.334702	0.024497
ATP-Phe-PPi	211	218	KVFFENSL	7	982.512	9.31492	0.004798	1000	0.423786	0.022694
apo	211	218	KVFFENSL	7	982.512	9.28988	0.004178	0	0	0
apo	211	218	KVFFENSL	7	982.512	9.33287	0.009288	10	0.173965	0.020851
apo	211	218	KVFFENSL	7	982.512	9.33359	0.00644	30	0.232917	0.022353
apo	211	218	KVFFENSL	7	982.512	9.3357	0.00707	95	0.384855	0.011202
apo	211	218	KVFFENSL	7	982.512	9.34825	0.00349	1000	0.535515	0.013806
ATP-Phe	213	218	FFENSL	5	755.349	9.56316	0.005387	0	0	0
ATP-Phe	213	218	FFENSL	5	755.349	9.59949	0.01012	10	0.147376	0.020334
ATP-Phe	213	218	FFENSL	5	755.349	9.5983	0.001474	30	0.233581	0.021746
ATP-Phe	213	218	FFENSL	5	755.349	9.60548	0.002264	95	0.279705	0.013927
ATP-Phe	213	218	FFENSL	5	755.349	9.61227	0.005374	1000	0.49694	0.013265
ATP-Phe-PPi	213	218	FFENSL	5	755.349	9.57429	0.004328	0	0	0
ATP-Phe-PPi	213	218	FFENSL	5	755.349	9.59696	0.004716	10	0.161439	0.026026
ATP-Phe-PPi	213	218	FFENSL	5	755.349	9.59473	0.0052	30	0.22055	0.042531
ATP-Phe-PPi	213	218	FFENSL	5	755.349	9.59549	0.003017	95	0.322209	0.046828
ATP-Phe-PPi	213	218	FFENSL	5	755.349	9.5905	0.006425	1000	0.489776	0.032959
apo	213	218	FFENSL	5	755.349	9.58726	0.004233	0	0	0
apo	213	218	FFENSL	5	755.349	9.60373	0.004967	10	0.156194	0.023566
apo	213	218	FFENSL	5	755.349	9.60435	0.002764	30	0.225441	0.040594
apo	213	218	FFENSL	5	755.349	9.60498	0.002067	95	0.321359	0.04829
apo	213	218	FFENSL	5	755.349	9.60975	0.006239	1000	0.519852	0.026983
ATP-Phe	214	218	FENSL	4	608.28	8.34393	0.004566	0	0	0
ATP-Phe	214	218	FENSL	4	608.28	8.39063	0.004551	10	0.155965	0.028111
ATP-Phe	214	218	FENSL	4	608.28	8.39701	0.004661	30	0.220471	0.029873
ATP-Phe	214	218	FENSL	4	608.28	8.40149	0.002783	95	0.358207	0.034156
ATP-Phe	214	218	FENSL	4	608.28	8.41167	0.002707	1000	0.489307	0.027829
ATP-Phe-PPi	214	218	FENSL	4	608.28	8.35165	0.004381	0	0	0
ATP-Phe-PPi	214	218	FENSL	4	608.28	8.38327	0.003643	10	0.161852	0.012948
ATP-Phe-PPi	214	218	FENSL	4	608.28	8.39571	0.007451	30	0.247294	0.013381
ATP-Phe-PPi	214	218	FENSL	4	608.28	8.40558	0.006301	95	0.363764	0.020158
ATP-Phe-PPi	214	218	FENSL	4	608.28	8.40332	0.006396	1000	0.501818	0.022992
apo	214	218	FENSL	4	608.28	8.34471	0.003154	0	0	0
apo	214	218	FENSL	4	608.28	8.37967	0.005445	10	0.151624	0.027377
apo	214	218	FENSL	4	608.28	8.37556	0.003781	30	0.220355	0.036001
apo	214	218	FENSL	4	608.28	8.38348	0.001609	95	0.39993	0.01337
apo	214	218	FENSL	4	608.28	8.39161	0.003587	1000	0.655353	0.012839
ATP-Phe	219	229	NVTEKDRIGQF	10	1305.67	7.86957	0.003173	0	0	0
ATP-Phe	219	229	NVTEKDRIGQF	10	1305.67	7.93615	0.00569	10	0.291378	0.016839
ATP-Phe	219	229	NVTEKDRIGQF	10	1305.67	7.94061	0.005347	30	0.368765	0.01133
ATP-Phe	219	229	NVTEKDRIGQF	10	1305.67	7.94339	0.00383	95	0.517064	0.022088
ATP-Phe	219	229	NVTEKDRIGQF	10	1305.67	7.95119	0.003426	1000	0.998673	0.046529
ATP-Phe-PPi	219	229	NVTEKDRIGQF	10	1305.67	7.87238	0.004586	0	0	0
ATP-Phe-PPi	219	229	NVTEKDRIGQF	10	1305.67	7.92825	0.002469	10	0.3018	0.019571
ATP-Phe-PPi	219	229	NVTEKDRIGQF	10	1305.67	7.93868	0.006842	30	0.366773	0.011611
ATP-Phe-PPi	219	229	NVTEKDRIGQF	10	1305.67	7.94381	0.007327	95	0.548702	0.01723
ATP-Phe-PPi	219	229	NVTEKDRIGQF	10	1305.67	7.94639	0.008935	1000	1.04014	0.038276
apo	219	229	NVTEKDRIGQF	10	1305.67	7.86286	0.001459	0	0	0
apo	219	229	NVTEKDRIGQF	10	1305.67	7.92439	0.003835	10	0.32226	0.020025
apo	219	229	NVTEKDRIGQF	10	1305.67	7.9212	0.003051	30	0.374556	0.013367
apo	219	229	NVTEKDRIGQF	10	1305.67	7.92582	0.0021	95	0.587566	0.033709
apo	219	229	NVTEKDRIGQF	10	1305.67	7.93474	0.001562	1000	1.11235	0.019117
ATP-Phe	220	229	VTEKDRIGQF	9	1191.62	7.81745	0.004376	0	0	0
ATP-Phe	220	229	VTEKDRIGQF	9	1191.62	7.88259	0.003984	10	0.198193	0.024212
ATP-Phe	220	229	VTEKDRIGQF	9	1191.62	7.88933	0.008435	30	0.229372	0.018416
ATP-Phe	220	229	VTEKDRIGQF	9	1191.62	7.89176	0.007971	95	0.369906	0.015953
ATP-Phe	220	229	VTEKDRIGQF	9	1191.62	7.90113	0.003453	1000	0.861869	0.057736
ATP-Phe-PPi	220	229	VTEKDRIGQF	9	1191.62	7.8209	0.005646	0	0	0
ATP-Phe-PPi	220	229	VTEKDRIGQF	9	1191.62	7.87507	0.003134	10	0.208642	0.011656
ATP-Phe-PPi	220	229	VTEKDRIGQF	9	1191.62	7.88461	0.009256	30	0.257623	0.023224
ATP-Phe-PPi	220	229	VTEKDRIGQF	9	1191.62	7.89253	0.007891	95	0.395227	0.019704
ATP-Phe-PPi	220	229	VTEKDRIGQF	9	1191.62	7.89462	0.009209	1000	0.911284	0.033191
apo	220	229	VTEKDRIGQF	9	1191.62	7.80751	0.00175	0	0	0
apo	220	229	VTEKDRIGQF	9	1191.62	7.8704	0.00652	10	0.2194	0.024843
apo	220	229	VTEKDRIGQF	9	1191.62	7.86709	0.003039	30	0.26984	0.017866
apo	220	229	VTEKDRIGQF	9	1191.62	7.8743	0.004272	95	0.428652	0.026546
apo	220	229	VTEKDRIGQF	9	1191.62	7.86973	0.033112	1000	1.01081	0.07534
ATP-Phe	235	238	DASV	3	390.175	6.0115	0.016987	0	0	0
ATP-Phe	235	238	DASV	3	390.175	6.07201	0.012486	10	-0.014725	0.017846
ATP-Phe	235	238	DASV	3	390.175	6.0846	0.006595	30	-0.019734	0.019414
ATP-Phe	235	238	DASV	3	390.175	6.08211	0.011823	95	-0.01861	0.016943
ATP-Phe	235	238	DASV	3	390.175	6.06972	0.010454	1000	-0.014833	0.018299
ATP-Phe-PPi	235	238	DASV	3	390.175	5.99085	0.034409	0	0	0
ATP-Phe-PPi	235	238	DASV	3	390.175	6.02352	0.034635	10	-0.05227	0.016483
ATP-Phe-PPi	235	238	DASV	3	390.175	6.0526	0.019183	30	-0.05787	0.015386
ATP-Phe-PPi	235	238	DASV	3	390.175	6.07841	0.028577	95	-0.057769	0.016572
ATP-Phe-PPi	235	238	DASV	3	390.175	6.09583	0.06253	1000	-0.057854	0.016804
apo	235	238	DASV	3	390.175	6.00225	0.036924	0	0	0
apo	235	238	DASV	3	390.175	6.06649	0.005827	10	0.00853	0.01406
apo	235	238	DASV	3	390.175	6.03848	0.031568	30	0.002659	0.011576
apo	235	238	DASV	3	390.175	6.06325	0.000654	95	0.005242	0.010631
apo	235	238	DASV	3	390.175	6.07111	0.00592	1000	0.036802	0.010658
ATP-Phe	238	242	VWEMF	4	710.309	11.1051	0.015938	0	0	0
ATP-Phe	238	242	VWEMF	4	710.309	11.1271	0.017275	10	-0.008179	0.025484
ATP-Phe	238	242	VWEMF	4	710.309	11.1362	0.017302	30	-0.019604	0.01831
ATP-Phe	238	242	VWEMF	4	710.309	11.1265	0.022074	95	0.018582	0.020658
ATP-Phe	238	242	VWEMF	4	710.309	11.1693	0.010225	1000	-0.032026	0.025066
ATP-Phe-PPi	238	242	VWEMF	4	710.309	11.1506	0.015302	0	0	0
ATP-Phe-PPi	238	242	VWEMF	4	710.309	11.1684	0.006937	10	0.009394	0.026071
ATP-Phe-PPi	238	242	VWEMF	4	710.309	11.129	0.007446	30	0.01774	0.018848
ATP-Phe-PPi	238	242	VWEMF	4	710.309	11.1412	0.007646	95	0.006527	0.031089
ATP-Phe-PPi	238	242	VWEMF	4	710.309	11.1425	0.020812	1000	-0.013913	0.021079
apo	238	242	VWEMF	4	710.309	11.1328	0.013433	0	0	0
apo	238	242	VWEMF	4	710.309	11.1276	0.021952	10	0.017654	0.015318
apo	238	242	VWEMF	4	710.309	11.12	0.005288	30	0.039804	0.015153
apo	238	242	VWEMF	4	710.309	11.1467	0.015518	95	0.030523	0.025899
apo	238	242	VWEMF	4	710.309	11.1153	0.013589	1000	0.046648	0.01567
ATP-Phe	243	251	MALLTGASL	8	875.478	9.8826	0.003661	0	0	0
ATP-Phe	243	251	MALLTGASL	8	875.478	9.91669	0.00876	10	-0.004346	0.018282
ATP-Phe	243	251	MALLTGASL	8	875.478	9.91178	0.003949	30	-0.021991	0.025426
ATP-Phe	243	251	MALLTGASL	8	875.478	9.91729	0.001988	95	-0.022598	0.012599
ATP-Phe	243	251	MALLTGASL	8	875.478	9.92196	0.00652	1000	-0.031094	0.013774
ATP-Phe-PPi	243	251	MALLTGASL	8	875.478	9.89651	0.002258	0	0	0
ATP-Phe-PPi	243	251	MALLTGASL	8	875.478	9.91822	0.005706	10	-0.019356	0.011528
ATP-Phe-PPi	243	251	MALLTGASL	8	875.478	9.91168	0.0042	30	-0.029168	0.011112
ATP-Phe-PPi	243	251	MALLTGASL	8	875.478	9.90663	0.005168	95	-0.040298	0.010774
ATP-Phe-PPi	243	251	MALLTGASL	8	875.478	9.90273	0.007116	1000	-0.050379	0.011168
apo	243	251	MALLTGASL	8	875.478	9.91641	0.007694	0	0	0
apo	243	251	MALLTGASL	8	875.478	9.92786	0.003238	10	0.056628	0.012187
apo	243	251	MALLTGASL	8	875.478	9.93004	0.003096	30	0.042011	0.015416
apo	243	251	MALLTGASL	8	875.478	9.92825	0.001786	95	0.047659	0.014091
apo	243	251	MALLTGASL	8	875.478	9.92969	0.004403	1000	0.053976	0.010051
ATP-Phe	244	251	ALLTGASL	7	744.438	9.29214	0.003865	0	0	0
ATP-Phe	244	251	ALLTGASL	7	744.438	9.34327	0.010696	10	0.127586	0.02218
ATP-Phe	244	251	ALLTGASL	7	744.438	9.34458	0.000696	30	0.107835	0.042259
ATP-Phe	244	251	ALLTGASL	7	744.438	9.35137	0.001115	95	0.132266	0.03158
ATP-Phe	244	251	ALLTGASL	7	744.438	9.35594	0.003297	1000	0.103162	0.017448
ATP-Phe-PPi	244	251	ALLTGASL	7	744.438	9.30402	0.002798	0	0	0
ATP-Phe-PPi	244	251	ALLTGASL	7	744.438	9.3416	0.005335	10	0.1482	0.031049
ATP-Phe-PPi	244	251	ALLTGASL	7	744.438	9.34561	0.004682	30	0.159884	0.02983
ATP-Phe-PPi	244	251	ALLTGASL	7	744.438	9.3464	0.001829	95	0.123906	0.017662
ATP-Phe-PPi	244	251	ALLTGASL	7	744.438	9.33389	0.01005	1000	0.113973	0.057446
apo	244	251	ALLTGASL	7	744.438	9.31669	0.005577	0	0	0
apo	244	251	ALLTGASL	7	744.438	9.34943	0.004496	10	0.141772	0.01413
apo	244	251	ALLTGASL	7	744.438	9.35048	0.002417	30	0.152471	0.037508
apo	244	251	ALLTGASL	7	744.438	9.35092	0.001845	95	0.096878	0.07916
apo	244	251	ALLTGASL	7	744.438	9.35562	0.003436	1000	0.122708	0.034785
ATP-Phe	252	255	YIIL	3	520.326	10.2485	0.002986	0	0	0
ATP-Phe	252	255	YIIL	3	520.326	10.3012	0.011083	10	0.014495	0.012841
ATP-Phe	252	255	YIIL	3	520.326	10.2961	0.004815	30	0.005048	0.013297
ATP-Phe	252	255	YIIL	3	520.326	10.304	0.003449	95	0.019927	0.012251
ATP-Phe	252	255	YIIL	3	520.326	10.3107	0.007925	1000	0.12115	0.027464
ATP-Phe-PPi	252	255	YIIL	3	520.326	10.264	0.00333	0	0	0
ATP-Phe-PPi	252	255	YIIL	3	520.326	10.3012	0.005239	10	0.001946	0.011089
ATP-Phe-PPi	252	255	YIIL	3	520.326	10.2937	0.004469	30	0.023028	0.010942
ATP-Phe-PPi	252	255	YIIL	3	520.326	10.2894	0.005329	95	0.02463	0.01333
ATP-Phe-PPi	252	255	YIIL	3	520.326	10.2865	0.008084	1000	0.160732	0.027459
apo	252	255	YIIL	3	520.326	10.2847	0.00741	0	0	0
apo	252	255	YIIL	3	520.326	10.3128	0.003572	10	0.004873	0.023719
apo	252	255	YIIL	3	520.326	10.3168	0.00306	30	0.009336	0.017734
apo	252	255	YIIL	3	520.326	10.3113	0.004205	95	0.025495	0.021333
apo	252	255	YIIL	3	520.326	10.3125	0.004791	1000	0.195773	0.019503
ATP-Phe	253	261	IILKDTIND	8	1043.59	7.94762	0.003211	0	0	0
ATP-Phe	253	261	IILKDTIND	8	1043.59	8.00016	0.009263	10	0.867102	0.01991
ATP-Phe	253	261	IILKDTIND	8	1043.59	8.00893	0.009092	30	0.978579	0.017984
ATP-Phe	253	261	IILKDTIND	8	1043.59	8.01485	0.005379	95	1.08042	0.022335
ATP-Phe	253	261	IILKDTIND	8	1043.59	8.02391	0.002066	1000	1.58622	0.059613
ATP-Phe-PPi	253	261	IILKDTIND	8	1043.59	7.95469	0.003388	0	0	0
ATP-Phe-PPi	253	261	IILKDTIND	8	1043.59	7.99281	0.002077	10	0.883872	0.024041
ATP-Phe-PPi	253	261	IILKDTIND	8	1043.59	8.00912	0.012301	30	0.987463	0.01961
ATP-Phe-PPi	253	261	IILKDTIND	8	1043.59	8.01824	0.00866	95	1.06196	0.013952
ATP-Phe-PPi	253	261	IILKDTIND	8	1043.59	8.01434	0.009316	1000	1.69853	0.037774
apo	253	261	IILKDTIND	8	1043.59	7.94658	0.002201	0	0	0
apo	253	261	IILKDTIND	8	1043.59	7.99099	0.002573	10	0.961825	0.029933
apo	253	261	IILKDTIND	8	1043.59	7.98585	0.003863	30	1.07917	0.02111
apo	253	261	IILKDTIND	8	1043.59	7.99179	0.000943	95	1.24061	0.032282
apo	253	261	IILKDTIND	8	1043.59	7.99942	0.00347	1000	2.14105	0.048384
ATP-Phe	262	267	FVKFEQ	5	796.411	7.90141	0.004175	0	0	0
ATP-Phe	262	267	FVKFEQ	5	796.411	7.95661	0.005893	10	0.032803	0.014769
ATP-Phe	262	267	FVKFEQ	5	796.411	7.96776	0.012488	30	0.010996	0.015183
ATP-Phe	262	267	FVKFEQ	5	796.411	7.97298	0.008592	95	0.009646	0.013631
ATP-Phe	262	267	FVKFEQ	5	796.411	7.98899	0.003583	1000	0.007608	0.016789
ATP-Phe-PPi	262	267	FVKFEQ	5	796.411	7.90767	0.004602	0	0	0
ATP-Phe-PPi	262	267	FVKFEQ	5	796.411	7.94697	0.002935	10	0.004763	0.01608
ATP-Phe-PPi	262	267	FVKFEQ	5	796.411	7.96018	0.009547	30	0.002017	0.022219
ATP-Phe-PPi	262	267	FVKFEQ	5	796.411	7.9763	0.010753	95	-0.009741	0.018296
ATP-Phe-PPi	262	267	FVKFEQ	5	796.411	7.97778	0.013281	1000	-0.035087	0.016996
apo	262	267	FVKFEQ	5	796.411	7.8983	0.003307	0	0	0
apo	262	267	FVKFEQ	5	796.411	7.9466	0.006432	10	0.00235	0.025366
apo	262	267	FVKFEQ	5	796.411	7.94385	0.003506	30	0.00598	0.025573
apo	262	267	FVKFEQ	5	796.411	7.94811	0.001808	95	0.016765	0.028941
apo	262	267	FVKFEQ	5	796.411	7.95759	0.002866	1000	0.016655	0.026749
ATP-Phe	263	267	VKFEQ	4	649.343	6.8427	0.005457	0	0	0
ATP-Phe	263	267	VKFEQ	4	649.343	6.90612	0.005726	10	0.010581	0.002287
ATP-Phe	263	267	VKFEQ	4	649.343	6.91615	0.009079	30	0.009747	0.002587
ATP-Phe	263	267	VKFEQ	4	649.343	6.91643	0.006925	95	0.010187	0.003399
ATP-Phe	263	267	VKFEQ	4	649.343	6.92328	0.005343	1000	0.036562	0.012436
ATP-Phe-PPi	263	267	VKFEQ	4	649.343	6.84062	0.004462	0	0	0
ATP-Phe-PPi	263	267	VKFEQ	4	649.343	6.89051	0.005052	10	0.021995	0.008877
ATP-Phe-PPi	263	267	VKFEQ	4	649.343	6.90575	0.009848	30	0.026572	0.008649
ATP-Phe-PPi	263	267	VKFEQ	4	649.343	6.91974	0.012021	95	0.032676	0.018067
ATP-Phe-PPi	263	267	VKFEQ	4	649.343	6.92206	0.01332	1000	0.014961	0.012617
apo	263	267	VKFEQ	4	649.343	6.83603	0.003811	0	0	0
apo	263	267	VKFEQ	4	649.343	6.89624	0.004746	10	0.045698	0.015072
apo	263	267	VKFEQ	4	649.343	6.88996	0.004038	30	0.038022	0.015772
apo	263	267	VKFEQ	4	649.343	6.89813	0.000802	95	0.03023	0.015007
apo	263	267	VKFEQ	4	649.343	6.90592	0.00188	1000	0.031296	0.01074
ATP-Phe	264	267	KFEQ	3	550.275	7.89571	0.002799	0	0	0
ATP-Phe	264	267	KFEQ	3	550.275	7.95197	0.005858	10	0.026414	0.008129
ATP-Phe	264	267	KFEQ	3	550.275	7.96195	0.01136	30	0.027845	0.009805
ATP-Phe	264	267	KFEQ	3	550.275	7.96338	0.006626	95	0.030917	0.007739
ATP-Phe	264	267	KFEQ	3	550.275	7.9776	0.00609	1000	0.019752	0.009456
ATP-Phe-PPi	264	267	KFEQ	3	550.275	7.9012	0.003349	0	0	0
ATP-Phe-PPi	264	267	KFEQ	3	550.275	7.94356	0.002196	10	0.000916	0.032864
ATP-Phe-PPi	264	267	KFEQ	3	550.275	7.9524	0.008018	30	0.020461	0.013774
ATP-Phe-PPi	264	267	KFEQ	3	550.275	7.96744	0.010557	95	0.01239	0.010574
ATP-Phe-PPi	264	267	KFEQ	3	550.275	7.9707	0.012781	1000	0.016857	0.010925
apo	264	267	KFEQ	3	550.275	7.89194	0.004837	0	0	0
apo	264	267	KFEQ	3	550.275	7.94139	0.004178	10	0.01888	0.009243
apo	264	267	KFEQ	3	550.275	7.93814	0.002498	30	0.015038	0.005436
apo	264	267	KFEQ	3	550.275	7.94365	0.000217	95	0.006377	0.004358
apo	264	267	KFEQ	3	550.275	7.95254	0.002662	1000	0.030359	0.002474
ATP-Phe	266	273	EQYINQKE	7	1050.5	6.68102	0.003516	0	0	0
ATP-Phe	266	273	EQYINQKE	7	1050.5	6.7352	0.005261	10	0.068298	0.009489
ATP-Phe	266	273	EQYINQKE	7	1050.5	6.74215	0.006002	30	0.050788	0.029032
ATP-Phe	266	273	EQYINQKE	7	1050.5	6.73876	0.004507	95	0.058795	0.025117
ATP-Phe	266	273	EQYINQKE	7	1050.5	6.7421	0.003738	1000	0.070861	0.01824
ATP-Phe-PPi	266	273	EQYINQKE	7	1050.5	6.68017	0.004917	0	0	0
ATP-Phe-PPi	266	273	EQYINQKE	7	1050.5	6.72329	0.002568	10	0.058862	0.023386
ATP-Phe-PPi	266	273	EQYINQKE	7	1050.5	6.73681	0.00797	30	0.065486	0.02831
ATP-Phe-PPi	266	273	EQYINQKE	7	1050.5	6.74443	0.009773	95	0.065893	0.018983
ATP-Phe-PPi	266	273	EQYINQKE	7	1050.5	6.74393	0.009363	1000	0.052453	0.018046
apo	266	273	EQYINQKE	7	1050.5	6.67116	0.002291	0	0	0
apo	266	273	EQYINQKE	7	1050.5	6.72652	0.003325	10	0.067625	0.057873
apo	266	273	EQYINQKE	7	1050.5	6.71923	0.003239	30	0.047451	0.040231
apo	266	273	EQYINQKE	7	1050.5	6.72619	0.0007	95	0.075368	0.041018
apo	266	273	EQYINQKE	7	1050.5	6.73278	0.000963	1000	0.073235	0.051391
ATP-Phe	266	276	EQYINQKEITV	10	1363.7	8.24425	0.004442	0	0	0
ATP-Phe	266	276	EQYINQKEITV	10	1363.7	8.29294	0.007141	10	0.026459	0.021021
ATP-Phe	266	276	EQYINQKEITV	10	1363.7	8.29831	0.004895	30	0.035143	0.032206
ATP-Phe	266	276	EQYINQKEITV	10	1363.7	8.30312	0.002337	95	0.032638	0.032189
ATP-Phe	266	276	EQYINQKEITV	10	1363.7	8.30987	0.001729	1000	0.046913	0.012784
ATP-Phe-PPi	266	276	EQYINQKEITV	10	1363.7	8.25293	0.002872	0	0	0
ATP-Phe-PPi	266	276	EQYINQKEITV	10	1363.7	8.28902	0.003489	10	0.031961	0.029942
ATP-Phe-PPi	266	276	EQYINQKEITV	10	1363.7	8.29731	0.006573	30	0.051506	0.027809
ATP-Phe-PPi	266	276	EQYINQKEITV	10	1363.7	8.30316	0.003808	95	0.052188	0.034699
ATP-Phe-PPi	266	276	EQYINQKEITV	10	1363.7	8.29984	0.0053	1000	0.034111	0.027477
apo	266	276	EQYINQKEITV	10	1363.7	8.24826	0.003081	0	0	0
apo	266	276	EQYINQKEITV	10	1363.7	8.29092	0.00376	10	0.102656	0.065476
apo	266	276	EQYINQKEITV	10	1363.7	8.28558	0.003292	30	0.07815	0.058303
apo	266	276	EQYINQKEITV	10	1363.7	8.29206	0.001947	95	0.096209	0.050282
apo	266	276	EQYINQKEITV	10	1363.7	8.29871	0.004261	1000	0.125323	0.04871
ATP-Phe	268	273	YINQKE	5	793.397	5.862	0.022617	0	0	0
ATP-Phe	268	273	YINQKE	5	793.397	5.94393	0.035117	10	0.062041	0.021271
ATP-Phe	268	273	YINQKE	5	793.397	5.9497	0.013204	30	0.046819	0.014734
ATP-Phe	268	273	YINQKE	5	793.397	5.96042	0.015875	95	0.050147	0.012963
ATP-Phe	268	273	YINQKE	5	793.397	5.95465	0.006542	1000	0.048966	0.012198
ATP-Phe-PPi	268	273	YINQKE	5	793.397	5.82412	0.054654	0	0	0
ATP-Phe-PPi	268	273	YINQKE	5	793.397	5.86216	0.031863	10	0.018728	0.016384
ATP-Phe-PPi	268	273	YINQKE	5	793.397	5.89497	0.023962	30	0.033478	0.010422
ATP-Phe-PPi	268	273	YINQKE	5	793.397	5.91936	0.031654	95	0.02378	0.012835
ATP-Phe-PPi	268	273	YINQKE	5	793.397	5.94953	0.078917	1000	0.021718	0.011303
apo	268	273	YINQKE	5	793.397	5.87655	0.070489	0	0	0
apo	268	273	YINQKE	5	793.397	5.95615	0.032343	10	0.053798	0.023506
apo	268	273	YINQKE	5	793.397	5.92389	0.053108	30	0.037407	0.023878
apo	268	273	YINQKE	5	793.397	5.96485	0.016055	95	0.057809	0.011857
apo	268	273	YINQKE	5	793.397	5.96234	0.015519	1000	0.065927	0.036357
ATP-Phe	276	283	VITLPPTY	5	902.511	8.95141	0.003589	0	0	0
ATP-Phe	276	283	VITLPPTY	5	902.511	8.98764	0.008281	10	0.149481	0.013132
ATP-Phe	276	283	VITLPPTY	5	902.511	8.98763	0.001153	30	0.165933	0.015867
ATP-Phe	276	283	VITLPPTY	5	902.511	8.9945	0.000718	95	0.182775	0.021338
ATP-Phe	276	283	VITLPPTY	5	902.511	9.00322	0.003912	1000	0.308558	0.01492
ATP-Phe-PPi	276	283	VITLPPTY	5	902.511	8.95705	0.00319	0	0	0
ATP-Phe-PPi	276	283	VITLPPTY	5	902.511	8.98181	0.001907	10	0.153167	0.009608
ATP-Phe-PPi	276	283	VITLPPTY	5	902.511	8.98718	0.00638	30	0.173695	0.010332
ATP-Phe-PPi	276	283	VITLPPTY	5	902.511	8.99199	0.0017	95	0.192137	0.020654
ATP-Phe-PPi	276	283	VITLPPTY	5	902.511	8.98767	0.006645	1000	0.301268	0.018444
apo	276	283	VITLPPTY	5	902.511	8.96428	0.003606	0	0	0
apo	276	283	VITLPPTY	5	902.511	8.98809	0.003255	10	0.188558	0.029561
apo	276	283	VITLPPTY	5	902.511	8.98226	0.001666	30	0.21107	0.02093
apo	276	283	VITLPPTY	5	902.511	8.99014	0.002278	95	0.247396	0.015316
apo	276	283	VITLPPTY	5	902.511	8.99498	0.004956	1000	0.590153	0.015019
ATP-Phe	277	283	ITLPPTY	4	803.442	8.67755	0.003095	0	0	0
ATP-Phe	277	283	ITLPPTY	4	803.442	8.72691	0.006369	10	0.37978	0.020322
ATP-Phe	277	283	ITLPPTY	4	803.442	8.72762	0.001808	30	0.429752	0.016783
ATP-Phe	277	283	ITLPPTY	4	803.442	8.73336	0.001407	95	0.469377	0.020412
ATP-Phe	277	283	ITLPPTY	4	803.442	8.73763	0.000723	1000	0.600176	0.049972
ATP-Phe-PPi	277	283	ITLPPTY	4	803.442	8.68808	0.003984	0	0	0
ATP-Phe-PPi	277	283	ITLPPTY	4	803.442	8.7227	0.001433	10	0.404692	0.037074
ATP-Phe-PPi	277	283	ITLPPTY	4	803.442	8.72775	0.005832	30	0.451416	0.034645
ATP-Phe-PPi	277	283	ITLPPTY	4	803.442	8.7314	0.002964	95	0.464556	0.037472
ATP-Phe-PPi	277	283	ITLPPTY	4	803.442	8.72826	0.004504	1000	0.594112	0.046652
apo	277	283	ITLPPTY	4	803.442	8.69191	0.004482	0	0	0
apo	277	283	ITLPPTY	4	803.442	8.72737	0.003691	10	0.575573	0.005281
apo	277	283	ITLPPTY	4	803.442	8.72309	0.001449	30	0.599427	0.005737
apo	277	283	ITLPPTY	4	803.442	8.72812	0.001852	95	0.663728	0.01035
apo	277	283	ITLPPTY	4	803.442	8.73258	0.002431	1000	1.0687	0.029112
ATP-Phe	284	294	VVHLDPERILS	9	1276.71	8.6255	0.001488	0	0	0
ATP-Phe	284	294	VVHLDPERILS	9	1276.71	8.69214	0.007811	10	0.183286	0.01482
ATP-Phe	284	294	VVHLDPERILS	9	1276.71	8.69172	0.002322	30	0.285383	0.014059
ATP-Phe	284	294	VVHLDPERILS	9	1276.71	8.69657	0.002199	95	0.694091	0.036727
ATP-Phe	284	294	VVHLDPERILS	9	1276.71	8.69781	0.001624	1000	2.11141	0.071419
ATP-Phe-PPi	284	294	VVHLDPERILS	9	1276.71	8.63504	0.003751	0	0	0
ATP-Phe-PPi	284	294	VVHLDPERILS	9	1276.71	8.68804	0.002919	10	0.236291	0.019347
ATP-Phe-PPi	284	294	VVHLDPERILS	9	1276.71	8.69129	0.006745	30	0.377453	0.008593
ATP-Phe-PPi	284	294	VVHLDPERILS	9	1276.71	8.69252	0.003402	95	0.811473	0.031767
ATP-Phe-PPi	284	294	VVHLDPERILS	9	1276.71	8.68491	0.007151	1000	2.31072	0.059955
apo	284	294	VVHLDPERILS	9	1276.71	8.64149	0.004041	0	0	0
apo	284	294	VVHLDPERILS	9	1276.71	8.69187	0.004077	10	0.234771	0.020765
apo	284	294	VVHLDPERILS	9	1276.71	8.68806	0.002899	30	0.359204	0.035649
apo	284	294	VVHLDPERILS	9	1276.71	8.6882	0.000762	95	0.859073	0.021568
apo	284	294	VVHLDPERILS	9	1276.71	8.68836	0.002897	1000	2.37961	0.049256
ATP-Phe	284	296	VVHLDPERILSIQ	11	1517.86	9.1991	0.002853	0	0	0
ATP-Phe	284	296	VVHLDPERILSIQ	11	1517.86	9.2462	0.008872	10	0.276188	0.029399
ATP-Phe	284	296	VVHLDPERILSIQ	11	1517.86	9.24332	0.001966	30	0.400808	0.029045
ATP-Phe	284	296	VVHLDPERILSIQ	11	1517.86	9.24698	0.00343	95	0.815177	0.035913
ATP-Phe	284	296	VVHLDPERILSIQ	11	1517.86	9.24702	0.004343	1000	2.45364	0.097725
ATP-Phe-PPi	284	296	VVHLDPERILSIQ	11	1517.86	9.20878	0.003877	0	0	0
ATP-Phe-PPi	284	296	VVHLDPERILSIQ	11	1517.86	9.24479	0.005037	10	0.266773	0.017931
ATP-Phe-PPi	284	296	VVHLDPERILSIQ	11	1517.86	9.24424	0.004612	30	0.436158	0.020206
ATP-Phe-PPi	284	296	VVHLDPERILSIQ	11	1517.86	9.24243	0.001843	95	0.880995	0.018145
ATP-Phe-PPi	284	296	VVHLDPERILSIQ	11	1517.86	9.22925	0.004811	1000	2.56357	0.053371
apo	284	296	VVHLDPERILSIQ	11	1517.86	9.228	0.003521	0	0	0
apo	284	296	VVHLDPERILSIQ	11	1517.86	9.25356	0.005322	10	0.344373	0.01394
apo	284	296	VVHLDPERILSIQ	11	1517.86	9.25274	0.002271	30	0.502615	0.044463
apo	284	296	VVHLDPERILSIQ	11	1517.86	9.24876	0.002021	95	1.0229	0.018226
apo	284	296	VVHLDPERILSIQ	11	1517.86	9.24845	0.004786	1000	2.76825	0.0102
ATP-Phe	284	297	VVHLDPERILSIQT	12	1618.9	9.18298	0.002134	0	0	0
ATP-Phe	284	297	VVHLDPERILSIQT	12	1618.9	9.23109	0.009804	10	0.266809	0.02021
ATP-Phe	284	297	VVHLDPERILSIQT	12	1618.9	9.22791	0.001166	30	0.370889	0.040525
ATP-Phe	284	297	VVHLDPERILSIQT	12	1618.9	9.23284	0.002013	95	0.781267	0.039195
ATP-Phe	284	297	VVHLDPERILSIQT	12	1618.9	9.23248	0.004018	1000	2.39021	0.081961
ATP-Phe-PPi	284	297	VVHLDPERILSIQT	12	1618.9	9.19489	0.005085	0	0	0
ATP-Phe-PPi	284	297	VVHLDPERILSIQT	12	1618.9	9.23059	0.003825	10	0.279128	0.021728
ATP-Phe-PPi	284	297	VVHLDPERILSIQT	12	1618.9	9.22895	0.005152	30	0.427975	0.021769
ATP-Phe-PPi	284	297	VVHLDPERILSIQT	12	1618.9	9.22682	0.001631	95	0.866277	0.027614
ATP-Phe-PPi	284	297	VVHLDPERILSIQT	12	1618.9	9.21229	0.005192	1000	2.55322	0.068171
apo	284	297	VVHLDPERILSIQT	12	1618.9	9.21178	0.00362	0	0	0
apo	284	297	VVHLDPERILSIQT	12	1618.9	9.23796	0.004302	10	0.334295	0.022934
apo	284	297	VVHLDPERILSIQT	12	1618.9	9.23781	0.002601	30	0.479257	0.042898
apo	284	297	VVHLDPERILSIQT	12	1618.9	9.23446	0.002116	95	1.03562	0.032256
apo	284	297	VVHLDPERILSIQT	12	1618.9	9.2342	0.005064	1000	2.75342	0.042717
ATP-Phe	284	298	VVHLDPERILSIQTL	13	1731.99	9.73723	0.004118	0	0	0
ATP-Phe	284	298	VVHLDPERILSIQTL	13	1731.99	9.79104	0.011171	10	0.222559	0.025271
ATP-Phe	284	298	VVHLDPERILSIQTL	13	1731.99	9.77886	0.005988	30	0.321	0.032515
ATP-Phe	284	298	VVHLDPERILSIQTL	13	1731.99	9.78476	0.005563	95	0.721158	0.036115
ATP-Phe	284	298	VVHLDPERILSIQTL	13	1731.99	9.78569	0.009157	1000	2.31829	0.097665
ATP-Phe-PPi	284	298	VVHLDPERILSIQTL	13	1731.99	9.75266	0.002207	0	0	0
ATP-Phe-PPi	284	298	VVHLDPERILSIQTL	13	1731.99	9.78907	0.006988	10	0.239157	0.017128
ATP-Phe-PPi	284	298	VVHLDPERILSIQTL	13	1731.99	9.77831	0.003994	30	0.401334	0.01714
ATP-Phe-PPi	284	298	VVHLDPERILSIQTL	13	1731.99	9.76955	0.007537	95	0.826147	0.026368
ATP-Phe-PPi	284	298	VVHLDPERILSIQTL	13	1731.99	9.75899	0.007359	1000	2.49479	0.045647
apo	284	298	VVHLDPERILSIQTL	13	1731.99	9.77898	0.006475	0	0	0
apo	284	298	VVHLDPERILSIQTL	13	1731.99	9.80287	0.005521	10	0.327939	0.045998
apo	284	298	VVHLDPERILSIQTL	13	1731.99	9.8076	0.004114	30	0.479761	0.045268
apo	284	298	VVHLDPERILSIQTL	13	1731.99	9.8002	0.003374	95	1.0222	0.027496
apo	284	298	VVHLDPERILSIQTL	13	1731.99	9.79245	0.004894	1000	2.73418	0.029243
ATP-Phe	298	309	LITAGSATSPSL	10	1116.6	8.45465	0.001646	0	0	0
ATP-Phe	298	309	LITAGSATSPSL	10	1116.6	8.49387	0.006744	10	1.60265	0.276783
ATP-Phe	298	309	LITAGSATSPSL	10	1116.6	8.4955	0.001757	30	1.60485	0.037922
ATP-Phe	298	309	LITAGSATSPSL	10	1116.6	8.49993	0.002847	95	1.92719	0.04861
ATP-Phe	298	309	LITAGSATSPSL	10	1116.6	8.50767	0.00171	1000	3.11239	0.069362
ATP-Phe-PPi	298	309	LITAGSATSPSL	10	1116.6	8.46131	0.004075	0	0	0
ATP-Phe-PPi	298	309	LITAGSATSPSL	10	1116.6	8.48753	0.001719	10	2.15764	0.051659
ATP-Phe-PPi	298	309	LITAGSATSPSL	10	1116.6	8.49564	0.005333	30	2.42973	0.035139
ATP-Phe-PPi	298	309	LITAGSATSPSL	10	1116.6	8.4994	0.005225	95	3.08813	0.04139
ATP-Phe-PPi	298	309	LITAGSATSPSL	10	1116.6	8.4927	0.006303	1000	4.25267	0.043415
apo	298	309	LITAGSATSPSL	10	1116.6	8.46261	0.003984	0	0	0
apo	298	309	LITAGSATSPSL	10	1116.6	8.48813	0.003913	10	3.42841	0.041405
apo	298	309	LITAGSATSPSL	10	1116.6	8.48216	0.003471	30	3.8624	0.017402
apo	298	309	LITAGSATSPSL	10	1116.6	8.48904	0.002699	95	4.32744	0.034992
apo	298	309	LITAGSATSPSL	10	1116.6	8.49395	0.001462	1000	4.86559	0.073351
ATP-Phe	298	322	LITAGSATSPSLVNKWKEKVTYINA	23	2690.46	8.64447	0.002246	0	0	0
ATP-Phe	298	322	LITAGSATSPSLVNKWKEKVTYINA	23	2690.46	8.703	0.005148	10	1.788	0.032015
ATP-Phe	298	322	LITAGSATSPSLVNKWKEKVTYINA	23	2690.46	8.70032	0.001906	30	2.06573	0.035859
ATP-Phe	298	322	LITAGSATSPSLVNKWKEKVTYINA	23	2690.46	8.70542	0.002398	95	2.65867	0.06131
ATP-Phe	298	322	LITAGSATSPSLVNKWKEKVTYINA	23	2690.46	8.71	0.001337	1000	4.4252	0.160748
ATP-Phe-PPi	298	322	LITAGSATSPSLVNKWKEKVTYINA	23	2690.46	8.6509	0.003064	0	0	0
ATP-Phe-PPi	298	322	LITAGSATSPSLVNKWKEKVTYINA	23	2690.46	8.69824	0.004244	10	2.47521	0.040241
ATP-Phe-PPi	298	322	LITAGSATSPSLVNKWKEKVTYINA	23	2690.46	8.69896	0.004638	30	2.8799	0.043978
ATP-Phe-PPi	298	322	LITAGSATSPSLVNKWKEKVTYINA	23	2690.46	8.70112	0.001987	95	3.70762	0.060277
ATP-Phe-PPi	298	322	LITAGSATSPSLVNKWKEKVTYINA	23	2690.46	8.69602	0.004199	1000	5.78925	0.098122
apo	298	322	LITAGSATSPSLVNKWKEKVTYINA	23	2690.46	8.65403	0.0024	0	0	0
apo	298	322	LITAGSATSPSLVNKWKEKVTYINA	23	2690.46	8.7	0.003843	10	3.653	0.079402
apo	298	322	LITAGSATSPSLVNKWKEKVTYINA	23	2690.46	8.69654	0.001462	30	4.29778	0.041563
apo	298	322	LITAGSATSPSLVNKWKEKVTYINA	23	2690.46	8.69668	0.004503	95	5.11893	0.114907
apo	298	322	LITAGSATSPSLVNKWKEKVTYINA	23	2690.46	8.69937	0.003266	1000	7.03909	0.024867
ATP-Phe	299	309	ITAGSATSPSL	9	1003.52	7.96872	0.004794	0	0	0
ATP-Phe	299	309	ITAGSATSPSL	9	1003.52	8.0169	0.006629	10	1.30472	0.044869
ATP-Phe	299	309	ITAGSATSPSL	9	1003.52	8.02403	0.004809	30	1.48713	0.04815
ATP-Phe	299	309	ITAGSATSPSL	9	1003.52	8.02705	0.00292	95	1.8614	0.055072
ATP-Phe	299	309	ITAGSATSPSL	9	1003.52	8.03314	0.002255	1000	3.00583	0.116878
ATP-Phe-PPi	299	309	ITAGSATSPSL	9	1003.52	7.97548	0.003105	0	0	0
ATP-Phe-PPi	299	309	ITAGSATSPSL	9	1003.52	8.00233	0.005029	10	2.12041	0.064805
ATP-Phe-PPi	299	309	ITAGSATSPSL	9	1003.52	8.01793	0.013145	30	2.4076	0.058666
ATP-Phe-PPi	299	309	ITAGSATSPSL	9	1003.52	8.03073	0.005177	95	2.93147	0.063111
ATP-Phe-PPi	299	309	ITAGSATSPSL	9	1003.52	8.02604	0.003909	1000	4.36343	0.067454
apo	299	309	ITAGSATSPSL	9	1003.52	7.96734	0.002432	0	0	0
apo	299	309	ITAGSATSPSL	9	1003.52	8.00252	0.006991	10	3.50732	0.044798
apo	299	309	ITAGSATSPSL	9	1003.52	7.99387	0.001964	30	3.89252	0.090875
apo	299	309	ITAGSATSPSL	9	1003.52	8.00347	0.004915	95	4.37568	0.013648
apo	299	309	ITAGSATSPSL	9	1003.52	8.01727	0.004335	1000	4.87659	0.033633
ATP-Phe	310	319	VNKWKEKVTY	9	1293.71	7.15083	0.004226	0	0	0
ATP-Phe	310	319	VNKWKEKVTY	9	1293.71	7.20448	0.003848	10	0.501516	0.055875
ATP-Phe	310	319	VNKWKEKVTY	9	1293.71	7.20536	0.005771	30	0.744869	0.05893
ATP-Phe	310	319	VNKWKEKVTY	9	1293.71	7.2037	0.005734	95	0.937986	0.058547
ATP-Phe	310	319	VNKWKEKVTY	9	1293.71	7.20664	0.005534	1000	1.39448	0.059349
ATP-Phe-PPi	310	319	VNKWKEKVTY	9	1293.71	7.14761	0.005539	0	0	0
ATP-Phe-PPi	310	319	VNKWKEKVTY	9	1293.71	7.19135	0.002463	10	0.523782	0.01847
ATP-Phe-PPi	310	319	VNKWKEKVTY	9	1293.71	7.19715	0.010212	30	0.756247	0.013901
ATP-Phe-PPi	310	319	VNKWKEKVTY	9	1293.71	7.19868	0.009677	95	0.96907	0.052002
ATP-Phe-PPi	310	319	VNKWKEKVTY	9	1293.71	7.19738	0.00772	1000	1.41223	0.034155
apo	310	319	VNKWKEKVTY	9	1293.71	7.13718	0.005084	0	0	0
apo	310	319	VNKWKEKVTY	9	1293.71	7.18766	0.007736	10	0.743237	0.025348
apo	310	319	VNKWKEKVTY	9	1293.71	7.17351	0.006126	30	0.914827	0.053715
apo	310	319	VNKWKEKVTY	9	1293.71	7.18504	0.003886	95	1.16024	0.028188
apo	310	319	VNKWKEKVTY	9	1293.71	7.18901	0.002106	1000	1.75294	0.020602
ATP-Phe	310	322	VNKWKEKVTYINA	12	1591.87	7.55582	0.004366	0	0	0
ATP-Phe	310	322	VNKWKEKVTYINA	12	1591.87	7.61055	0.005364	10	0.578257	0.034209
ATP-Phe	310	322	VNKWKEKVTYINA	12	1591.87	7.61251	0.006947	30	0.722364	0.023429
ATP-Phe	310	322	VNKWKEKVTYINA	12	1591.87	7.61296	0.004409	95	0.935491	0.02839
ATP-Phe	310	322	VNKWKEKVTYINA	12	1591.87	7.61779	0.002112	1000	1.3158	0.039604
ATP-Phe-PPi	310	322	VNKWKEKVTYINA	12	1591.87	7.56082	0.006702	0	0	0
ATP-Phe-PPi	310	322	VNKWKEKVTYINA	12	1591.87	7.604	0.002875	10	0.61421	0.042933
ATP-Phe-PPi	310	322	VNKWKEKVTYINA	12	1591.87	7.61242	0.010031	30	0.784373	0.019642
ATP-Phe-PPi	310	322	VNKWKEKVTYINA	12	1591.87	7.61016	0.008088	95	1.00629	0.019031
ATP-Phe-PPi	310	322	VNKWKEKVTYINA	12	1591.87	7.60914	0.00628	1000	1.44623	0.02695
apo	310	322	VNKWKEKVTYINA	12	1591.87	7.53886	0.002306	0	0	0
apo	310	322	VNKWKEKVTYINA	12	1591.87	7.59096	0.004915	10	0.627964	0.036136
apo	310	322	VNKWKEKVTYINA	12	1591.87	7.58333	0.002447	30	0.77485	0.030832
apo	310	322	VNKWKEKVTYINA	12	1591.87	7.5912	0.00051	95	1.09509	0.049797
apo	310	322	VNKWKEKVTYINA	12	1591.87	7.5996	0.001639	1000	1.9022	0.060783
ATP-Phe	323	327	YGPTE	3	565.238	6.81816	0.003881	0	0	0
ATP-Phe	323	327	YGPTE	3	565.238	6.86658	0.005305	10	0.02681	0.01396
ATP-Phe	323	327	YGPTE	3	565.238	6.87584	0.008311	30	0.019943	0.008448
ATP-Phe	323	327	YGPTE	3	565.238	6.87525	0.006459	95	0.019106	0.010676
ATP-Phe	323	327	YGPTE	3	565.238	6.88363	0.004243	1000	0.009304	0.035054
ATP-Phe-PPi	323	327	YGPTE	3	565.238	6.82019	0.004692	0	0	0
ATP-Phe-PPi	323	327	YGPTE	3	565.238	6.85093	0.004389	10	0.141202	0.018904
ATP-Phe-PPi	323	327	YGPTE	3	565.238	6.86854	0.010226	30	0.220673	0.020831
ATP-Phe-PPi	323	327	YGPTE	3	565.238	6.87931	0.011457	95	0.419778	0.021241
ATP-Phe-PPi	323	327	YGPTE	3	565.238	6.88122	0.013206	1000	0.906095	0.03793
apo	323	327	YGPTE	3	565.238	6.80659	0.0034	0	0	0
apo	323	327	YGPTE	3	565.238	6.84763	0.004356	10	0.933313	0.028434
apo	323	327	YGPTE	3	565.238	6.83914	0.004691	30	1.00268	0.011756
apo	323	327	YGPTE	3	565.238	6.85165	0.001637	95	1.00315	0.016189
apo	323	327	YGPTE	3	565.238	6.85875	0.002591	1000	1.29127	0.013161
ATP-Phe	323	328	YGPTET	4	666.286	6.86477	0.004699	0	0	0
ATP-Phe	323	328	YGPTET	4	666.286	6.91015	0.004838	10	0.046945	0.015618
ATP-Phe	323	328	YGPTET	4	666.286	6.91949	0.008229	30	0.05667	0.016295
ATP-Phe	323	328	YGPTET	4	666.286	6.92087	0.005244	95	0.03988	0.0185
ATP-Phe	323	328	YGPTET	4	666.286	6.92776	0.005499	1000	0.056853	0.017065
ATP-Phe-PPi	323	328	YGPTET	4	666.286	6.86588	0.004313	0	0	0
ATP-Phe-PPi	323	328	YGPTET	4	666.286	6.89681	0.006041	10	0.170492	0.009182
ATP-Phe-PPi	323	328	YGPTET	4	666.286	6.91288	0.010042	30	0.249299	0.018509
ATP-Phe-PPi	323	328	YGPTET	4	666.286	6.92515	0.010929	95	0.463682	0.010042
ATP-Phe-PPi	323	328	YGPTET	4	666.286	6.92774	0.011589	1000	0.972322	0.017563
apo	323	328	YGPTET	4	666.286	6.85294	0.004978	0	0	0
apo	323	328	YGPTET	4	666.286	6.8935	0.0043	10	0.962191	0.023431
apo	323	328	YGPTET	4	666.286	6.88651	0.004744	30	1.0373	0.026926
apo	323	328	YGPTET	4	666.286	6.89698	0.000473	95	1.03804	0.018122
apo	323	328	YGPTET	4	666.286	6.90764	0.00246	1000	1.27323	0.032499
ATP-Phe	323	331	YGPTETTIC	7	983.427	8.43776	0.003434	0	0	0
ATP-Phe	323	331	YGPTETTIC	7	983.427	8.48194	0.005158	10	0.025934	0.023936
ATP-Phe	323	331	YGPTETTIC	7	983.427	8.48658	0.002372	30	0.019391	0.031807
ATP-Phe	323	331	YGPTETTIC	7	983.427	8.4925	0.003145	95	0.020607	0.04431
ATP-Phe	323	331	YGPTETTIC	7	983.427	8.50372	0.001106	1000	0.009028	0.028861
ATP-Phe-PPi	323	331	YGPTETTIC	7	983.427	8.44613	0.003969	0	0	0
ATP-Phe-PPi	323	331	YGPTETTIC	7	983.427	8.47398	0.004167	10	0.134607	0.014673
ATP-Phe-PPi	323	331	YGPTETTIC	7	983.427	8.48562	0.00661	30	0.159352	0.009843
ATP-Phe-PPi	323	331	YGPTETTIC	7	983.427	8.49097	0.006521	95	0.3589	0.017573
ATP-Phe-PPi	323	331	YGPTETTIC	7	983.427	8.49167	0.005807	1000	0.817602	0.018226
apo	323	331	YGPTETTIC	7	983.427	8.44057	0.003838	0	0	0
apo	323	331	YGPTETTIC	7	983.427	8.47094	0.004471	10	0.820954	0.022386
apo	323	331	YGPTETTIC	7	983.427	8.46608	0.003119	30	0.872291	0.025593
apo	323	331	YGPTETTIC	7	983.427	8.47325	0.002086	95	0.911606	0.032588
apo	323	331	YGPTETTIC	7	983.427	8.48326	0.002924	1000	1.36961	0.016578
ATP-Phe	323	332	YGPTETTICA	8	1054.46	8.41998	0.003278	0	0	0
ATP-Phe	323	332	YGPTETTICA	8	1054.46	8.46363	0.00427	10	0.072897	0.00996
ATP-Phe	323	332	YGPTETTICA	8	1054.46	8.46642	0.002153	30	0.056265	0.009035
ATP-Phe	323	332	YGPTETTICA	8	1054.46	8.47217	0.002917	95	0.048844	0.010095
ATP-Phe	323	332	YGPTETTICA	8	1054.46	8.48295	0.000712	1000	0.070518	0.010581
ATP-Phe-PPi	323	332	YGPTETTICA	8	1054.46	8.42625	0.003721	0	0	0
ATP-Phe-PPi	323	332	YGPTETTICA	8	1054.46	8.45527	0.003042	10	0.16227	0.009569
ATP-Phe-PPi	323	332	YGPTETTICA	8	1054.46	8.46533	0.006672	30	0.231233	0.018576
ATP-Phe-PPi	323	332	YGPTETTICA	8	1054.46	8.47079	0.00605	95	0.455194	0.013643
ATP-Phe-PPi	323	332	YGPTETTICA	8	1054.46	8.47092	0.006468	1000	0.927101	0.016036
apo	323	332	YGPTETTICA	8	1054.46	8.42162	0.005411	0	0	0
apo	323	332	YGPTETTICA	8	1054.46	8.45328	0.004142	10	0.890635	0.022311
apo	323	332	YGPTETTICA	8	1054.46	8.44859	0.002788	30	0.984601	0.032009
apo	323	332	YGPTETTICA	8	1054.46	8.45669	0.003105	95	1.0037	0.021427
apo	323	332	YGPTETTICA	8	1054.46	8.46523	0.003016	1000	1.56369	0.026257
ATP-Phe	328	331	TTIC	3	436.199	7.18852	0.004604	0	0	0
ATP-Phe	328	331	TTIC	3	436.199	7.23703	0.004734	10	0.036602	0.019972
ATP-Phe	328	331	TTIC	3	436.199	7.24607	0.006804	30	0.031081	0.020294
ATP-Phe	328	331	TTIC	3	436.199	7.24563	0.006734	95	0.017052	0.018983
ATP-Phe	328	331	TTIC	3	436.199	7.25044	0.00663	1000	0.019986	0.019984
ATP-Phe-PPi	328	331	TTIC	3	436.199	7.18824	0.006124	0	0	0
ATP-Phe-PPi	328	331	TTIC	3	436.199	7.22372	0.005372	10	0.014591	0.015264
ATP-Phe-PPi	328	331	TTIC	3	436.199	7.24112	0.009295	30	0.013584	0.011659
ATP-Phe-PPi	328	331	TTIC	3	436.199	7.25083	0.011874	95	0.023873	0.0213
ATP-Phe-PPi	328	331	TTIC	3	436.199	7.25394	0.012905	1000	0.020096	0.012169
apo	328	331	TTIC	3	436.199	7.17651	0.003919	0	0	0
apo	328	331	TTIC	3	436.199	7.2222	0.004189	10	0.023106	0.01158
apo	328	331	TTIC	3	436.199	7.21267	0.006308	30	0.017293	0.003795
apo	328	331	TTIC	3	436.199	7.22411	0.000939	95	0.053305	0.003412
apo	328	331	TTIC	3	436.199	7.23316	0.003213	1000	0.193578	0.002351
ATP-Phe	328	332	TTICA	4	507.236	7.31971	0.005283	0	0	0
ATP-Phe	328	332	TTICA	4	507.236	7.37557	0.003857	10	-0.010531	0.031977
ATP-Phe	328	332	TTICA	4	507.236	7.38293	0.005417	30	-0.025539	0.026553
ATP-Phe	328	332	TTICA	4	507.236	7.38291	0.004317	95	0.011629	0.006693
ATP-Phe	328	332	TTICA	4	507.236	7.3859	0.004792	1000	0.005921	0.006205
ATP-Phe-PPi	328	332	TTICA	4	507.236	7.32246	0.004678	0	0	0
ATP-Phe-PPi	328	332	TTICA	4	507.236	7.3654	0.004626	10	0.006605	0.034945
ATP-Phe-PPi	328	332	TTICA	4	507.236	7.38008	0.006923	30	0.030012	0.031503
ATP-Phe-PPi	328	332	TTICA	4	507.236	7.38729	0.009128	95	0.023419	0.03183
ATP-Phe-PPi	328	332	TTICA	4	507.236	7.38898	0.008212	1000	0.021862	0.031185
apo	328	332	TTICA	4	507.236	7.31022	0.004104	0	0	0
apo	328	332	TTICA	4	507.236	7.36445	0.004098	10	0.016042	0.023129
apo	328	332	TTICA	4	507.236	7.35424	0.007535	30	-0.031552	0.006085
apo	328	332	TTICA	4	507.236	7.36632	0.001835	95	-0.002807	0.026653
apo	328	332	TTICA	4	507.236	7.37161	0.000265	1000	0.024166	0.002938
ATP-Phe	332	335	ATTW	3	477.222	8.55207	0.004379	0	0	0
ATP-Phe	332	335	ATTW	3	477.222	8.60315	0.009137	10	0.00761	0.023447
ATP-Phe	332	335	ATTW	3	477.222	8.6116	0.004525	30	0.027989	0.016922
ATP-Phe	332	335	ATTW	3	477.222	8.61748	0.002409	95	0.026074	0.015833
ATP-Phe	332	335	ATTW	3	477.222	8.63872	0.006423	1000	0.029112	0.018509
ATP-Phe-PPi	332	335	ATTW	3	477.222	8.59601	0.103618	0	0	0
ATP-Phe-PPi	332	335	ATTW	3	477.222	8.59728	0.004158	10	0.042801	0.01342
ATP-Phe-PPi	332	335	ATTW	3	477.222	8.60834	0.006985	30	0.044042	0.013854
ATP-Phe-PPi	332	335	ATTW	3	477.222	8.62114	0.010296	95	0.043567	0.012966
ATP-Phe-PPi	332	335	ATTW	3	477.222	8.63065	0.016488	1000	0.03222	0.03034
apo	332	335	ATTW	3	477.222	8.55278	0.008103	0	0	0
apo	332	335	ATTW	3	477.222	8.59084	0.006279	10	0.012696	0.029549
apo	332	335	ATTW	3	477.222	8.58687	0.005172	30	0.020097	0.011535
apo	332	335	ATTW	3	477.222	8.59684	0.003551	95	0.038793	0.00672
apo	332	335	ATTW	3	477.222	8.60972	0.005027	1000	0.206154	0.012242
ATP-Phe	335	357	WVATKETIGHSVPIGAPIQNTQI	20	2459.32	8.52594	0.005559	0	0	0
ATP-Phe	335	357	WVATKETIGHSVPIGAPIQNTQI	20	2459.32	8.5726	0.00487	10	4.74945	0.060684
ATP-Phe	335	357	WVATKETIGHSVPIGAPIQNTQI	20	2459.32	8.57153	0.000912	30	5.06999	0.037426
ATP-Phe	335	357	WVATKETIGHSVPIGAPIQNTQI	20	2459.32	8.57775	0.001747	95	5.36236	0.069955
ATP-Phe	335	357	WVATKETIGHSVPIGAPIQNTQI	20	2459.32	8.58552	0.001884	1000	5.87247	0.109175
ATP-Phe-PPi	335	357	WVATKETIGHSVPIGAPIQNTQI	20	2459.32	8.53362	0.001302	0	0	0
ATP-Phe-PPi	335	357	WVATKETIGHSVPIGAPIQNTQI	20	2459.32	8.56718	0.004137	10	4.8176	0.057206
ATP-Phe-PPi	335	357	WVATKETIGHSVPIGAPIQNTQI	20	2459.32	8.56988	0.004578	30	5.17596	0.048934
ATP-Phe-PPi	335	357	WVATKETIGHSVPIGAPIQNTQI	20	2459.32	8.57213	0.003641	95	5.39797	0.041269
ATP-Phe-PPi	335	357	WVATKETIGHSVPIGAPIQNTQI	20	2459.32	8.57245	0.005266	1000	5.97282	0.030049
apo	335	357	WVATKETIGHSVPIGAPIQNTQI	20	2459.32	8.54868	0.007962	0	0	0
apo	335	357	WVATKETIGHSVPIGAPIQNTQI	20	2459.32	8.57124	0.004254	10	5.26589	0.07722
apo	335	357	WVATKETIGHSVPIGAPIQNTQI	20	2459.32	8.56963	0.000927	30	5.57049	0.018384
apo	335	357	WVATKETIGHSVPIGAPIQNTQI	20	2459.32	8.57348	0.002161	95	5.86941	0.031254
apo	335	357	WVATKETIGHSVPIGAPIQNTQI	20	2459.32	8.57729	0.00362	1000	6.95872	0.03073
ATP-Phe	336	357	VATKETIGHSVPIGAPIQNTQI	19	2273.24	8.15919	0.002694	0	0	0
ATP-Phe	336	357	VATKETIGHSVPIGAPIQNTQI	19	2273.24	8.21235	0.006866	10	4.31715	0.069001
ATP-Phe	336	357	VATKETIGHSVPIGAPIQNTQI	19	2273.24	8.21791	0.006862	30	4.6152	0.056362
ATP-Phe	336	357	VATKETIGHSVPIGAPIQNTQI	19	2273.24	8.22107	0.004259	95	4.81406	0.082372
ATP-Phe	336	357	VATKETIGHSVPIGAPIQNTQI	19	2273.24	8.22448	0.000776	1000	5.40071	0.073464
ATP-Phe-PPi	336	357	VATKETIGHSVPIGAPIQNTQI	19	2273.24	8.16839	0.003722	0	0	0
ATP-Phe-PPi	336	357	VATKETIGHSVPIGAPIQNTQI	19	2273.24	8.21089	0.001995	10	4.36016	0.046646
ATP-Phe-PPi	336	357	VATKETIGHSVPIGAPIQNTQI	19	2273.24	8.21608	0.007718	30	4.62436	0.042016
ATP-Phe-PPi	336	357	VATKETIGHSVPIGAPIQNTQI	19	2273.24	8.22177	0.004943	95	4.83955	0.059609
ATP-Phe-PPi	336	357	VATKETIGHSVPIGAPIQNTQI	19	2273.24	8.21429	0.004735	1000	5.4036	0.02595
apo	336	357	VATKETIGHSVPIGAPIQNTQI	19	2273.24	8.16834	0.004995	0	0	0
apo	336	357	VATKETIGHSVPIGAPIQNTQI	19	2273.24	8.20639	0.003798	10	4.71615	0.09103
apo	336	357	VATKETIGHSVPIGAPIQNTQI	19	2273.24	8.20239	0.002437	30	4.99092	0.08909
apo	336	357	VATKETIGHSVPIGAPIQNTQI	19	2273.24	8.20875	0.000769	95	5.3178	0.028212
apo	336	357	VATKETIGHSVPIGAPIQNTQI	19	2273.24	8.21184	0.004303	1000	6.29727	0.059267
ATP-Phe	336	358	VATKETIGHSVPIGAPIQNTQIY	20	2436.3	8.36533	0.003971	0	0	0
ATP-Phe	336	358	VATKETIGHSVPIGAPIQNTQIY	20	2436.3	8.41928	0.006986	10	4.45914	0.10032
ATP-Phe	336	358	VATKETIGHSVPIGAPIQNTQIY	20	2436.3	8.41945	0.003207	30	4.76583	0.004911
ATP-Phe	336	358	VATKETIGHSVPIGAPIQNTQIY	20	2436.3	8.42415	0.001416	95	5.05188	0.03029
ATP-Phe	336	358	VATKETIGHSVPIGAPIQNTQIY	20	2436.3	8.43053	0.003779	1000	5.59128	0.027614
ATP-Phe-PPi	336	358	VATKETIGHSVPIGAPIQNTQIY	20	2436.3	8.36956	0.002336	0	0	0
ATP-Phe-PPi	336	358	VATKETIGHSVPIGAPIQNTQIY	20	2436.3	8.41375	0.001797	10	4.5227	0.103793
ATP-Phe-PPi	336	358	VATKETIGHSVPIGAPIQNTQIY	20	2436.3	8.41864	0.005822	30	4.83767	0.023124
ATP-Phe-PPi	336	358	VATKETIGHSVPIGAPIQNTQIY	20	2436.3	8.42068	0.00376	95	5.0575	0.020883
ATP-Phe-PPi	336	358	VATKETIGHSVPIGAPIQNTQIY	20	2436.3	8.41873	0.006513	1000	5.59847	0.088063
apo	336	358	VATKETIGHSVPIGAPIQNTQIY	20	2436.3	8.37112	0.002664	0	0	0
apo	336	358	VATKETIGHSVPIGAPIQNTQIY	20	2436.3	8.41309	0.002749	10	4.90621	0.059623
apo	336	358	VATKETIGHSVPIGAPIQNTQIY	20	2436.3	8.41049	0.00358	30	5.22357	0.03291
apo	336	358	VATKETIGHSVPIGAPIQNTQIY	20	2436.3	8.4132	0.000873	95	5.49418	0.033421
apo	336	358	VATKETIGHSVPIGAPIQNTQIY	20	2436.3	8.41673	0.002494	1000	6.47348	0.037802
ATP-Phe	339	342	KETI	3	489.279	6.42316	0.004799	0	0	0
ATP-Phe	339	342	KETI	3	489.279	6.47781	0.008322	10	-0.007614	0.011902
ATP-Phe	339	342	KETI	3	489.279	6.48314	0.003698	30	-0.00511	0.007394
ATP-Phe	339	342	KETI	3	489.279	6.47822	0.007939	95	2.1e-05	0.012686
ATP-Phe	339	342	KETI	3	489.279	6.46921	0.006798	1000	0.008911	0.0092
ATP-Phe-PPi	339	342	KETI	3	489.279	6.40938	0.014061	0	0	0
ATP-Phe-PPi	339	342	KETI	3	489.279	6.44802	0.009668	10	-0.008684	0.023456
ATP-Phe-PPi	339	342	KETI	3	489.279	6.46734	0.01266	30	-0.015544	0.019753
ATP-Phe-PPi	339	342	KETI	3	489.279	6.47726	0.0194	95	-0.004006	0.01899
ATP-Phe-PPi	339	342	KETI	3	489.279	6.46924	0.022705	1000	-0.004277	0.019077
apo	339	342	KETI	3	489.279	6.41431	0.009448	0	0	0
apo	339	342	KETI	3	489.279	6.47087	0.007785	10	-0.007019	0.013224
apo	339	342	KETI	3	489.279	6.45165	0.014733	30	-0.001781	0.013041
apo	339	342	KETI	3	489.279	6.4691	0.002725	95	-0.005755	0.019098
apo	339	342	KETI	3	489.279	6.47638	0.00198	1000	-0.002441	0.014262
ATP-Phe	342	354	IGHSVPIGAPIQN	10	1301.71	8.25526	0.003663	0	0	0
ATP-Phe	342	354	IGHSVPIGAPIQN	10	1301.71	8.30648	0.007035	10	0.403747	0.020801
ATP-Phe	342	354	IGHSVPIGAPIQN	10	1301.71	8.31199	0.005186	30	0.434232	0.020926
ATP-Phe	342	354	IGHSVPIGAPIQN	10	1301.71	8.31624	0.002858	95	0.498096	0.036118
ATP-Phe	342	354	IGHSVPIGAPIQN	10	1301.71	8.32106	0.000262	1000	1.14332	0.120891
ATP-Phe-PPi	342	354	IGHSVPIGAPIQN	10	1301.71	8.26475	0.002706	0	0	0
ATP-Phe-PPi	342	354	IGHSVPIGAPIQN	10	1301.71	8.30255	0.003075	10	0.330092	0.0071
ATP-Phe-PPi	342	354	IGHSVPIGAPIQN	10	1301.71	8.30978	0.007691	30	0.397838	0.015478
ATP-Phe-PPi	342	354	IGHSVPIGAPIQN	10	1301.71	8.31553	0.003632	95	0.520526	0.053993
ATP-Phe-PPi	342	354	IGHSVPIGAPIQN	10	1301.71	8.31033	0.004967	1000	1.0347	0.027312
apo	342	354	IGHSVPIGAPIQN	10	1301.71	8.26369	0.003609	0	0	0
apo	342	354	IGHSVPIGAPIQN	10	1301.71	8.30442	0.003668	10	0.269551	0.011681
apo	342	354	IGHSVPIGAPIQN	10	1301.71	8.3002	0.002727	30	0.356593	0.029412
apo	342	354	IGHSVPIGAPIQN	10	1301.71	8.30476	0.001886	95	0.452625	0.023171
apo	342	354	IGHSVPIGAPIQN	10	1301.71	8.31208	0.002895	1000	0.820048	0.014872
ATP-Phe	358	363	YIVDEN	5	751.338	7.51379	0.00651	0	0	0
ATP-Phe	358	363	YIVDEN	5	751.338	7.56089	0.004188	10	0.516741	0.058283
ATP-Phe	358	363	YIVDEN	5	751.338	7.56814	0.00664	30	0.558438	0.05787
ATP-Phe	358	363	YIVDEN	5	751.338	7.57024	0.005477	95	0.658287	0.059509
ATP-Phe	358	363	YIVDEN	5	751.338	7.57715	0.005439	1000	0.956078	0.060414
ATP-Phe-PPi	358	363	YIVDEN	5	751.338	7.52188	0.004558	0	0	0
ATP-Phe-PPi	358	363	YIVDEN	5	751.338	7.55041	0.004396	10	0.497444	0.030265
ATP-Phe-PPi	358	363	YIVDEN	5	751.338	7.56588	0.008194	30	0.537874	0.02071
ATP-Phe-PPi	358	363	YIVDEN	5	751.338	7.57542	0.008623	95	0.644472	0.021244
ATP-Phe-PPi	358	363	YIVDEN	5	751.338	7.57657	0.008997	1000	0.967269	0.022635
apo	358	363	YIVDEN	5	751.338	7.59579	0.12431	0	0	0
apo	358	363	YIVDEN	5	751.338	7.54721	0.002663	10	0.497993	0.015646
apo	358	363	YIVDEN	5	751.338	7.54002	0.003629	30	0.547361	0.017544
apo	358	363	YIVDEN	5	751.338	7.54999	0.000892	95	0.683075	0.018623
apo	358	363	YIVDEN	5	751.338	7.55782	0.001034	1000	1.03617	0.031938
ATP-Phe	358	364	YIVDENL	6	864.422	9.04306	0.004426	0	0	0
ATP-Phe	358	364	YIVDENL	6	864.422	9.08212	0.0081	10	0.490444	0.010817
ATP-Phe	358	364	YIVDENL	6	864.422	9.08031	0.00095	30	0.542376	0.014778
ATP-Phe	358	364	YIVDENL	6	864.422	9.08776	0.000104	95	0.671376	0.017436
ATP-Phe	358	364	YIVDENL	6	864.422	9.09557	0.002324	1000	1.06584	0.025711
ATP-Phe-PPi	358	364	YIVDENL	6	864.422	9.05525	0.002985	0	0	0
ATP-Phe-PPi	358	364	YIVDENL	6	864.422	9.0747	0.00336	10	0.478275	0.019371
ATP-Phe-PPi	358	364	YIVDENL	6	864.422	9.08085	0.00546	30	0.547591	0.008552
ATP-Phe-PPi	358	364	YIVDENL	6	864.422	9.08451	0.002336	95	0.701908	0.019903
ATP-Phe-PPi	358	364	YIVDENL	6	864.422	9.07842	0.005378	1000	1.0681	0.014981
apo	358	364	YIVDENL	6	864.422	9.06022	0.005814	0	0	0
apo	358	364	YIVDENL	6	864.422	9.08004	0.004522	10	0.502537	0.01208
apo	358	364	YIVDENL	6	864.422	9.07742	0.001679	30	0.565028	0.013063
apo	358	364	YIVDENL	6	864.422	9.08079	0.002046	95	0.73852	0.011561
apo	358	364	YIVDENL	6	864.422	9.0883	0.005355	1000	1.17537	0.008084
ATP-Phe	359	362	IVDE	3	474.232	6.27	0.008688	0	0	0
ATP-Phe	359	362	IVDE	3	474.232	6.30849	0.009419	10	0.315193	0.008609
ATP-Phe	359	362	IVDE	3	474.232	6.3168	0.003637	30	0.315378	0.00628
ATP-Phe	359	362	IVDE	3	474.232	6.31371	0.010008	95	0.313481	0.00461
ATP-Phe	359	362	IVDE	3	474.232	6.30493	0.008898	1000	0.321467	0.010775
ATP-Phe-PPi	359	362	IVDE	3	474.232	6.25869	0.02074	0	0	0
ATP-Phe-PPi	359	362	IVDE	3	474.232	6.27673	0.01483	10	0.332473	0.021514
ATP-Phe-PPi	359	362	IVDE	3	474.232	6.29802	0.014131	30	0.333569	0.013564
ATP-Phe-PPi	359	362	IVDE	3	474.232	6.31732	0.023926	95	0.312891	0.019007
ATP-Phe-PPi	359	362	IVDE	3	474.232	6.3205	0.037878	1000	0.330152	0.023823
apo	359	362	IVDE	3	474.232	6.26889	0.014902	0	0	0
apo	359	362	IVDE	3	474.232	6.30546	0.004801	10	0.305402	0.011981
apo	359	362	IVDE	3	474.232	6.28658	0.015265	30	0.309901	0.012091
apo	359	362	IVDE	3	474.232	6.30591	0.001307	95	0.305474	0.00922
apo	359	362	IVDE	3	474.232	6.3157	0.003396	1000	0.357898	0.015071
ATP-Phe	359	363	IVDEN	4	588.275	5.76627	0.022365	0	0	0
ATP-Phe	359	363	IVDEN	4	588.275	5.81556	0.01306	10	0.454236	0.007162
ATP-Phe	359	363	IVDEN	4	588.275	5.83	0.004254	30	0.505036	0.01304
ATP-Phe	359	363	IVDEN	4	588.275	5.82257	0.014665	95	0.5751	0.006957
ATP-Phe	359	363	IVDEN	4	588.275	5.78809	0.013803	1000	0.830583	0.017266
ATP-Phe-PPi	359	363	IVDEN	4	588.275	5.71058	0.062126	0	0	0
ATP-Phe-PPi	359	363	IVDEN	4	588.275	5.74384	0.037044	10	0.462009	0.007718
ATP-Phe-PPi	359	363	IVDEN	4	588.275	5.77393	0.030124	30	0.49755	0.008651
ATP-Phe-PPi	359	363	IVDEN	4	588.275	5.80923	0.045182	95	0.591223	0.007663
ATP-Phe-PPi	359	363	IVDEN	4	588.275	5.80889	0.087607	1000	0.831358	0.019536
apo	359	363	IVDEN	4	588.275	5.74255	0.044226	0	0	0
apo	359	363	IVDEN	4	588.275	5.79364	0.0093	10	0.460803	0.011263
apo	359	363	IVDEN	4	588.275	5.75924	0.039585	30	0.50238	0.009295
apo	359	363	IVDEN	4	588.275	5.794	0.001775	95	0.597536	0.006996
apo	359	363	IVDEN	4	588.275	5.79994	0.008898	1000	0.869265	0.02077
ATP-Phe	363	366	NLQL	3	486.28	8.8796	0.002598	0	0	0
ATP-Phe	363	366	NLQL	3	486.28	8.92608	0.007715	10	0.023102	0.023578
ATP-Phe	363	366	NLQL	3	486.28	8.92778	0.002983	30	0.010571	0.004502
ATP-Phe	363	366	NLQL	3	486.28	8.93425	0.001124	95	0.084293	0.023428
ATP-Phe	363	366	NLQL	3	486.28	8.94457	0.001107	1000	0.457722	0.037967
ATP-Phe-PPi	363	366	NLQL	3	486.28	8.88717	0.002975	0	0	0
ATP-Phe-PPi	363	366	NLQL	3	486.28	8.91942	0.002752	10	0.037873	0.017065
ATP-Phe-PPi	363	366	NLQL	3	486.28	8.92635	0.00584	30	0.070609	0.014146
ATP-Phe-PPi	363	366	NLQL	3	486.28	8.93229	0.002832	95	0.154671	0.009892
ATP-Phe-PPi	363	366	NLQL	3	486.28	8.92958	0.005807	1000	0.533635	0.022588
apo	363	366	NLQL	3	486.28	8.88962	0.00476	0	0	0
apo	363	366	NLQL	3	486.28	8.92146	0.004309	10	0.02814	0.020359
apo	363	366	NLQL	3	486.28	8.91819	0.002183	30	0.052999	0.019054
apo	363	366	NLQL	3	486.28	8.92306	0.001058	95	0.153625	0.01624
apo	363	366	NLQL	3	486.28	8.93029	0.004605	1000	0.644966	0.016369
ATP-Phe	365	375	QLKSVGEAGEL	10	1129.6	7.89893	0.00368	0	0	0
ATP-Phe	365	375	QLKSVGEAGEL	10	1129.6	7.95057	0.00557	10	1.05584	0.035874
ATP-Phe	365	375	QLKSVGEAGEL	10	1129.6	7.96038	0.010266	30	1.41529	0.049141
ATP-Phe	365	375	QLKSVGEAGEL	10	1129.6	7.96153	0.005269	95	1.89012	0.040489
ATP-Phe	365	375	QLKSVGEAGEL	10	1129.6	7.97666	0.005429	1000	2.29238	0.069252
ATP-Phe-PPi	365	375	QLKSVGEAGEL	10	1129.6	7.90399	0.002599	0	0	0
ATP-Phe-PPi	365	375	QLKSVGEAGEL	10	1129.6	7.94282	0.002185	10	1.18544	0.048212
ATP-Phe-PPi	365	375	QLKSVGEAGEL	10	1129.6	7.95405	0.006945	30	1.61784	0.023128
ATP-Phe-PPi	365	375	QLKSVGEAGEL	10	1129.6	7.96692	0.010066	95	1.95313	0.029949
ATP-Phe-PPi	365	375	QLKSVGEAGEL	10	1129.6	7.96879	0.012015	1000	2.38882	0.043709
apo	365	375	QLKSVGEAGEL	10	1129.6	7.89838	0.003571	0	0	0
apo	365	375	QLKSVGEAGEL	10	1129.6	7.94303	0.004218	10	1.36381	0.028125
apo	365	375	QLKSVGEAGEL	10	1129.6	7.93944	0.003445	30	1.77165	0.048774
apo	365	375	QLKSVGEAGEL	10	1129.6	7.94387	0.000992	95	2.15887	0.012078
apo	365	375	QLKSVGEAGEL	10	1129.6	7.95107	0.002354	1000	2.77175	0.029256
ATP-Phe	367	374	KSVGEAGE	7	775.371	5.33845	0.107556	0	0	0
ATP-Phe	367	374	KSVGEAGE	7	775.371	5.36585	0.049954	10	0.958675	0.072944
ATP-Phe	367	374	KSVGEAGE	7	775.371	5.39828	0.08264	30	1.23596	0.072838
ATP-Phe	367	374	KSVGEAGE	7	775.371	5.3737	0.063987	95	1.51199	0.072124
ATP-Phe	367	374	KSVGEAGE	7	775.371	5.46324	0.017106	1000	1.8547	0.086815
ATP-Phe-PPi	367	374	KSVGEAGE	7	775.371	5.05708	0.061676	0	0	0
ATP-Phe-PPi	367	374	KSVGEAGE	7	775.371	5.03678	0.070122	10	1.0321	0.026027
ATP-Phe-PPi	367	374	KSVGEAGE	7	775.371	5.06166	0.032533	30	1.32735	0.018626
ATP-Phe-PPi	367	374	KSVGEAGE	7	775.371	5.14915	0.102886	95	1.52603	0.025369
ATP-Phe-PPi	367	374	KSVGEAGE	7	775.371	5.27655	0.244252	1000	1.91451	0.051458
apo	367	374	KSVGEAGE	7	775.371	5.17557	0.225041	0	0	0
apo	367	374	KSVGEAGE	7	775.371	5.2226	0.083177	10	1.14188	0.052516
apo	367	374	KSVGEAGE	7	775.371	5.08802	0.177852	30	1.40798	0.061459
apo	367	374	KSVGEAGE	7	775.371	5.172	0.012707	95	1.63609	0.055214
apo	367	374	KSVGEAGE	7	775.371	5.15883	0.088375	1000	2.18533	0.05349
ATP-Phe	367	375	KSVGEAGEL	8	888.455	7.34943	0.004133	0	0	0
ATP-Phe	367	375	KSVGEAGEL	8	888.455	7.41501	0.005423	10	0.781268	0.064596
ATP-Phe	367	375	KSVGEAGEL	8	888.455	7.42261	0.007304	30	1.03076	0.057777
ATP-Phe	367	375	KSVGEAGEL	8	888.455	7.42079	0.003858	95	1.32492	0.054895
ATP-Phe	367	375	KSVGEAGEL	8	888.455	7.42636	0.004324	1000	1.64422	0.070635
ATP-Phe-PPi	367	375	KSVGEAGEL	8	888.455	7.35103	0.003445	0	0	0
ATP-Phe-PPi	367	375	KSVGEAGEL	8	888.455	7.40556	0.003257	10	0.860733	0.037153
ATP-Phe-PPi	367	375	KSVGEAGEL	8	888.455	7.41518	0.009064	30	1.15546	0.036745
ATP-Phe-PPi	367	375	KSVGEAGEL	8	888.455	7.42227	0.009474	95	1.35612	0.044694
ATP-Phe-PPi	367	375	KSVGEAGEL	8	888.455	7.42629	0.00917	1000	1.72547	0.055726
apo	367	375	KSVGEAGEL	8	888.455	7.33961	0.003111	0	0	0
apo	367	375	KSVGEAGEL	8	888.455	7.40416	0.003792	10	1.03088	0.022777
apo	367	375	KSVGEAGEL	8	888.455	7.39877	0.00181	30	1.25462	0.050666
apo	367	375	KSVGEAGEL	8	888.455	7.40444	0.001194	95	1.51579	0.014996
apo	367	375	KSVGEAGEL	8	888.455	7.40912	0.001014	1000	2.03199	0.018877
ATP-Phe	376	381	CIGGEG	5	534.21	6.44473	0.005333	0	0	0
ATP-Phe	376	381	CIGGEG	5	534.21	6.48321	0.005953	10	0.096108	0.020114
ATP-Phe	376	381	CIGGEG	5	534.21	6.4911	0.004228	30	0.085835	0.014985
ATP-Phe	376	381	CIGGEG	5	534.21	6.48773	0.006589	95	0.101369	0.011856
ATP-Phe	376	381	CIGGEG	5	534.21	6.48201	0.006683	1000	0.282438	0.027941
ATP-Phe-PPi	376	381	CIGGEG	5	534.21	6.43678	0.013344	0	0	0
ATP-Phe-PPi	376	381	CIGGEG	5	534.21	6.45902	0.009225	10	0.097705	0.015616
ATP-Phe-PPi	376	381	CIGGEG	5	534.21	6.48027	0.011453	30	0.10392	0.022426
ATP-Phe-PPi	376	381	CIGGEG	5	534.21	6.49233	0.018407	95	0.124001	0.013742
ATP-Phe-PPi	376	381	CIGGEG	5	534.21	6.48975	0.026351	1000	0.363727	0.052756
apo	376	381	CIGGEG	5	534.21	6.43024	0.0095	0	0	0
apo	376	381	CIGGEG	5	534.21	6.46783	0.004667	10	0.13066	0.017664
apo	376	381	CIGGEG	5	534.21	6.45265	0.011949	30	0.136001	0.014357
apo	376	381	CIGGEG	5	534.21	6.469	0.002292	95	0.147357	0.0124
apo	376	381	CIGGEG	5	534.21	6.4775	0.001972	1000	0.571336	0.018336
ATP-Phe	376	382	CIGGEGL	6	647.294	8.41215	0.003085	0	0	0
ATP-Phe	376	382	CIGGEGL	6	647.294	8.46095	0.007232	10	0.195579	0.036727
ATP-Phe	376	382	CIGGEGL	6	647.294	8.46494	0.004062	30	0.194897	0.023997
ATP-Phe	376	382	CIGGEGL	6	647.294	8.46929	0.003523	95	0.175716	0.023245
ATP-Phe	376	382	CIGGEGL	6	647.294	8.47948	0.001756	1000	0.359488	0.033369
ATP-Phe-PPi	376	382	CIGGEGL	6	647.294	8.41992	0.003331	0	0	0
ATP-Phe-PPi	376	382	CIGGEGL	6	647.294	8.40515	0.123773	10	0.203701	0.06448
ATP-Phe-PPi	376	382	CIGGEGL	6	647.294	8.46551	0.008162	30	0.241268	0.037789
ATP-Phe-PPi	376	382	CIGGEGL	6	647.294	8.4231	0.125615	95	0.227533	0.071837
ATP-Phe-PPi	376	382	CIGGEGL	6	647.294	8.08032	0.006352	1000	0.270205	0.029741
apo	376	382	CIGGEGL	6	647.294	8.41533	0.004112	0	0	0
apo	376	382	CIGGEGL	6	647.294	8.45266	0.004574	10	0.220226	0.023385
apo	376	382	CIGGEGL	6	647.294	8.44851	0.003309	30	0.233022	0.019881
apo	376	382	CIGGEGL	6	647.294	8.45477	0.000626	95	0.277833	0.017596
apo	376	382	CIGGEGL	6	647.294	8.46301	0.002954	1000	0.731771	0.020508
ATP-Phe	376	385	CIGGEGLARG	9	931.454	7.24339	0.002449	0	0	0
ATP-Phe	376	385	CIGGEGLARG	9	931.454	7.29739	0.009635	10	0.29415	0.035572
ATP-Phe	376	385	CIGGEGLARG	9	931.454	7.31251	0.012243	30	0.326503	0.015712
ATP-Phe	376	385	CIGGEGLARG	9	931.454	7.31037	0.009519	95	0.341711	0.03676
ATP-Phe	376	385	CIGGEGLARG	9	931.454	7.32046	0.00534	1000	0.562622	0.019593
ATP-Phe-PPi	376	385	CIGGEGLARG	9	931.454	7.24569	0.003988	0	0	0
ATP-Phe-PPi	376	385	CIGGEGLARG	9	931.454	7.28833	0.004604	10	0.29015	0.027848
ATP-Phe-PPi	376	385	CIGGEGLARG	9	931.454	7.29993	0.014093	30	0.305277	0.011528
ATP-Phe-PPi	376	385	CIGGEGLARG	9	931.454	7.31143	0.013281	95	0.292493	0.022233
ATP-Phe-PPi	376	385	CIGGEGLARG	9	931.454	7.31367	0.012681	1000	0.56665	0.066121
apo	376	385	CIGGEGLARG	9	931.454	7.23571	0.003484	0	0	0
apo	376	385	CIGGEGLARG	9	931.454	7.28484	0.00301	10	0.386872	0.011742
apo	376	385	CIGGEGLARG	9	931.454	7.2795	0.002721	30	0.397356	0.020653
apo	376	385	CIGGEGLARG	9	931.454	7.28571	0.001666	95	0.409078	0.020516
apo	376	385	CIGGEGLARG	9	931.454	7.2907	0.001957	1000	1.16623	0.008758
ATP-Phe	377	385	IGGEGLARG	8	828.445	6.81918	0.003995	0	0	0
ATP-Phe	377	385	IGGEGLARG	8	828.445	6.87698	0.005687	10	0.311088	0.033945
ATP-Phe	377	385	IGGEGLARG	8	828.445	6.887	0.005294	30	0.328074	0.015483
ATP-Phe	377	385	IGGEGLARG	8	828.445	6.88362	0.006397	95	0.311247	0.025009
ATP-Phe	377	385	IGGEGLARG	8	828.445	6.88773	0.005172	1000	0.47701	0.032345
ATP-Phe-PPi	377	385	IGGEGLARG	8	828.445	6.8172	0.004881	0	0	0
ATP-Phe-PPi	377	385	IGGEGLARG	8	828.445	6.86256	0.004874	10	0.306879	0.01386
ATP-Phe-PPi	377	385	IGGEGLARG	8	828.445	6.87904	0.007177	30	0.263235	0.013044
ATP-Phe-PPi	377	385	IGGEGLARG	8	828.445	6.89246	0.01233	95	0.286264	0.043769
ATP-Phe-PPi	377	385	IGGEGLARG	8	828.445	6.88981	0.011233	1000	0.5705	0.071485
apo	377	385	IGGEGLARG	8	828.445	6.81218	0.003885	0	0	0
apo	377	385	IGGEGLARG	8	828.445	6.86461	0.004739	10	0.342943	0.023803
apo	377	385	IGGEGLARG	8	828.445	6.85624	0.00553	30	0.389486	0.02323
apo	377	385	IGGEGLARG	8	828.445	6.86529	0.002444	95	0.442858	0.029242
apo	377	385	IGGEGLARG	8	828.445	6.86975	0.001912	1000	0.951975	0.063289
ATP-Phe	378	383	GGEGLA	5	502.238	7.29337	0.005037	0	0	0
ATP-Phe	378	383	GGEGLA	5	502.238	7.35585	0.005877	10	0.088787	0.008641
ATP-Phe	378	383	GGEGLA	5	502.238	7.36485	0.005253	30	0.123377	0.011365
ATP-Phe	378	383	GGEGLA	5	502.238	7.36386	0.005589	95	0.289241	0.023544
ATP-Phe	378	383	GGEGLA	5	502.238	7.36722	0.004862	1000	0.598757	0.021906
ATP-Phe-PPi	378	383	GGEGLA	5	502.238	7.29574	0.00523	0	0	0
ATP-Phe-PPi	378	383	GGEGLA	5	502.238	7.33276	0.006824	10	0.094016	0.009215
ATP-Phe-PPi	378	383	GGEGLA	5	502.238	7.35835	0.010284	30	0.170665	0.013363
ATP-Phe-PPi	378	383	GGEGLA	5	502.238	7.36885	0.012262	95	0.326379	0.017692
ATP-Phe-PPi	378	383	GGEGLA	5	502.238	7.37094	0.011669	1000	0.607404	0.022277
apo	378	383	GGEGLA	5	502.238	7.2803	0.003929	0	0	0
apo	378	383	GGEGLA	5	502.238	7.33161	0.004865	10	0.100134	0.025916
apo	378	383	GGEGLA	5	502.238	7.32169	0.005425	30	0.160283	0.022152
apo	378	383	GGEGLA	5	502.238	7.33441	0.005191	95	0.339501	0.014457
apo	378	383	GGEGLA	5	502.238	7.34992	0.000735	1000	0.633984	0.011007
ATP-Phe	383	392	ARGYWKRPEL	8	1274.69	7.83398	0.005055	0	0	0
ATP-Phe	383	392	ARGYWKRPEL	8	1274.69	7.90696	0.005731	10	1.90628	0.095018
ATP-Phe	383	392	ARGYWKRPEL	8	1274.69	7.91154	0.007093	30	2.11959	0.014797
ATP-Phe	383	392	ARGYWKRPEL	8	1274.69	7.9179	0.00665	95	2.18043	0.018958
ATP-Phe	383	392	ARGYWKRPEL	8	1274.69	7.92307	0.002052	1000	2.36041	0.04129
ATP-Phe-PPi	383	392	ARGYWKRPEL	8	1274.69	7.84502	0.007151	0	0	0
ATP-Phe-PPi	383	392	ARGYWKRPEL	8	1274.69	7.90135	0.003906	10	2.05152	0.104589
ATP-Phe-PPi	383	392	ARGYWKRPEL	8	1274.69	7.91222	0.008195	30	2.16638	0.026184
ATP-Phe-PPi	383	392	ARGYWKRPEL	8	1274.69	7.91716	0.008761	95	2.14248	0.018854
ATP-Phe-PPi	383	392	ARGYWKRPEL	8	1274.69	7.91356	0.006245	1000	2.424	0.056344
apo	383	392	ARGYWKRPEL	8	1274.69	7.81433	0.002265	0	0	0
apo	383	392	ARGYWKRPEL	8	1274.69	7.88369	0.007421	10	2.09298	0.033435
apo	383	392	ARGYWKRPEL	8	1274.69	7.87829	0.00356	30	2.21488	0.044604
apo	383	392	ARGYWKRPEL	8	1274.69	7.88953	0.000396	95	2.28979	0.035366
apo	383	392	ARGYWKRPEL	8	1274.69	7.90418	0.002529	1000	2.78898	0.079902
ATP-Phe	386	392	YWKRPEL	5	990.528	8.13403	0.003799	0	0	0
ATP-Phe	386	392	YWKRPEL	5	990.528	8.2098	0.007258	10	1.77821	0.074056
ATP-Phe	386	392	YWKRPEL	5	990.528	8.21602	0.007499	30	1.90825	0.072284
ATP-Phe	386	392	YWKRPEL	5	990.528	8.22096	0.005417	95	1.99529	0.081173
ATP-Phe	386	392	YWKRPEL	5	990.528	8.23154	0.002156	1000	2.23389	0.072781
ATP-Phe-PPi	386	392	YWKRPEL	5	990.528	8.14377	0.003471	0	0	0
ATP-Phe-PPi	386	392	YWKRPEL	5	990.528	8.20263	0.003955	10	1.8933	0.062515
ATP-Phe-PPi	386	392	YWKRPEL	5	990.528	8.21146	0.008359	30	1.97742	0.041196
ATP-Phe-PPi	386	392	YWKRPEL	5	990.528	8.22014	0.005895	95	1.95154	0.101561
ATP-Phe-PPi	386	392	YWKRPEL	5	990.528	8.21973	0.007641	1000	2.21769	0.07373
apo	386	392	YWKRPEL	5	990.528	8.13301	0.002657	0	0	0
apo	386	392	YWKRPEL	5	990.528	8.19731	0.005697	10	1.90437	0.050577
apo	386	392	YWKRPEL	5	990.528	8.19374	0.002706	30	2.00008	0.052878
apo	386	392	YWKRPEL	5	990.528	8.19992	0.002089	95	2.09294	0.065311
apo	386	392	YWKRPEL	5	990.528	8.21066	0.005225	1000	2.37424	0.018175
ATP-Phe	387	392	WKRPEL	4	827.465	7.88774	0.003493	0	0	0
ATP-Phe	387	392	WKRPEL	4	827.465	7.95346	0.006581	10	1.3026	0.022394
ATP-Phe	387	392	WKRPEL	4	827.465	7.96287	0.01272	30	1.30398	0.038345
ATP-Phe	387	392	WKRPEL	4	827.465	7.96758	0.008691	95	1.28784	0.041129
ATP-Phe	387	392	WKRPEL	4	827.465	7.98429	0.003768	1000	1.45869	0.037811
ATP-Phe-PPi	387	392	WKRPEL	4	827.465	7.8949	0.00464	0	0	0
ATP-Phe-PPi	387	392	WKRPEL	4	827.465	7.94661	0.003444	10	1.23854	0.027781
ATP-Phe-PPi	387	392	WKRPEL	4	827.465	7.9573	0.00999	30	1.27815	0.054006
ATP-Phe-PPi	387	392	WKRPEL	4	827.465	7.96815	0.010625	95	1.23567	0.029339
ATP-Phe-PPi	387	392	WKRPEL	4	827.465	7.96936	0.012318	1000	1.49587	0.048252
apo	387	392	WKRPEL	4	827.465	7.88455	0.002567	0	0	0
apo	387	392	WKRPEL	4	827.465	7.94145	0.00819	10	1.35856	0.02802
apo	387	392	WKRPEL	4	827.465	7.94039	0.002546	30	1.3252	0.034815
apo	387	392	WKRPEL	4	827.465	7.94406	0.001416	95	1.32729	0.043943
apo	387	392	WKRPEL	4	827.465	7.95554	0.002307	1000	1.61071	0.039045
ATP-Phe	387	408	WKRPELTSQKFVDNPFVPGEKL	18	2614.39	8.9013	0.002836	0	0	0
ATP-Phe	387	408	WKRPELTSQKFVDNPFVPGEKL	18	2614.39	8.96615	0.009187	10	2.04881	0.023337
ATP-Phe	387	408	WKRPELTSQKFVDNPFVPGEKL	18	2614.39	8.96491	0.001867	30	2.17498	0.025142
ATP-Phe	387	408	WKRPELTSQKFVDNPFVPGEKL	18	2614.39	8.97642	0.001543	95	2.54558	0.055008
ATP-Phe	387	408	WKRPELTSQKFVDNPFVPGEKL	18	2614.39	8.9839	0.004132	1000	3.50173	0.065777
ATP-Phe-PPi	387	408	WKRPELTSQKFVDNPFVPGEKL	18	2614.39	8.91574	0.004385	0	0	0
ATP-Phe-PPi	387	408	WKRPELTSQKFVDNPFVPGEKL	18	2614.39	8.96692	0.002317	10	2.05436	0.023686
ATP-Phe-PPi	387	408	WKRPELTSQKFVDNPFVPGEKL	18	2614.39	8.9695	0.006852	30	2.19638	0.017206
ATP-Phe-PPi	387	408	WKRPELTSQKFVDNPFVPGEKL	18	2614.39	8.97059	0.000761	95	2.58618	0.031145
ATP-Phe-PPi	387	408	WKRPELTSQKFVDNPFVPGEKL	18	2614.39	8.96682	0.005869	1000	3.68036	0.184683
apo	387	408	WKRPELTSQKFVDNPFVPGEKL	18	2614.39	8.92	0.001641	0	0	0
apo	387	408	WKRPELTSQKFVDNPFVPGEKL	18	2614.39	8.96435	0.005866	10	2.14481	0.040807
apo	387	408	WKRPELTSQKFVDNPFVPGEKL	18	2614.39	8.96054	0.002307	30	2.29003	0.035491
apo	387	408	WKRPELTSQKFVDNPFVPGEKL	18	2614.39	8.96409	0.003261	95	2.7559	0.009744
apo	387	408	WKRPELTSQKFVDNPFVPGEKL	18	2614.39	8.97353	0.004691	1000	4.15328	0.016136
ATP-Phe	397	408	FVDNPFVPGEKL	9	1360.7	9.70816	0.003207	0	0	0
ATP-Phe	397	408	FVDNPFVPGEKL	9	1360.7	9.76661	0.012731	10	1.06742	0.079802
ATP-Phe	397	408	FVDNPFVPGEKL	9	1360.7	9.76093	0.001325	30	1.17537	0.034985
ATP-Phe	397	408	FVDNPFVPGEKL	9	1360.7	9.76801	0.003059	95	1.44307	0.066148
ATP-Phe	397	408	FVDNPFVPGEKL	9	1360.7	9.77025	0.00936	1000	1.88964	0.024627
ATP-Phe-PPi	397	408	FVDNPFVPGEKL	9	1360.7	9.72783	0.003448	0	0	0
ATP-Phe-PPi	397	408	FVDNPFVPGEKL	9	1360.7	9.76815	0.006144	10	1.12626	0.01076
ATP-Phe-PPi	397	408	FVDNPFVPGEKL	9	1360.7	9.76014	0.005272	30	1.24231	0.014731
ATP-Phe-PPi	397	408	FVDNPFVPGEKL	9	1360.7	9.75244	0.005169	95	1.50802	0.02221
ATP-Phe-PPi	397	408	FVDNPFVPGEKL	9	1360.7	9.74573	0.006968	1000	1.83879	0.076831
apo	397	408	FVDNPFVPGEKL	9	1360.7	9.7384	0.005346	0	0	0
apo	397	408	FVDNPFVPGEKL	9	1360.7	9.77035	0.004655	10	1.12034	0.020306
apo	397	408	FVDNPFVPGEKL	9	1360.7	9.77138	0.003184	30	1.25388	0.042509
apo	397	408	FVDNPFVPGEKL	9	1360.7	9.76955	0.002277	95	1.54523	0.063498
apo	397	408	FVDNPFVPGEKL	9	1360.7	9.77739	0.004208	1000	1.94078	0.024958
ATP-Phe	398	408	VDNPFVPGEKL	8	1213.63	9.26281	0.003891	0	0	0
ATP-Phe	398	408	VDNPFVPGEKL	8	1213.63	9.32716	0.014367	10	0.727278	0.013562
ATP-Phe	398	408	VDNPFVPGEKL	8	1213.63	9.32031	0.001399	30	0.821146	0.020719
ATP-Phe	398	408	VDNPFVPGEKL	8	1213.63	9.33018	0.00489	95	0.983918	0.025578
ATP-Phe	398	408	VDNPFVPGEKL	8	1213.63	9.34202	0.008521	1000	1.23832	0.039139
ATP-Phe-PPi	398	408	VDNPFVPGEKL	8	1213.63	9.27653	0.006524	0	0	0
ATP-Phe-PPi	398	408	VDNPFVPGEKL	8	1213.63	9.31921	0.0041	10	0.754068	0.019064
ATP-Phe-PPi	398	408	VDNPFVPGEKL	8	1213.63	9.31867	0.005647	30	0.83633	0.021368
ATP-Phe-PPi	398	408	VDNPFVPGEKL	8	1213.63	9.32058	0.001106	95	1.03633	0.046402
ATP-Phe-PPi	398	408	VDNPFVPGEKL	8	1213.63	9.31364	0.004473	1000	1.20108	0.043248
apo	398	408	VDNPFVPGEKL	8	1213.63	9.28995	0.003171	0	0	0
apo	398	408	VDNPFVPGEKL	8	1213.63	9.33338	0.010714	10	0.726182	0.027422
apo	398	408	VDNPFVPGEKL	8	1213.63	9.32789	0.004799	30	0.807918	0.033266
apo	398	408	VDNPFVPGEKL	8	1213.63	9.3291	0.004128	95	1.02746	0.024285
apo	398	408	VDNPFVPGEKL	8	1213.63	9.34085	0.0084	1000	1.3797	0.025137
ATP-Phe	409	425	YKTGDQARWLSDGNIEY	16	2014.94	8.88315	0.003211	0	0	0
ATP-Phe	409	425	YKTGDQARWLSDGNIEY	16	2014.94	8.94088	0.001981	10	1.03538	0.040909
ATP-Phe	409	425	YKTGDQARWLSDGNIEY	16	2014.94	8.94323	0.000612	30	1.19951	0.037416
ATP-Phe	409	425	YKTGDQARWLSDGNIEY	16	2014.94	8.95439	0.002095	95	1.4763	0.044021
ATP-Phe	409	425	YKTGDQARWLSDGNIEY	16	2014.94	8.95913	0.003035	1000	1.97606	0.073529
ATP-Phe-PPi	409	425	YKTGDQARWLSDGNIEY	16	2014.94	8.89293	0.003895	0	0	0
ATP-Phe-PPi	409	425	YKTGDQARWLSDGNIEY	16	2014.94	8.93595	0.006848	10	1.16576	0.042248
ATP-Phe-PPi	409	425	YKTGDQARWLSDGNIEY	16	2014.94	8.93871	0.004169	30	1.32036	0.042207
ATP-Phe-PPi	409	425	YKTGDQARWLSDGNIEY	16	2014.94	8.93744	0.001027	95	1.58456	0.034719
ATP-Phe-PPi	409	425	YKTGDQARWLSDGNIEY	16	2014.94	8.93669	0.005576	1000	2.07564	0.052597
apo	409	425	YKTGDQARWLSDGNIEY	16	2014.94	8.89416	0.00669	0	0	0
apo	409	425	YKTGDQARWLSDGNIEY	16	2014.94	8.93298	0.007467	10	1.15946	0.018116
apo	409	425	YKTGDQARWLSDGNIEY	16	2014.94	8.92572	0.001267	30	1.35052	0.038708
apo	409	425	YKTGDQARWLSDGNIEY	16	2014.94	8.93641	0.002775	95	1.65533	0.039778
apo	409	425	YKTGDQARWLSDGNIEY	16	2014.94	8.94295	0.001928	1000	2.42015	0.015454
ATP-Phe	409	426	YKTGDQARWLSDGNIEYL	17	2128.02	9.46052	0.003168	0	0	0
ATP-Phe	409	426	YKTGDQARWLSDGNIEYL	17	2128.02	9.52172	0.010179	10	1.16292	0.015196
ATP-Phe	409	426	YKTGDQARWLSDGNIEYL	17	2128.02	9.51961	0.003569	30	1.33698	0.017813
ATP-Phe	409	426	YKTGDQARWLSDGNIEYL	17	2128.02	9.52704	0.001481	95	1.57942	0.034989
ATP-Phe	409	426	YKTGDQARWLSDGNIEYL	17	2128.02	9.53359	0.006478	1000	2.08801	0.071897
ATP-Phe-PPi	409	426	YKTGDQARWLSDGNIEYL	17	2128.02	9.47532	0.003691	0	0	0
ATP-Phe-PPi	409	426	YKTGDQARWLSDGNIEYL	17	2128.02	9.52262	0.004726	10	1.19052	0.024205
ATP-Phe-PPi	409	426	YKTGDQARWLSDGNIEYL	17	2128.02	9.51686	0.003517	30	1.38072	0.038911
ATP-Phe-PPi	409	426	YKTGDQARWLSDGNIEYL	17	2128.02	9.51304	0.003681	95	1.62394	0.016269
ATP-Phe-PPi	409	426	YKTGDQARWLSDGNIEYL	17	2128.02	9.50783	0.00548	1000	2.10376	0.059479
apo	409	426	YKTGDQARWLSDGNIEYL	17	2128.02	9.48746	0.005943	0	0	0
apo	409	426	YKTGDQARWLSDGNIEYL	17	2128.02	9.52285	0.005221	10	1.30564	0.068709
apo	409	426	YKTGDQARWLSDGNIEYL	17	2128.02	9.52633	0.003567	30	1.44142	0.026718
apo	409	426	YKTGDQARWLSDGNIEYL	17	2128.02	9.5243	0.000881	95	1.72551	0.030416
apo	409	426	YKTGDQARWLSDGNIEYL	17	2128.02	9.52958	0.006358	1000	2.47993	0.042671
ATP-Phe	415	426	ARWLSDGNIEYL	11	1435.71	9.80237	0.005625	0	0	0
ATP-Phe	415	426	ARWLSDGNIEYL	11	1435.71	9.85327	0.012059	10	0.955962	0.046054
ATP-Phe	415	426	ARWLSDGNIEYL	11	1435.71	9.8474	0.003572	30	1.05191	0.031494
ATP-Phe	415	426	ARWLSDGNIEYL	11	1435.71	9.85524	0.002499	95	1.12039	0.014892
[truncated: 3,041 more rows]
